# Supplementary material for: Dissociation rate compensation mechanism for budding yeast pioneer transcription factors
Source: eLife journal article supplement (doi:10.7554/elife.43008), 2019-03-19

**A**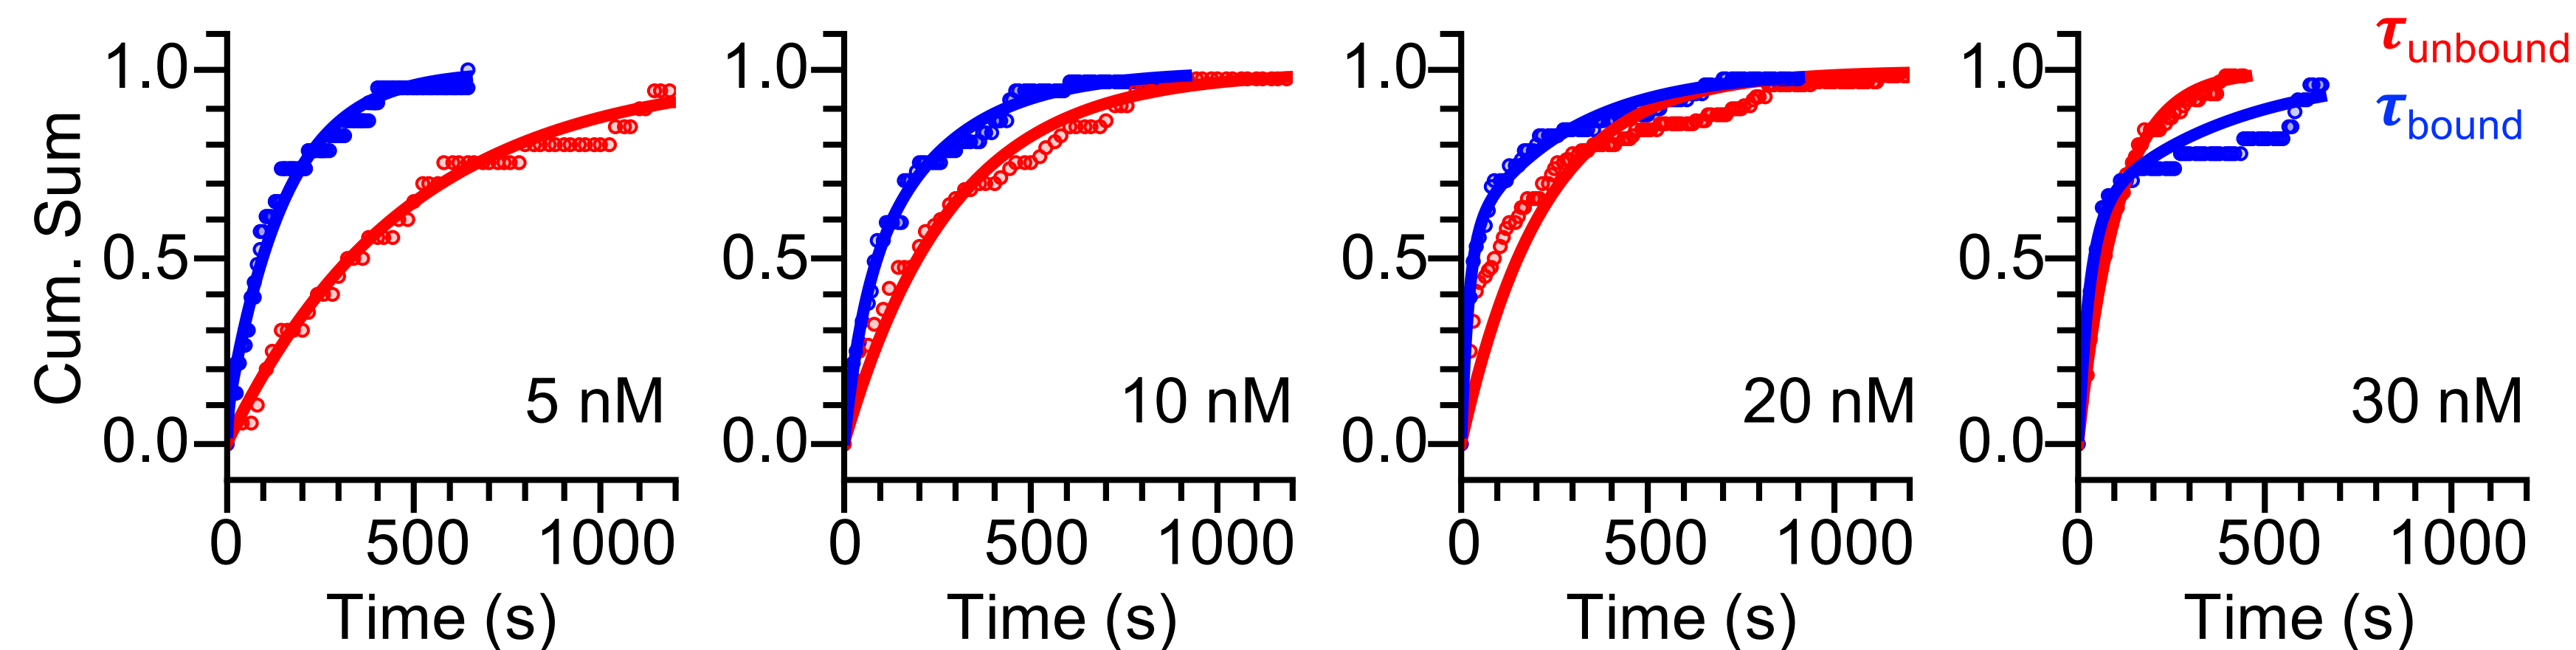**B**

Log likelihood ratio test results

$H_0$ : distribution follows single exponential decay

| Nucleosome       | P-value |       |       |        |
|------------------|---------|-------|-------|--------|
| Measurement      | 5 nM    | 10 nM | 20 nM | 30 nM  |
| $k_{\text{off}}$ | 0.009   | 0.26  | 3E-8  | 1.8E-4 |
| $k_{\text{on}}$  | 1       | 0.028 | 5E-7  | 1      |

**C**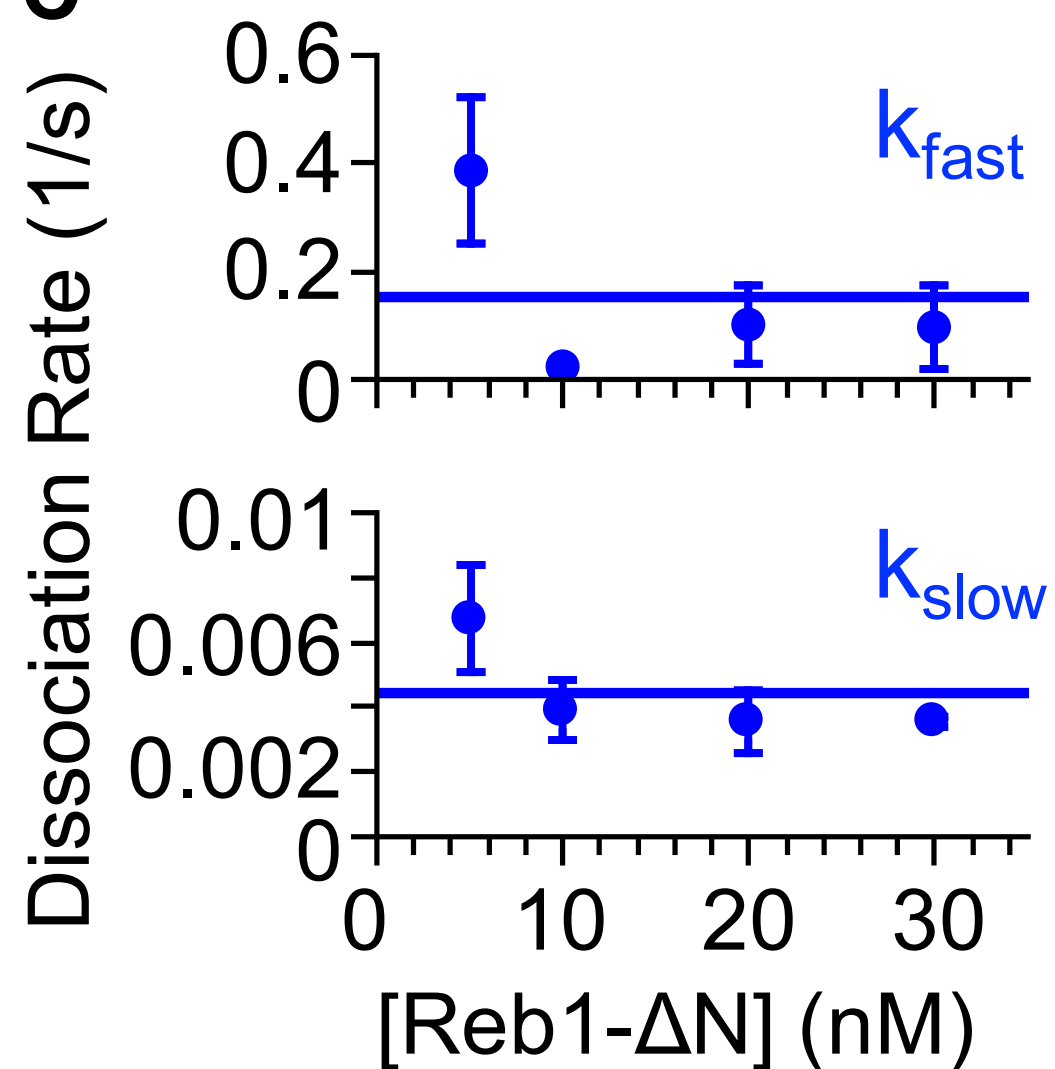**D**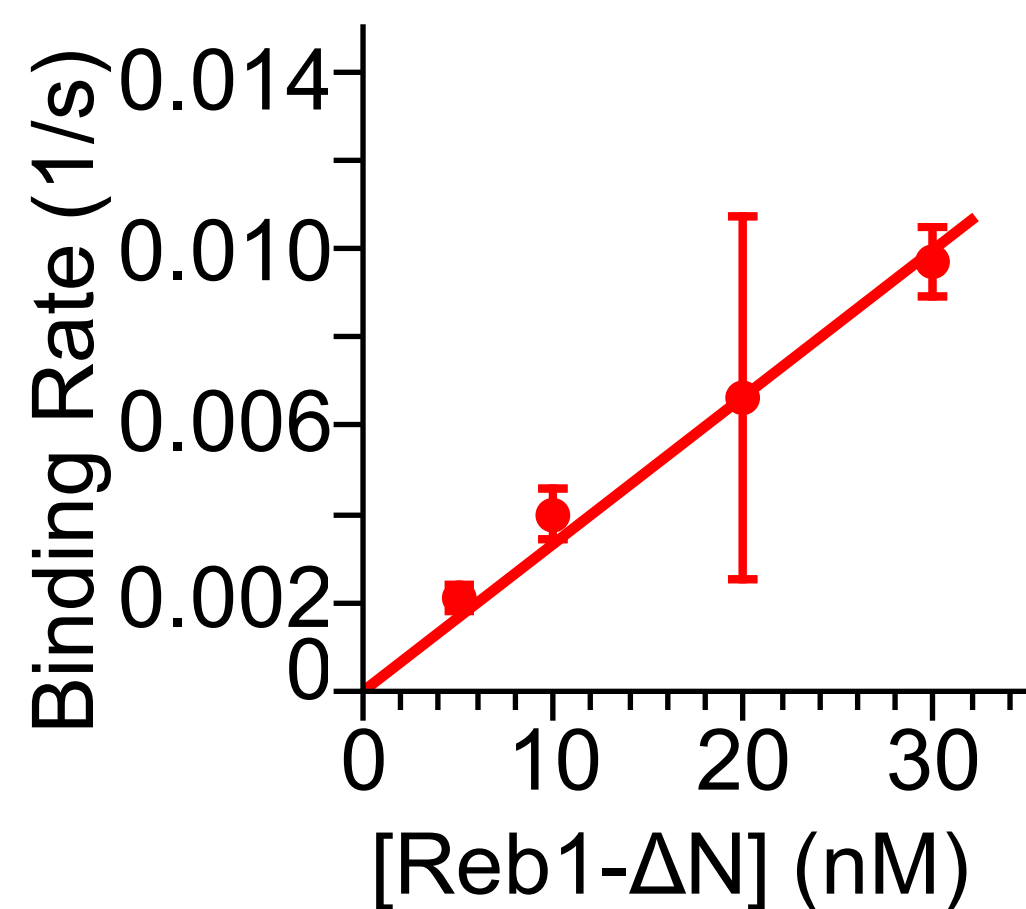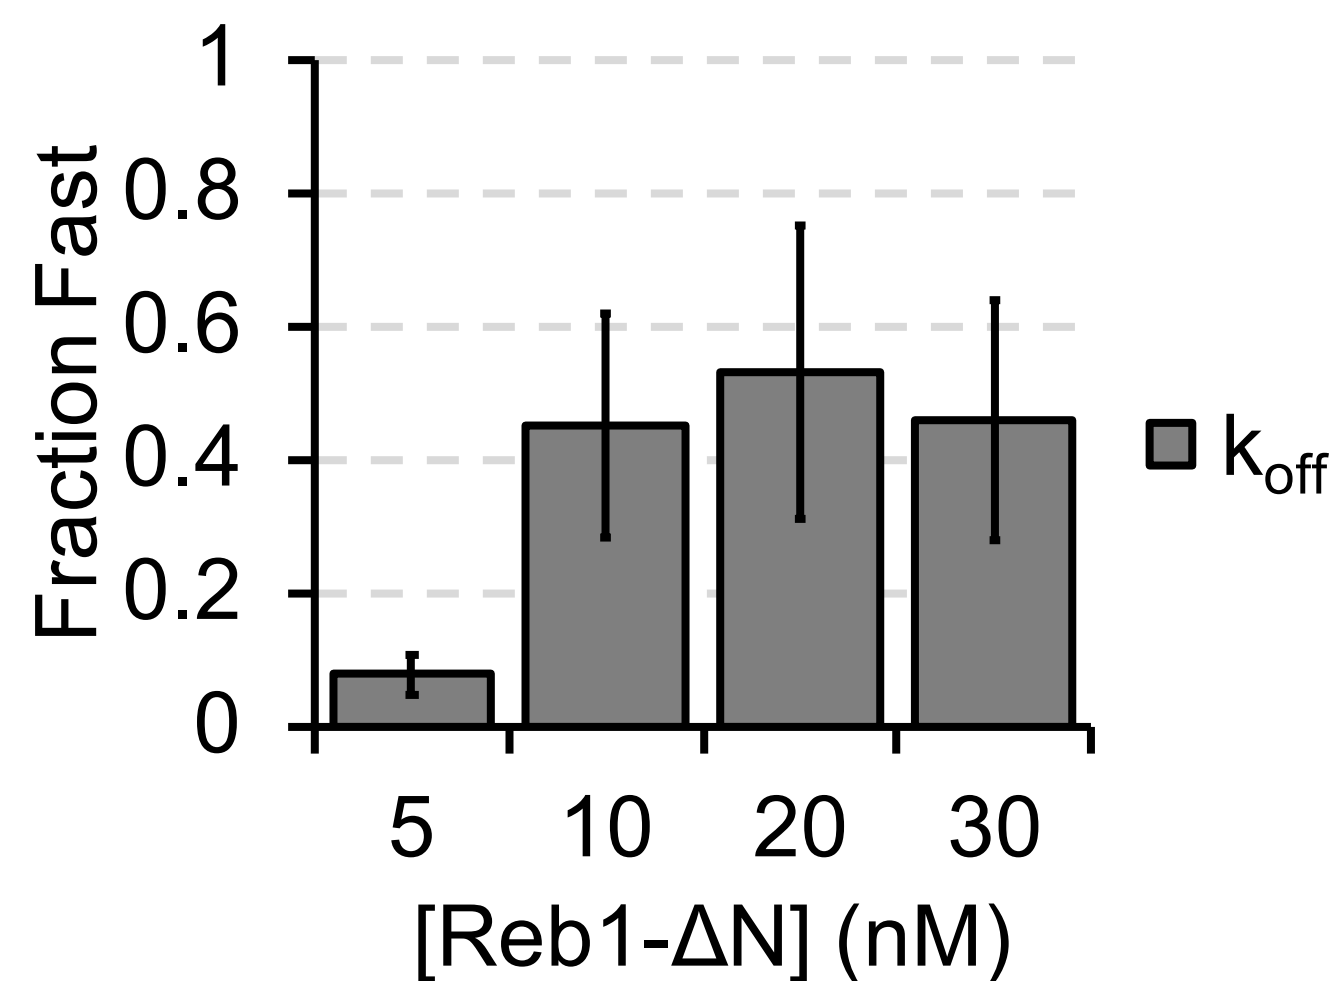

Supplement: supp [file elife-43008-supp-v1.zip]
