# Supplementary material for: Dissociation rate compensation mechanism for budding yeast pioneer transcription factors
Source: eLife journal article supplement (doi:10.7554/elife.43008), 2019-03-19

**A**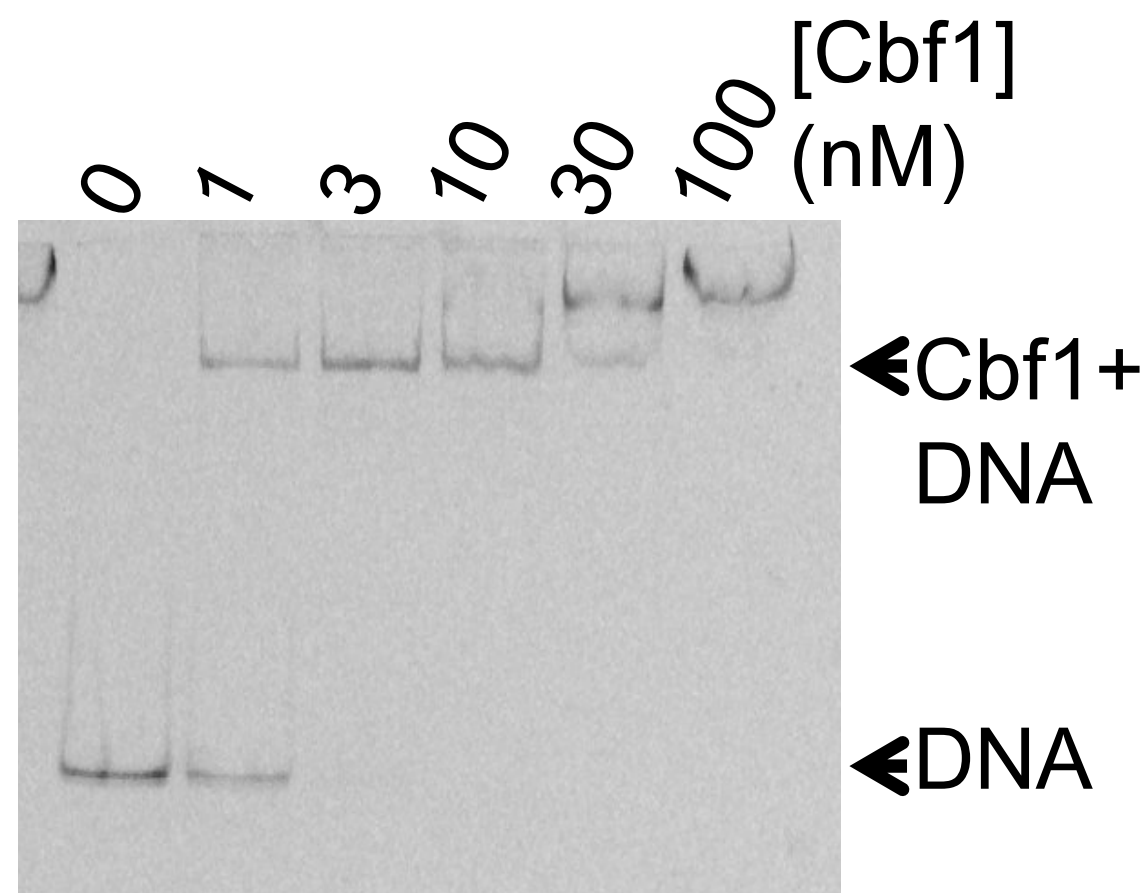**B**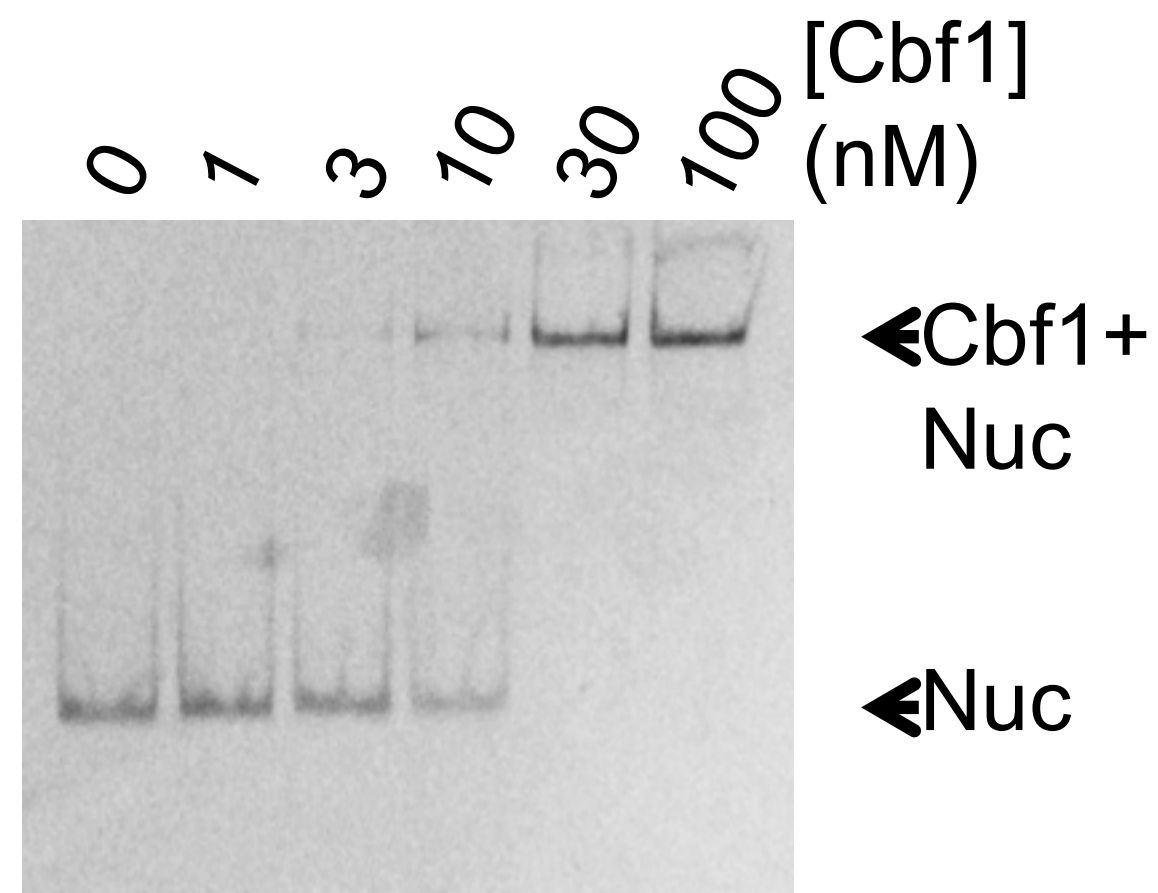**C**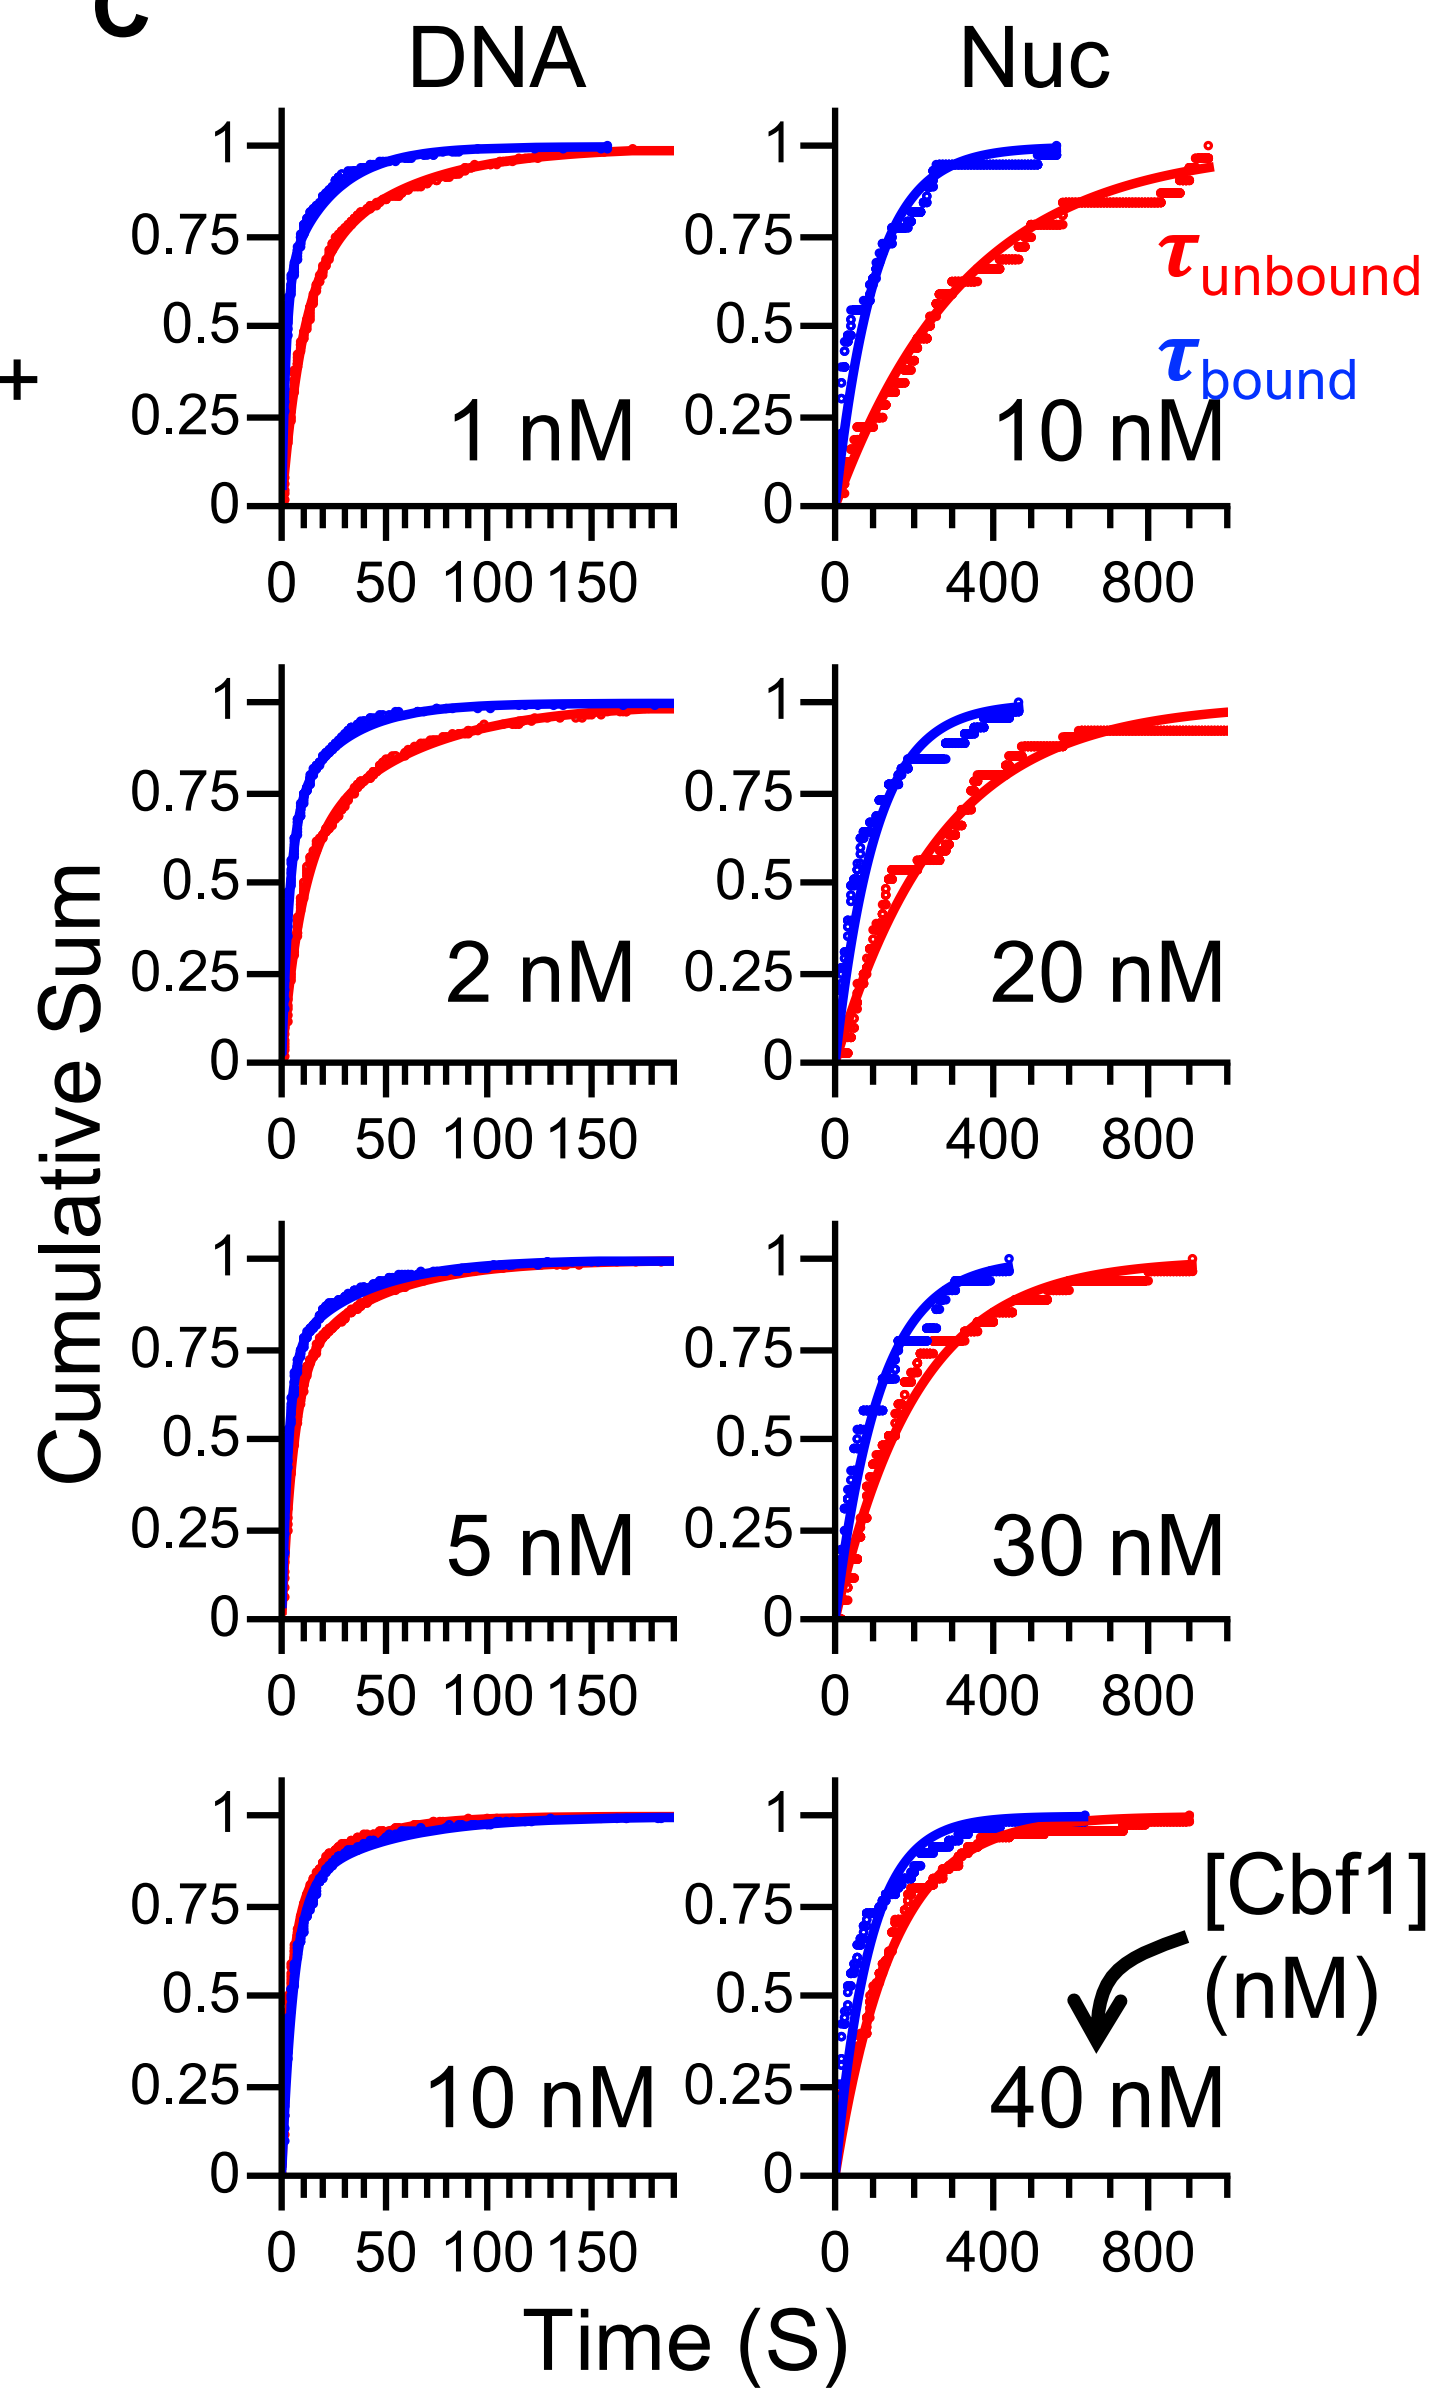**D**

| DNA              | P-value |        |        |        |
|------------------|---------|--------|--------|--------|
| Measurement      | 1 nM    | 2 nM   | 5 nM   | 10 nM  |
| $k_{\text{off}}$ | <1E-16  | <1E-16 | <1E-16 | <1E-16 |
| $k_{\text{on}}$  | <1E-16  | <1E-16 | <1E-16 | <1E-16 |

  

| Nucleosome       | P-value |       |        |       |
|------------------|---------|-------|--------|-------|
| Measurement      | 10 nM   | 20 nM | 30 nM  | 40 nM |
| $k_{\text{off}}$ | 1.2E-2  | 7E-2  | 2.6E-1 | 5E-4  |
| $k_{\text{on}}$  | 1       | 1     | 1      | 5E-4  |

**E**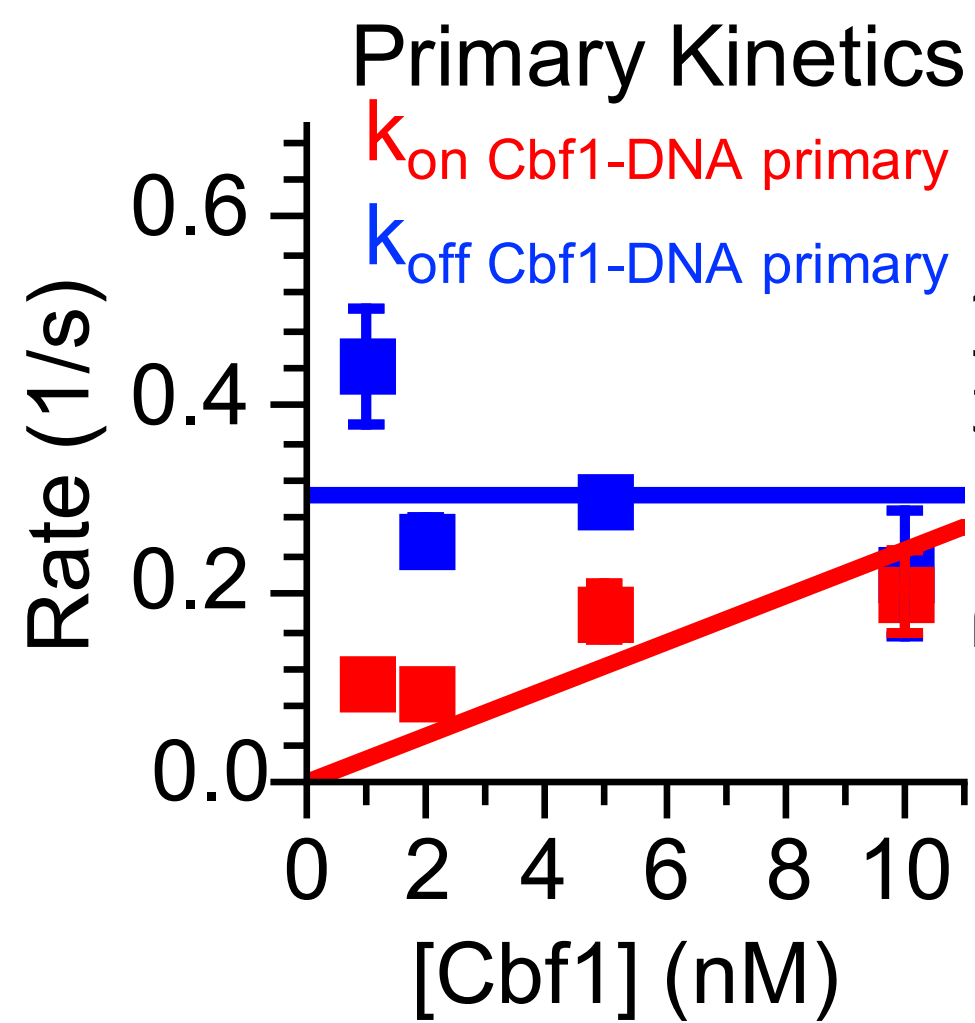**F**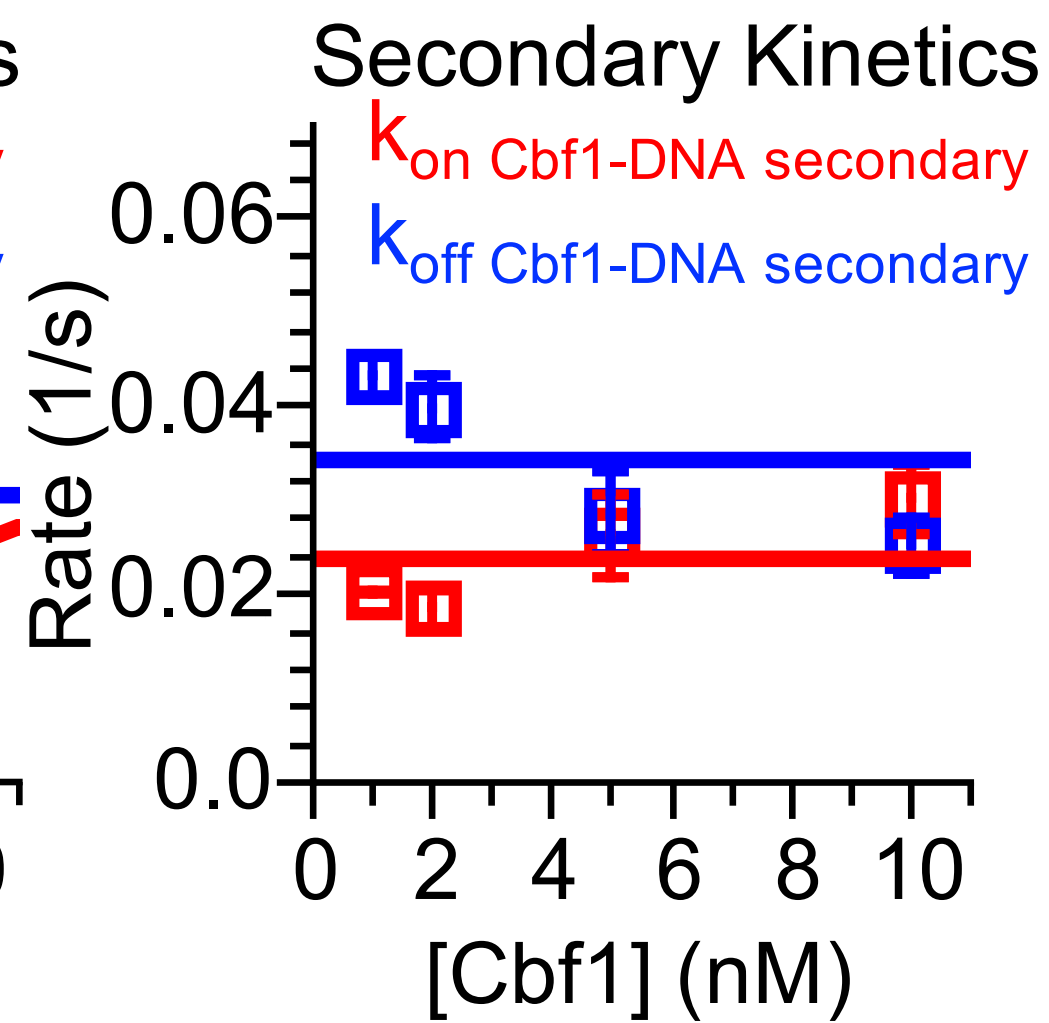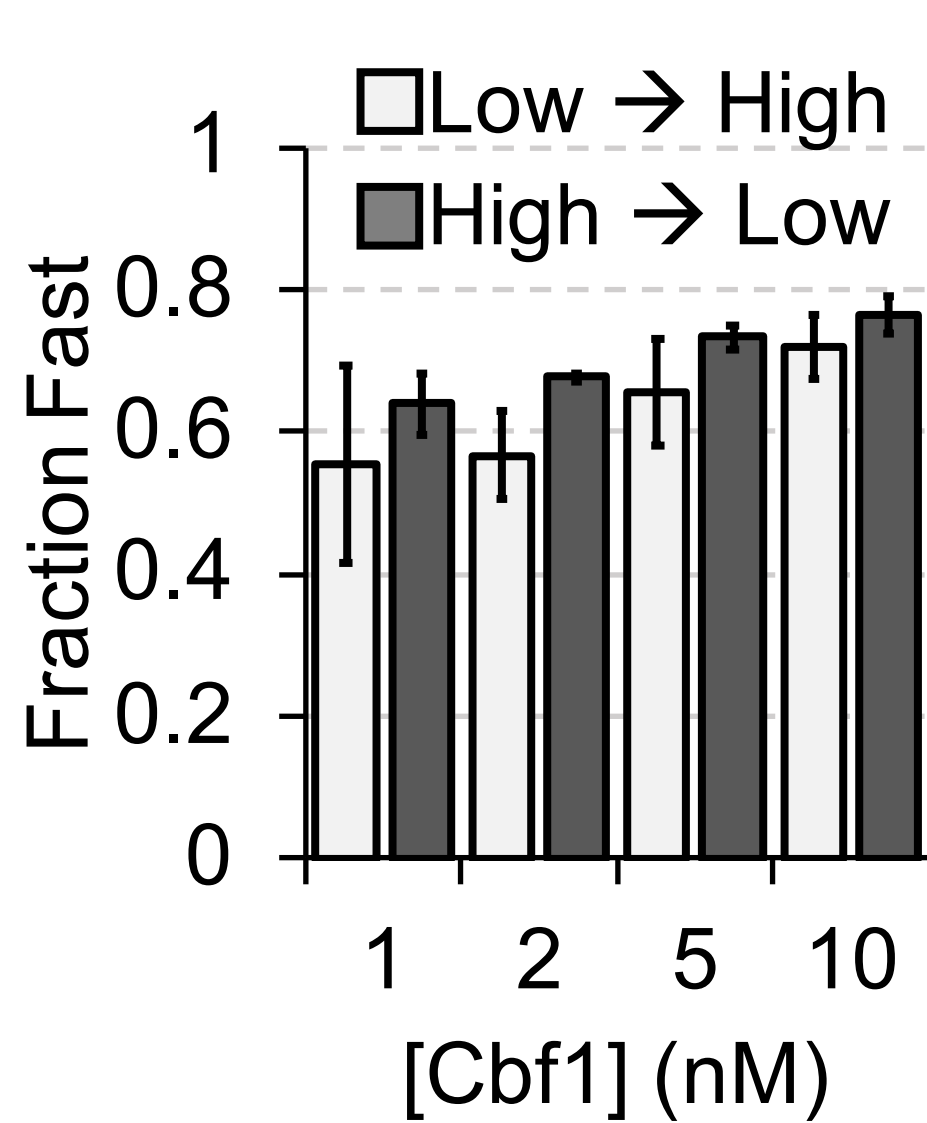**G**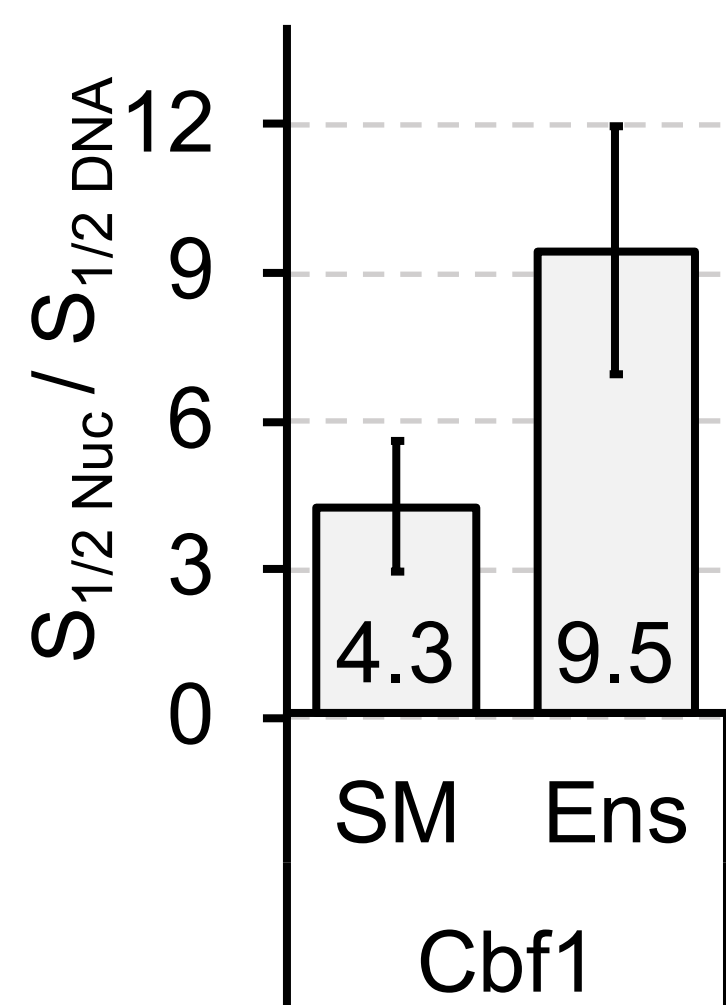

Supplement: supp [file elife-43008-supp-v1.zip]
