# Supplementary material for: Dissociation rate compensation mechanism for budding yeast pioneer transcription factors
Source: eLife journal article supplement (doi:10.7554/elife.43008), 2019-03-19

**A**

2 nM

5 nM

10 nM

15 nM

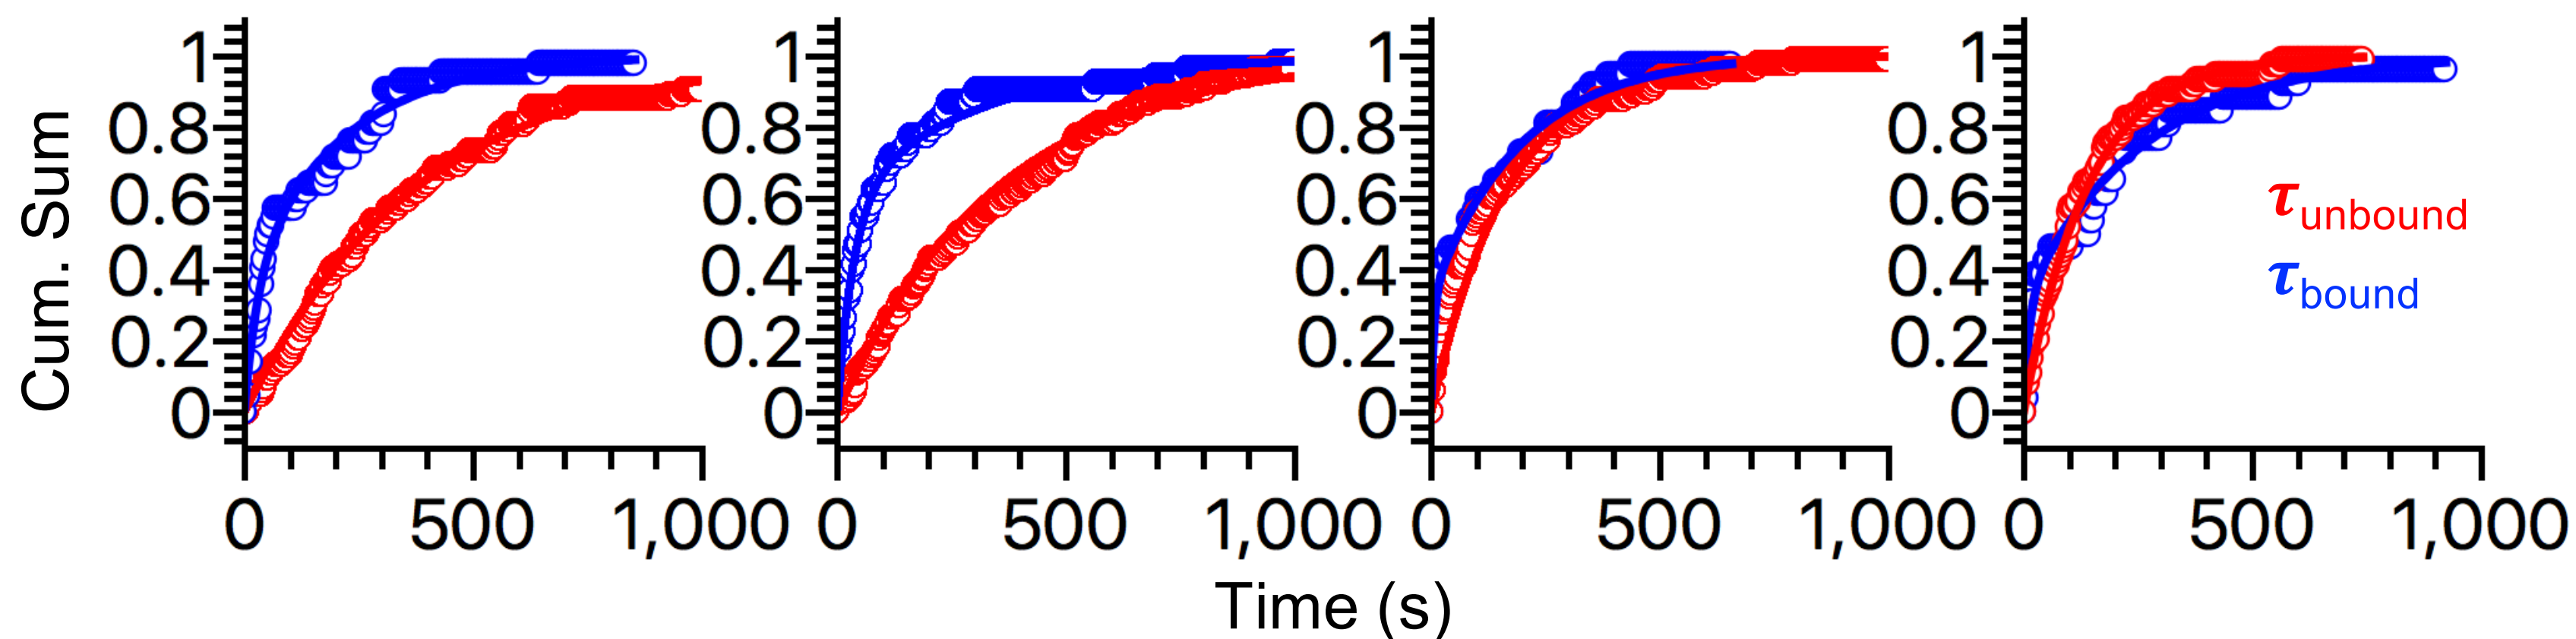**B**

Log likelihood ratio test results

 $H_0$ : distribution follows single exponential decay

| Nucleosome       | P-value |      |       |       |
|------------------|---------|------|-------|-------|
| Measurement      | 2 nM    | 5 nM | 10 nM | 15 nM |
| $k_{\text{off}}$ | 0.03    | 1E-5 | 3E-5  | 0.007 |
| $k_{\text{on}}$  | 1       | 1    | 0.004 | 0.5   |

**C****D****E**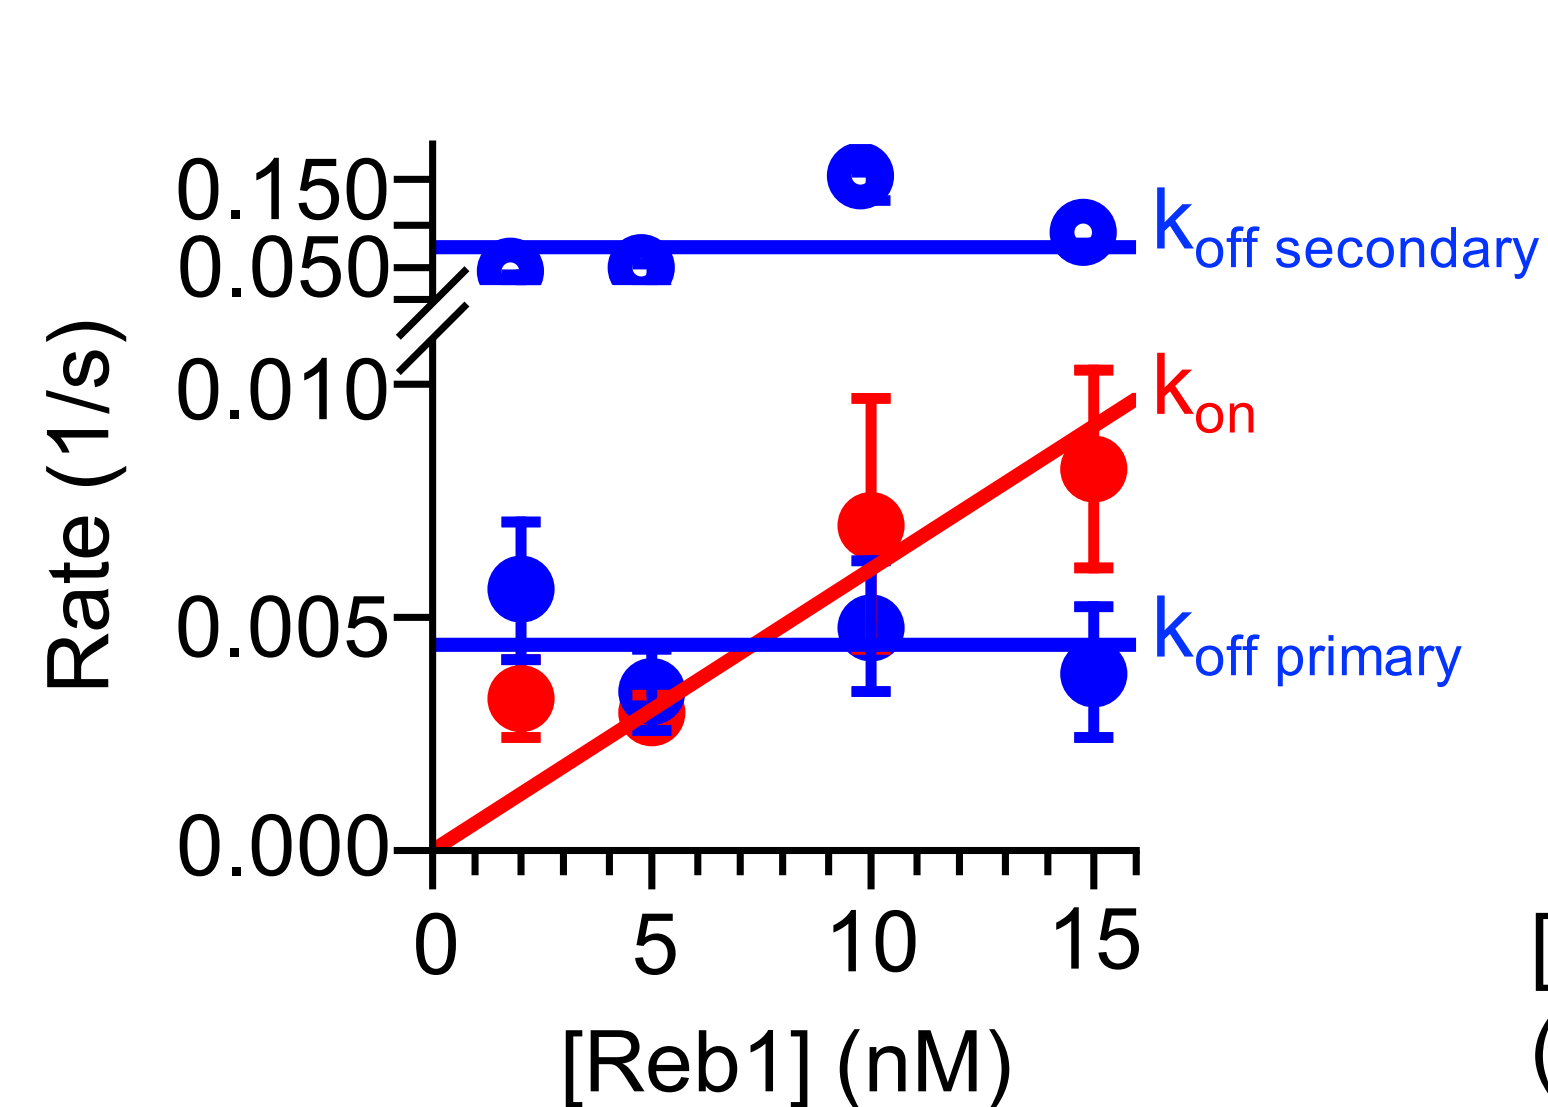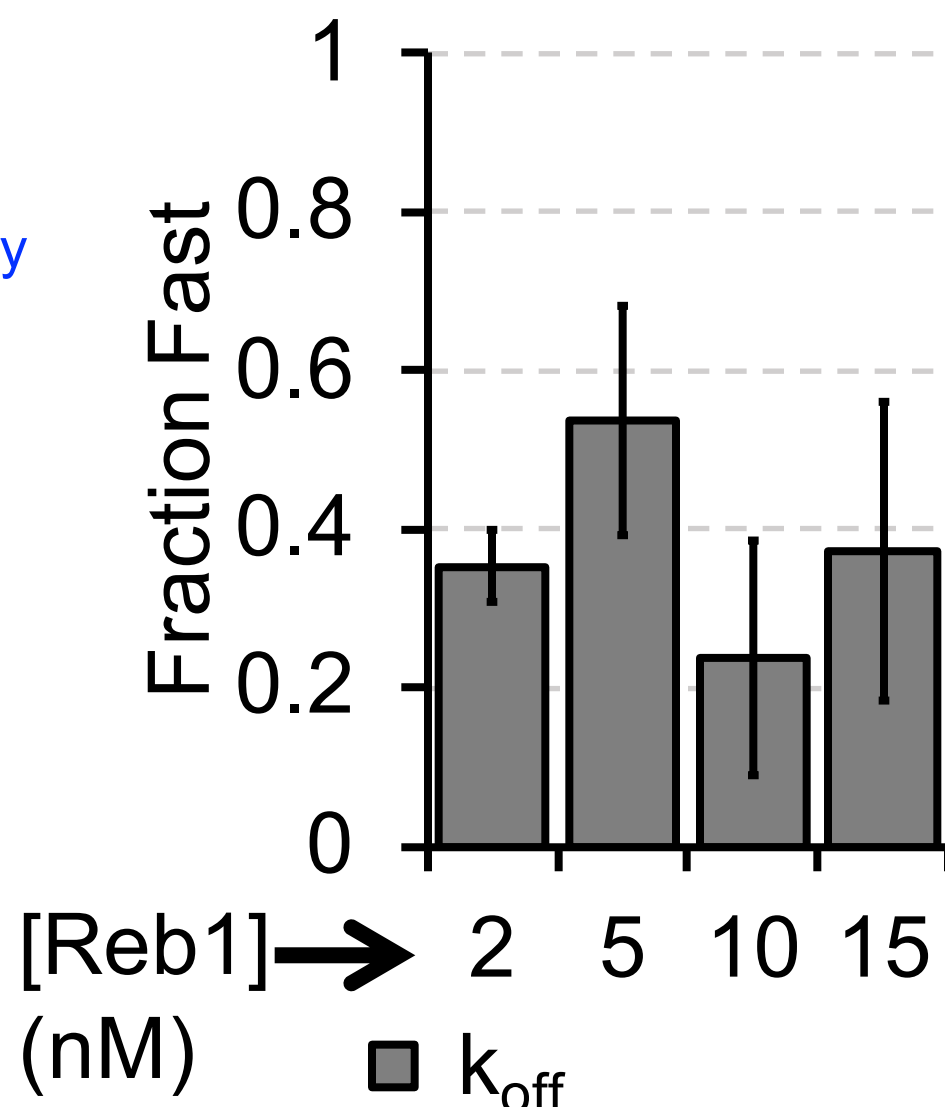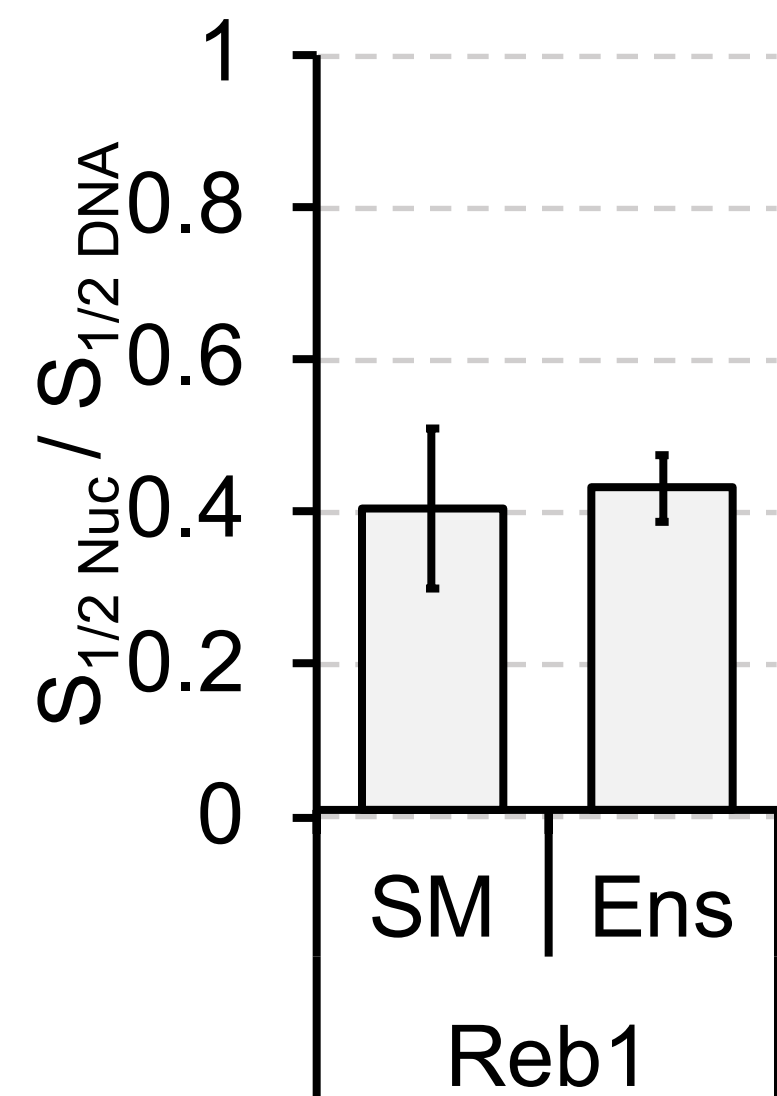

Supplement: supp [file elife-43008-supp-v1.zip]
