# Supplementary figures and images for: Dissociation rate compensation mechanism for budding yeast pioneer transcription factors
Source: eLife journal article supplement (doi:10.7554/elife.43008), 2019-03-19

0      3      10      30      100      300

← [Reb1] (nM)

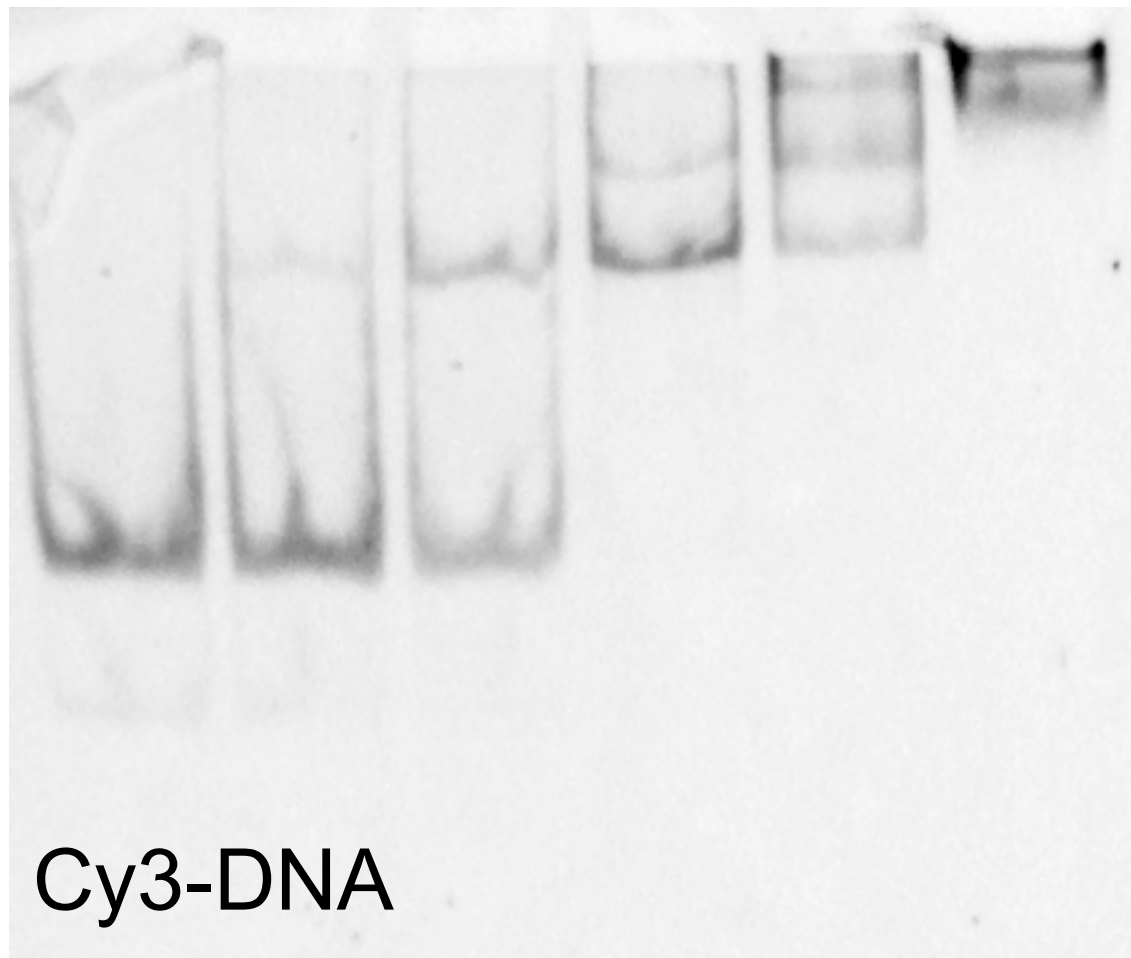

← Nuc. +  
Reb1

← Nuc.  
([Nuc] = 5 nM)

Cy3-DNA

Supplement: supp [file elife-43008-supp-v1.zip]

**A**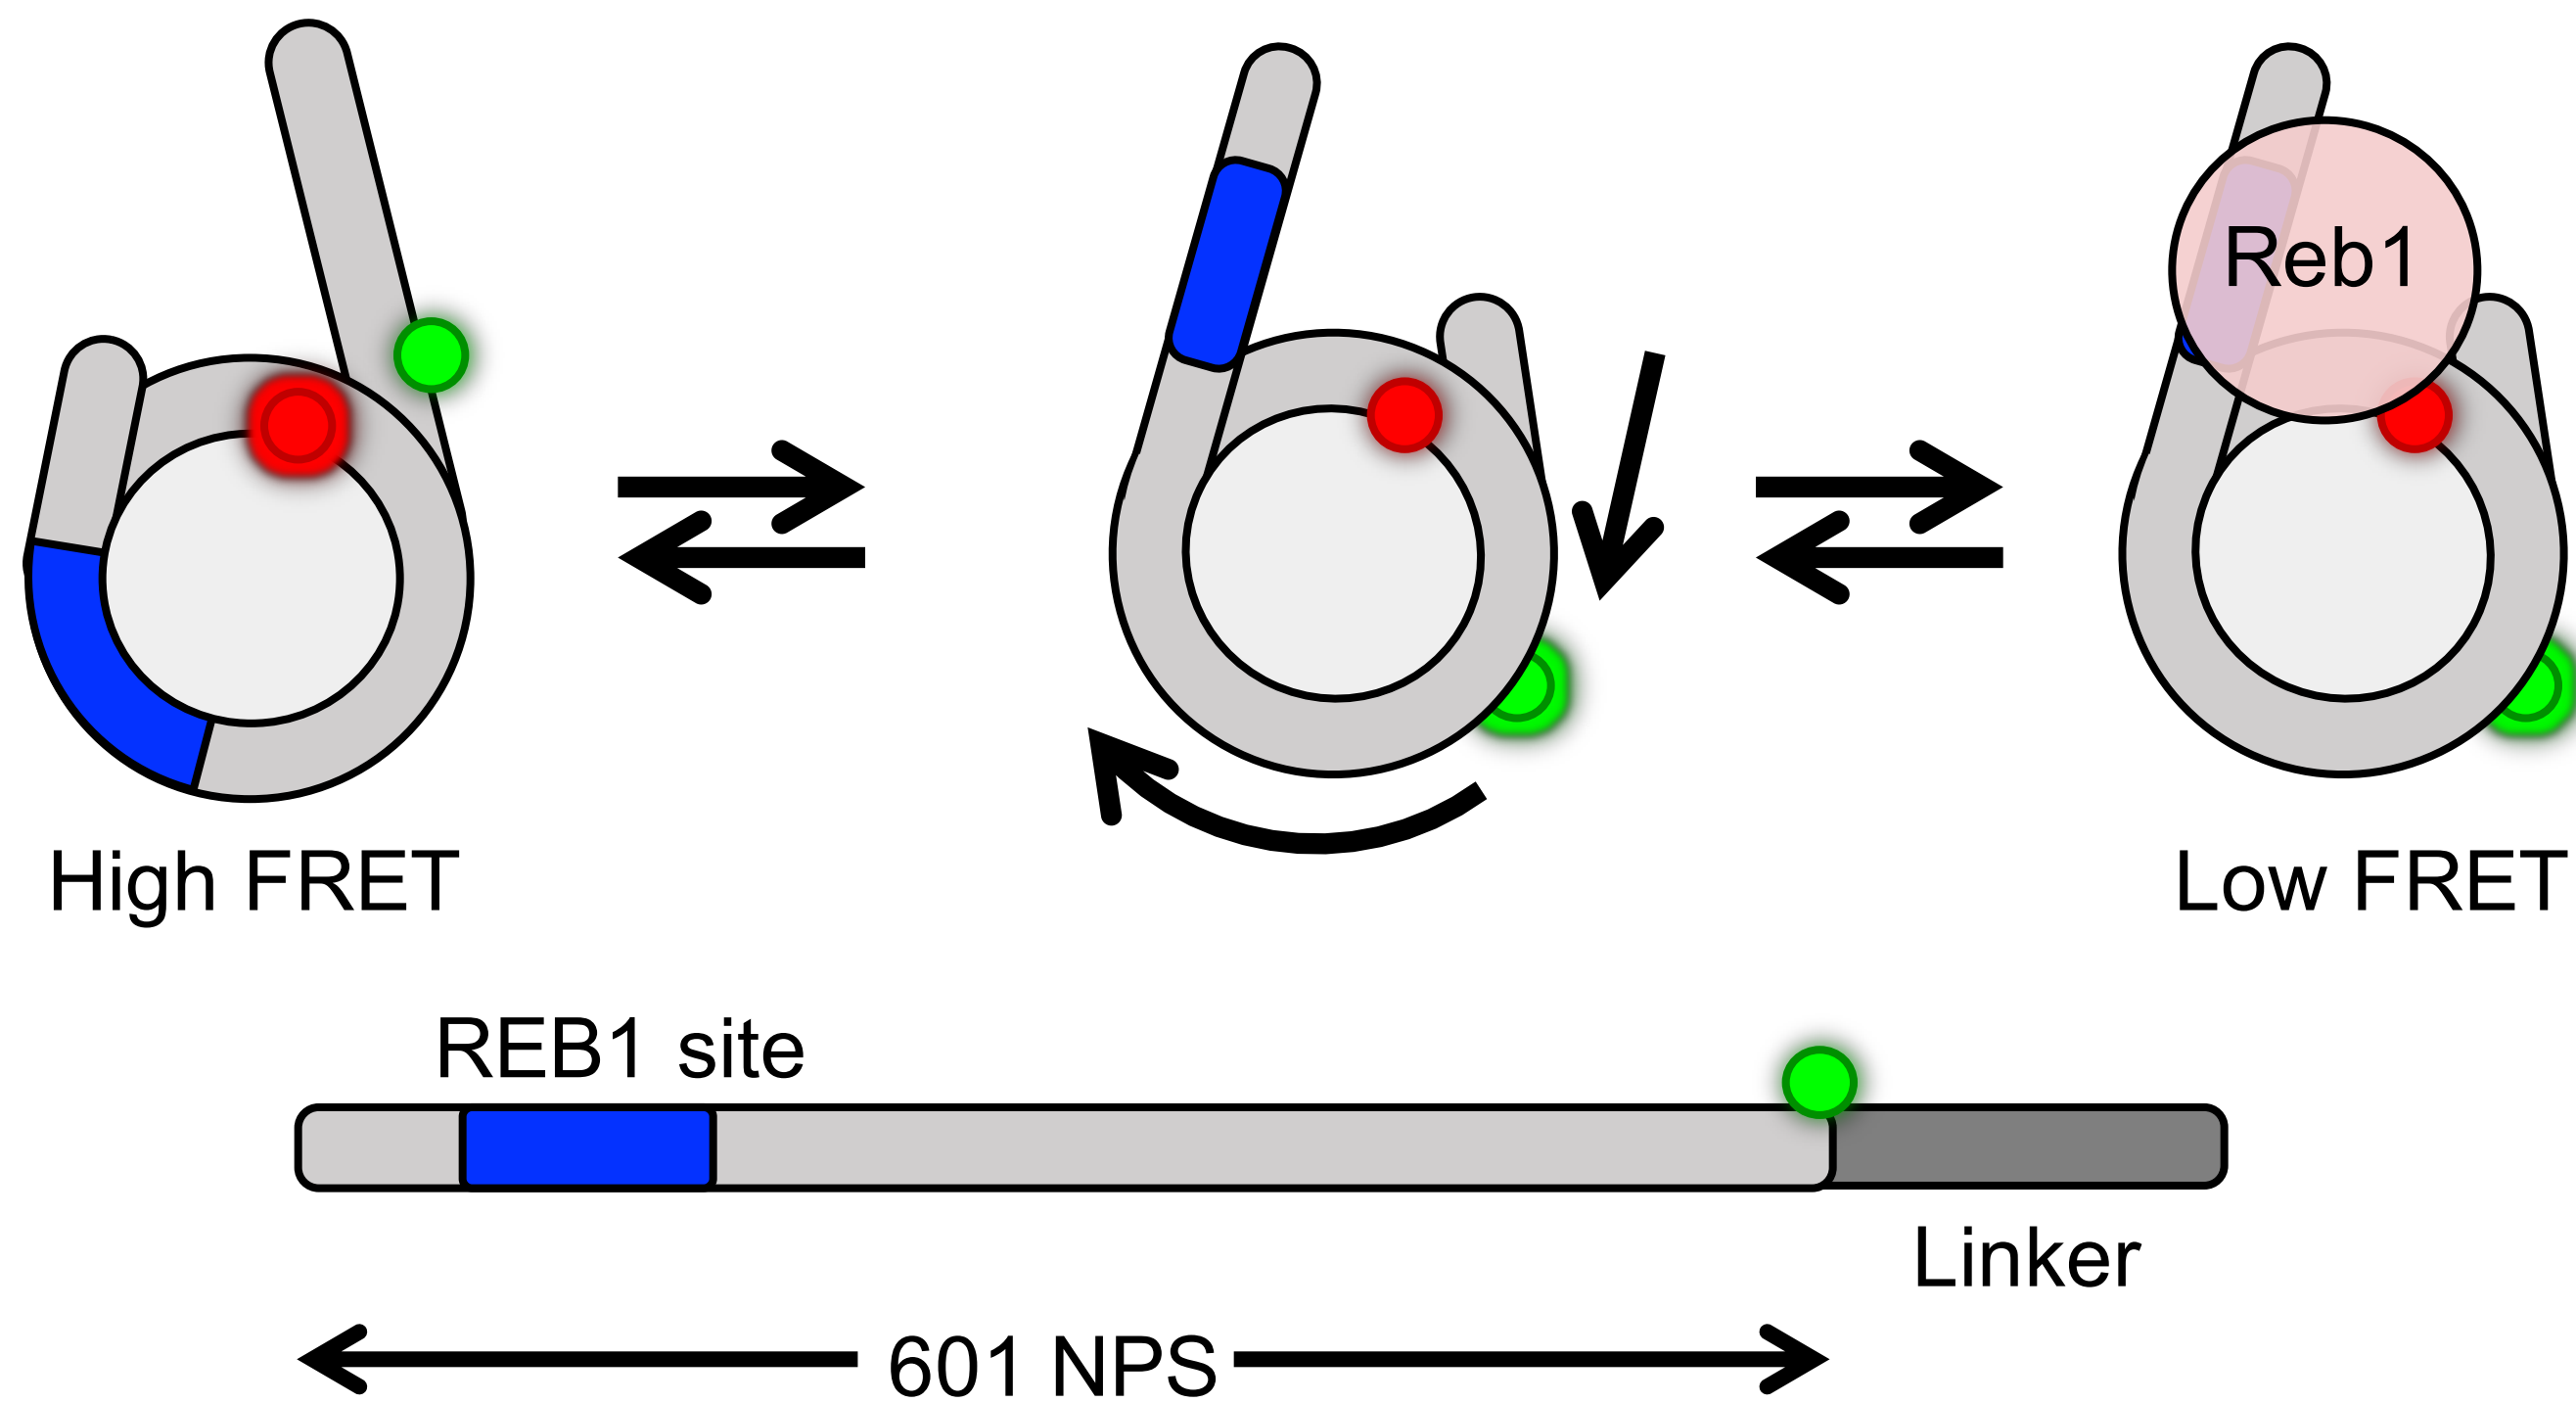**B**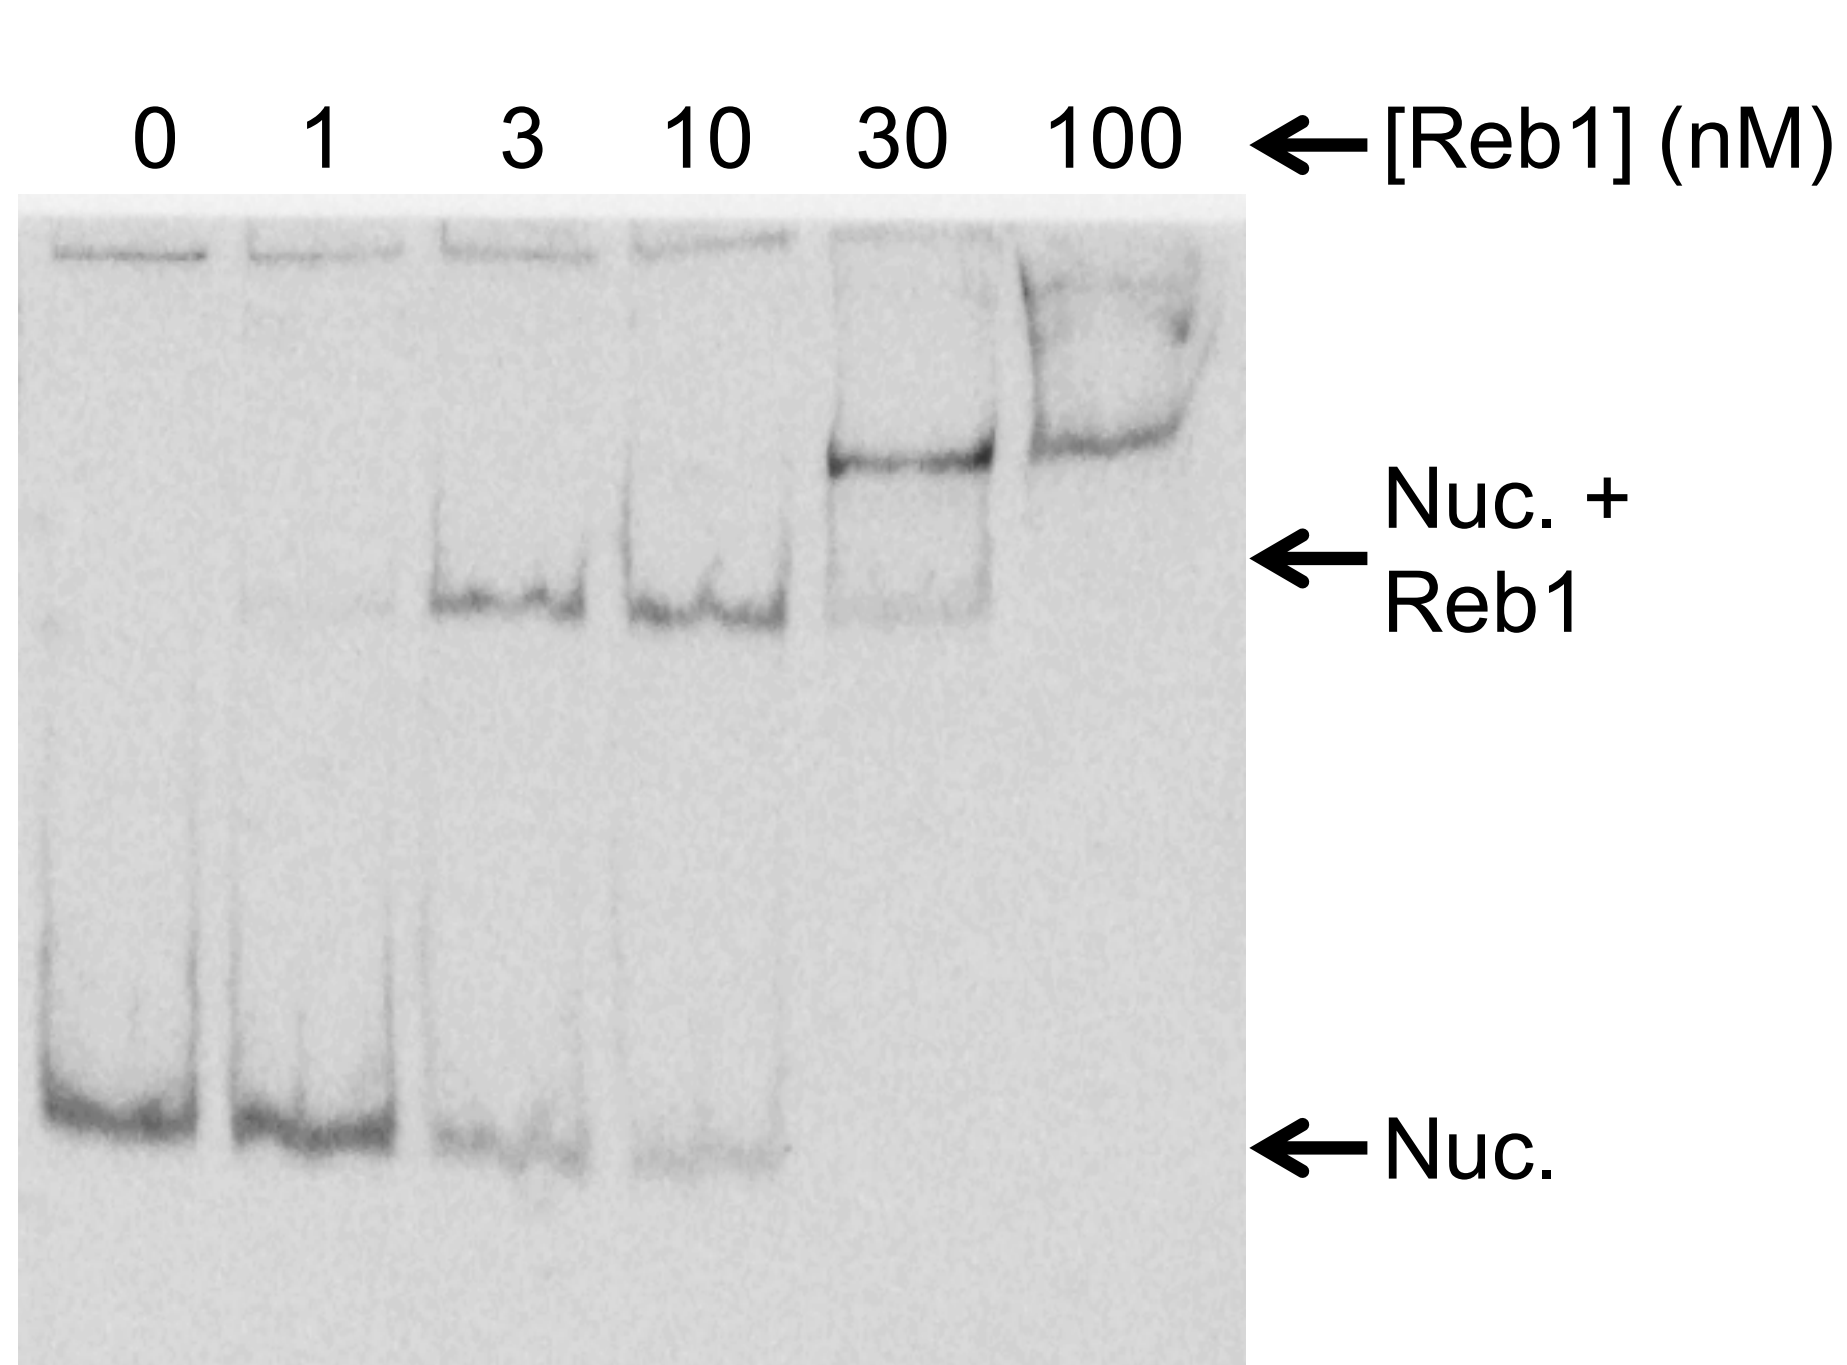**C**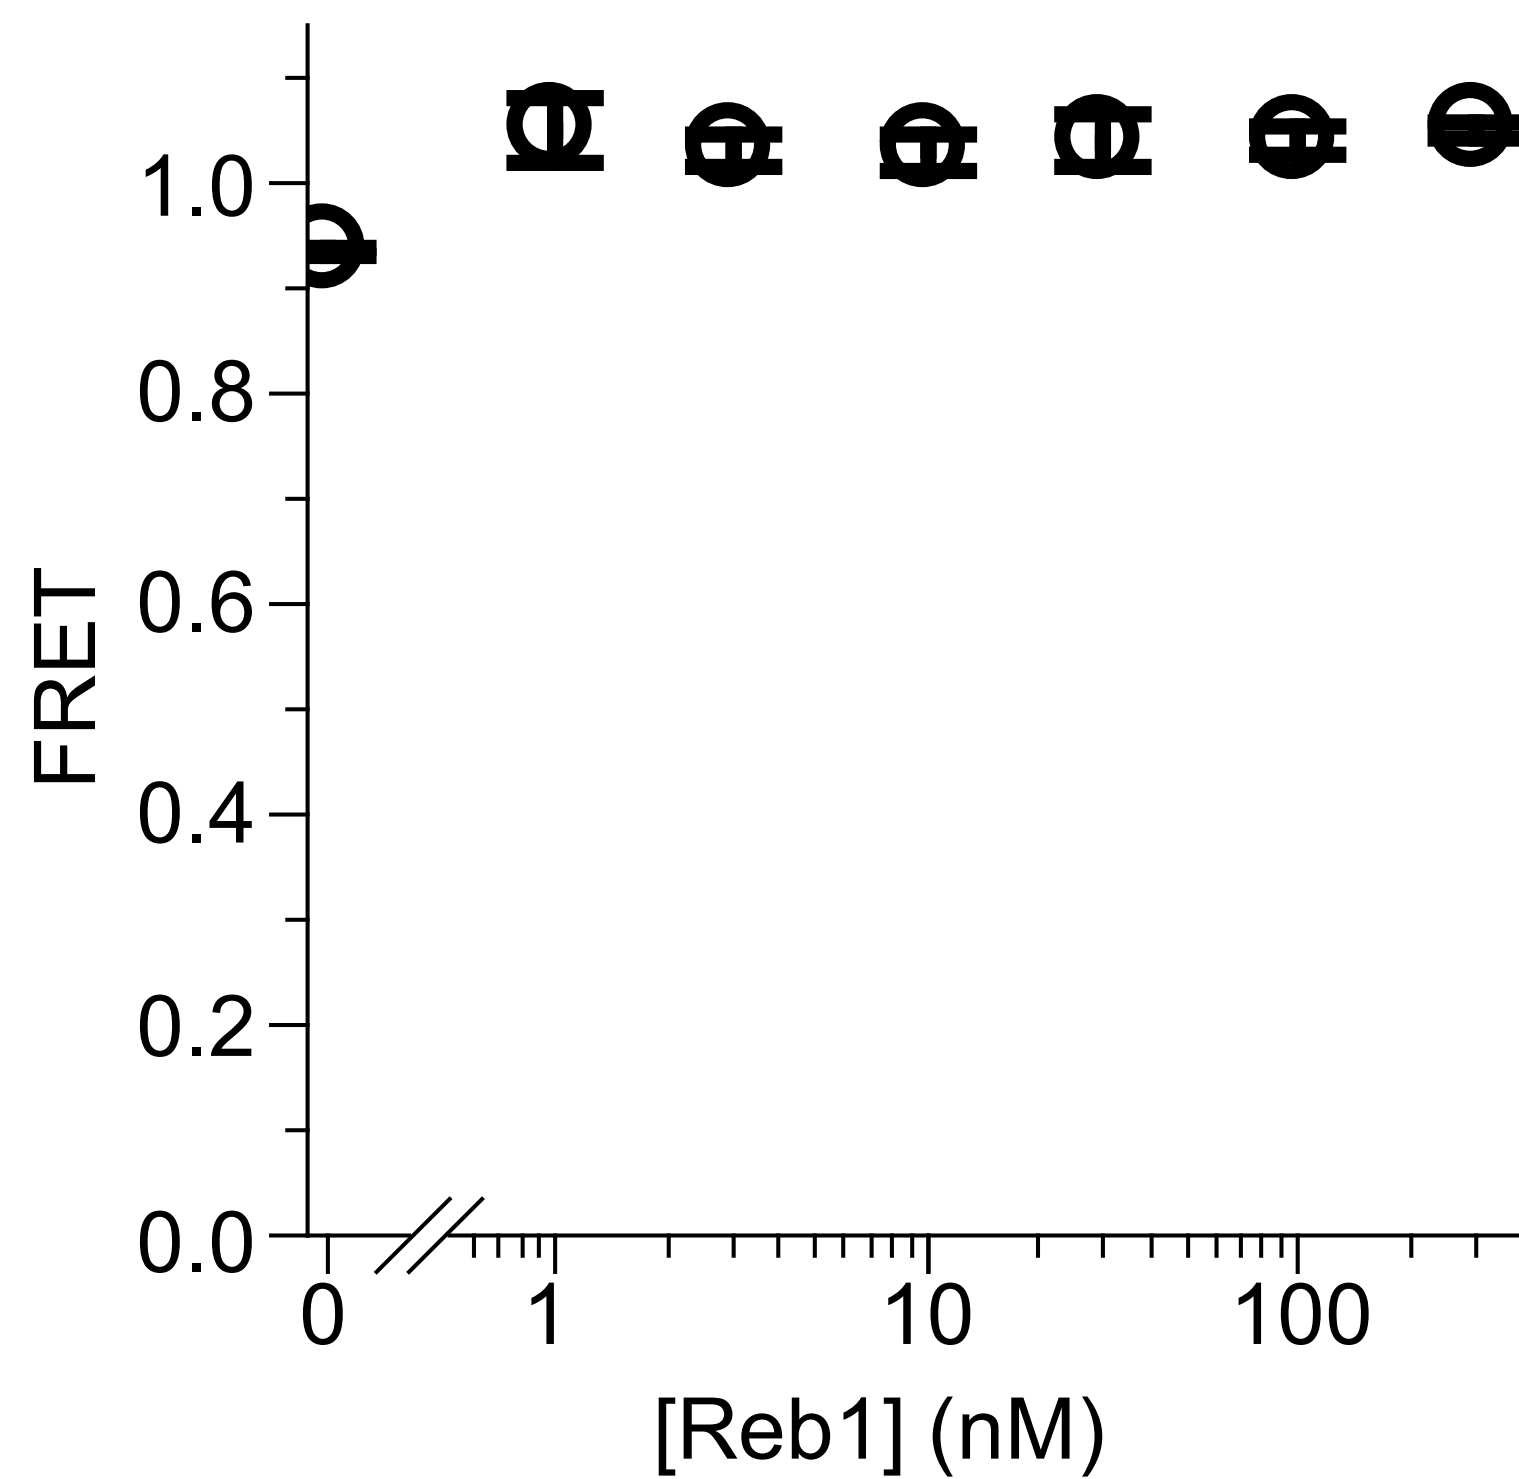

Supplement: supp [file elife-43008-supp-v1.zip]

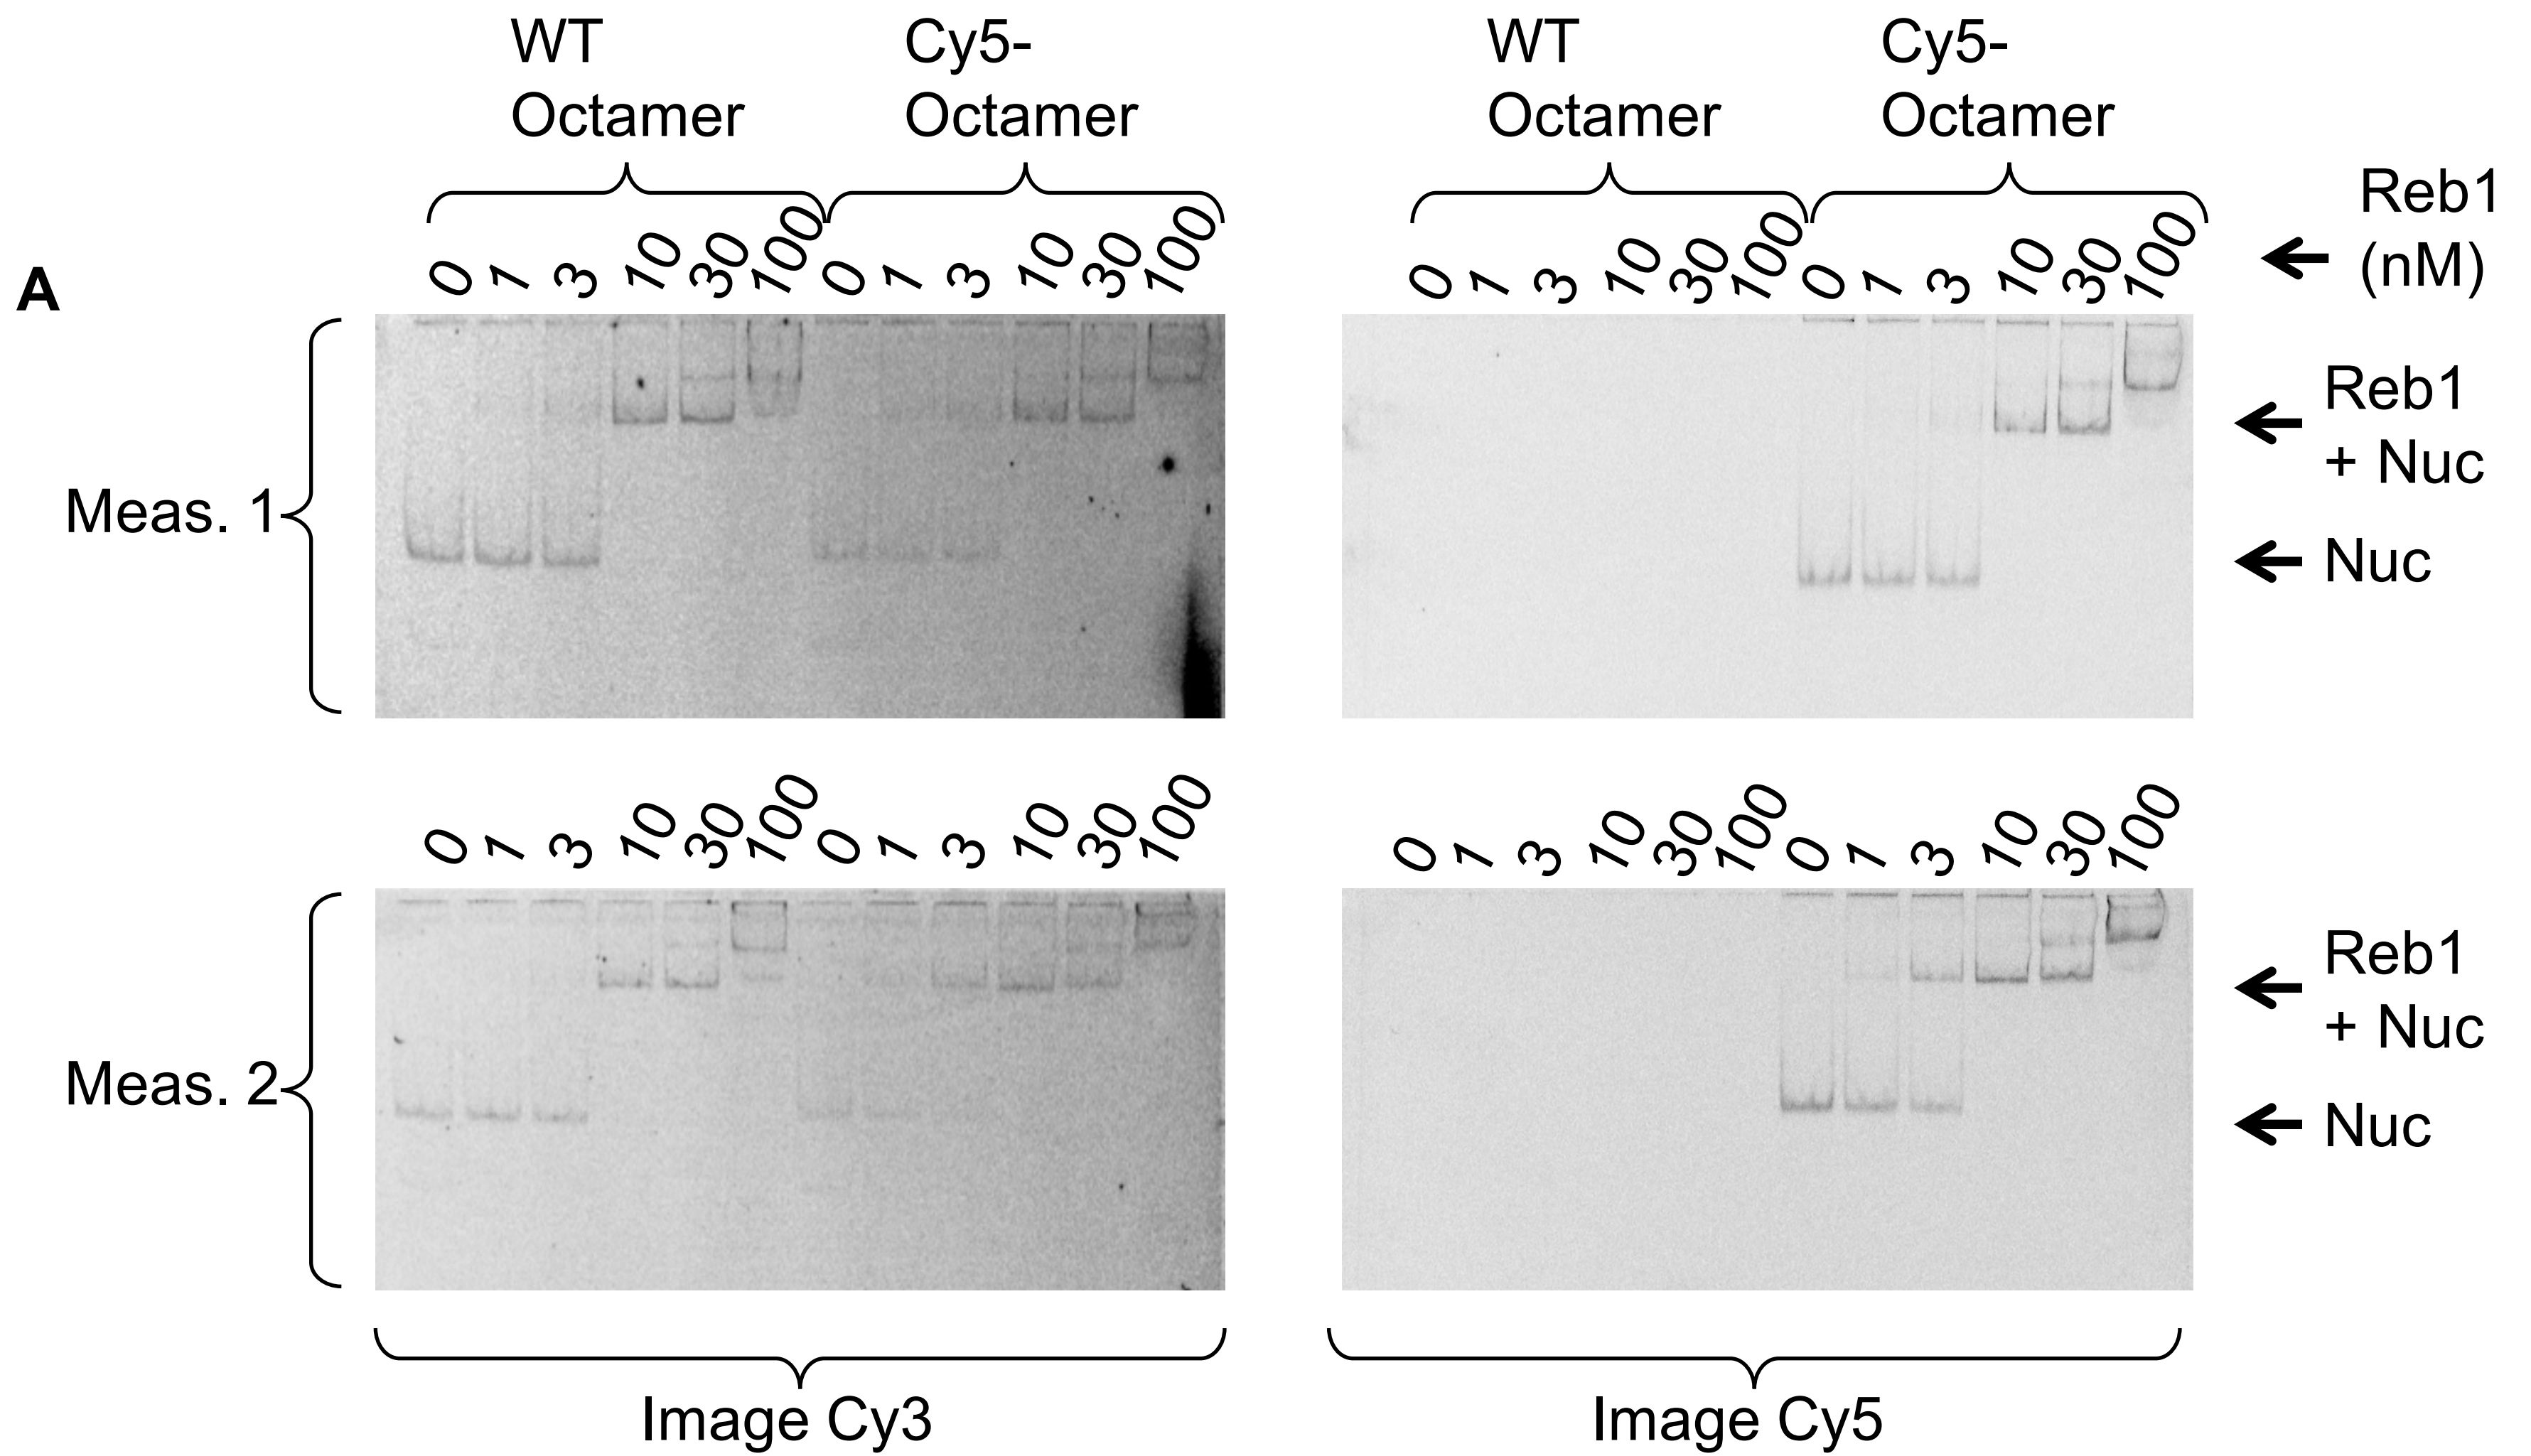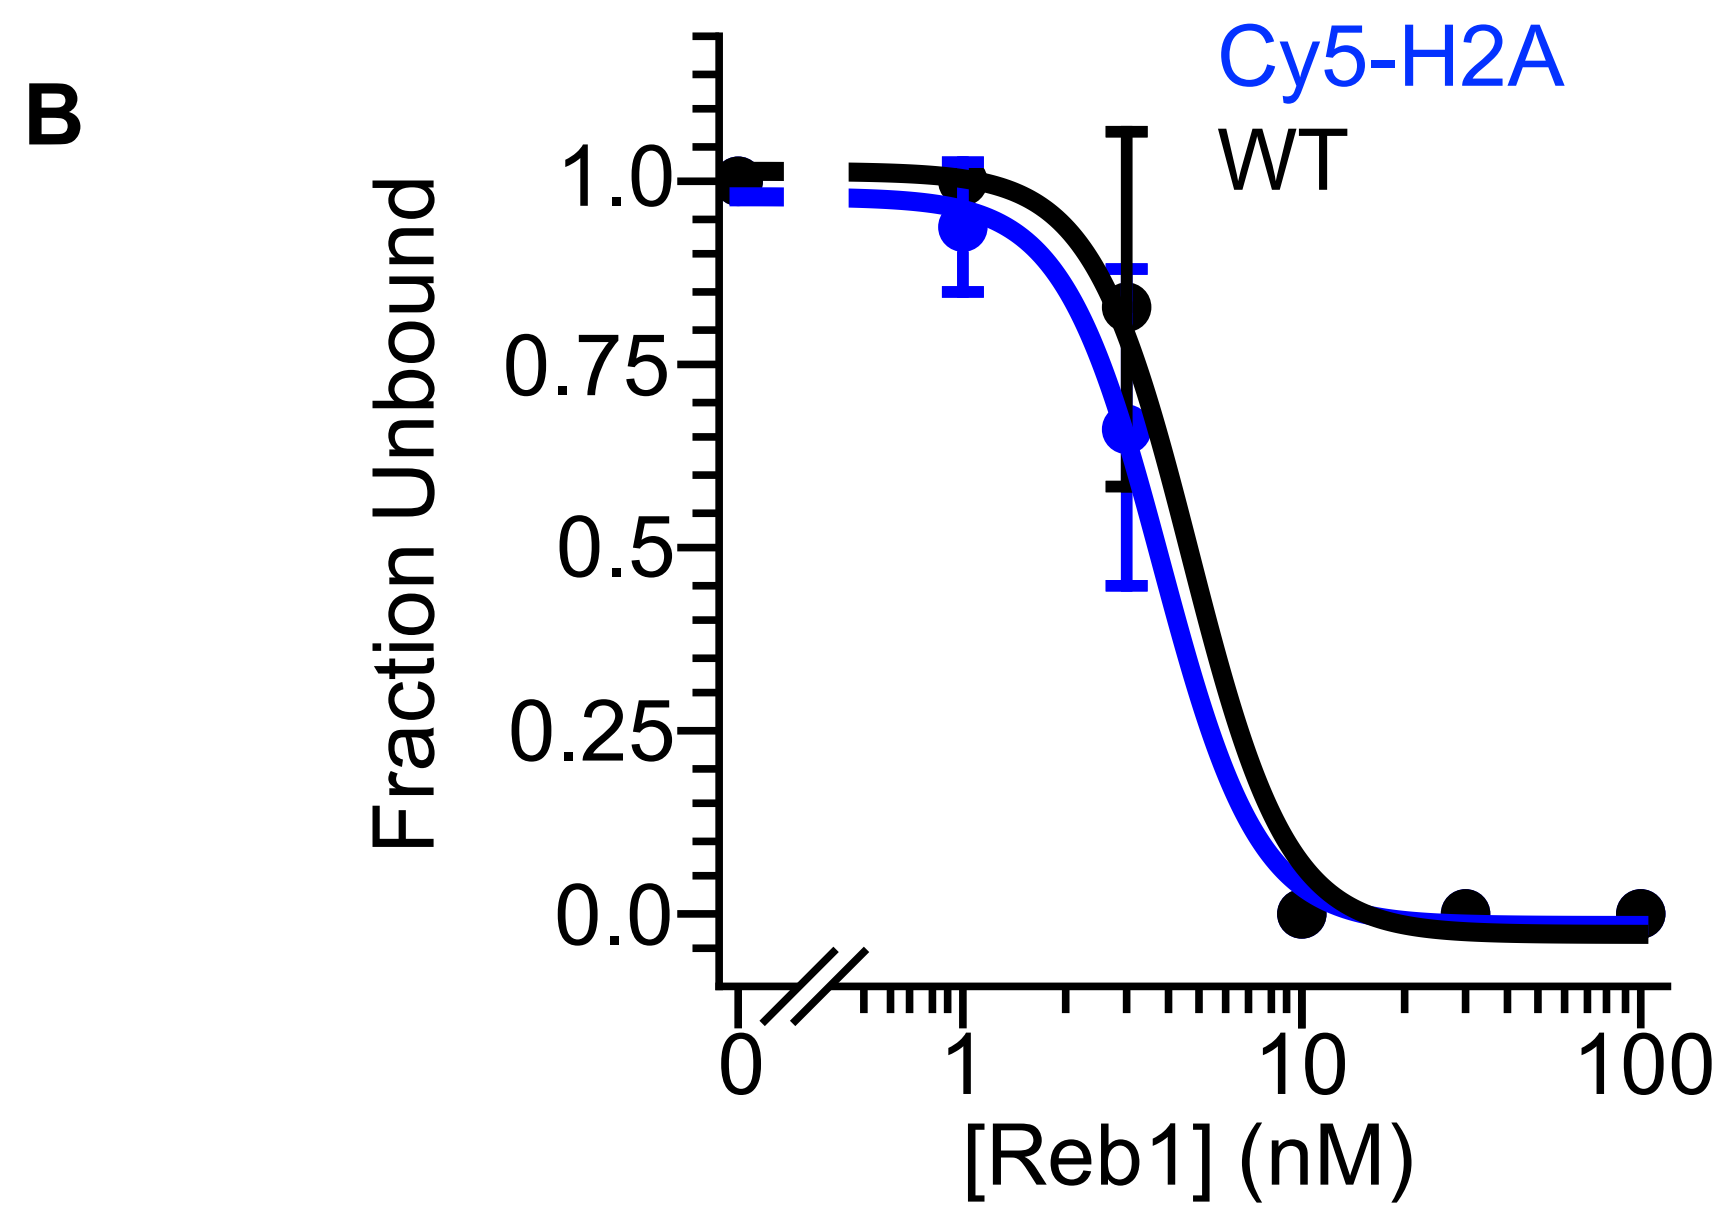

Supplement: supp [file elife-43008-supp-v1.zip]

**A**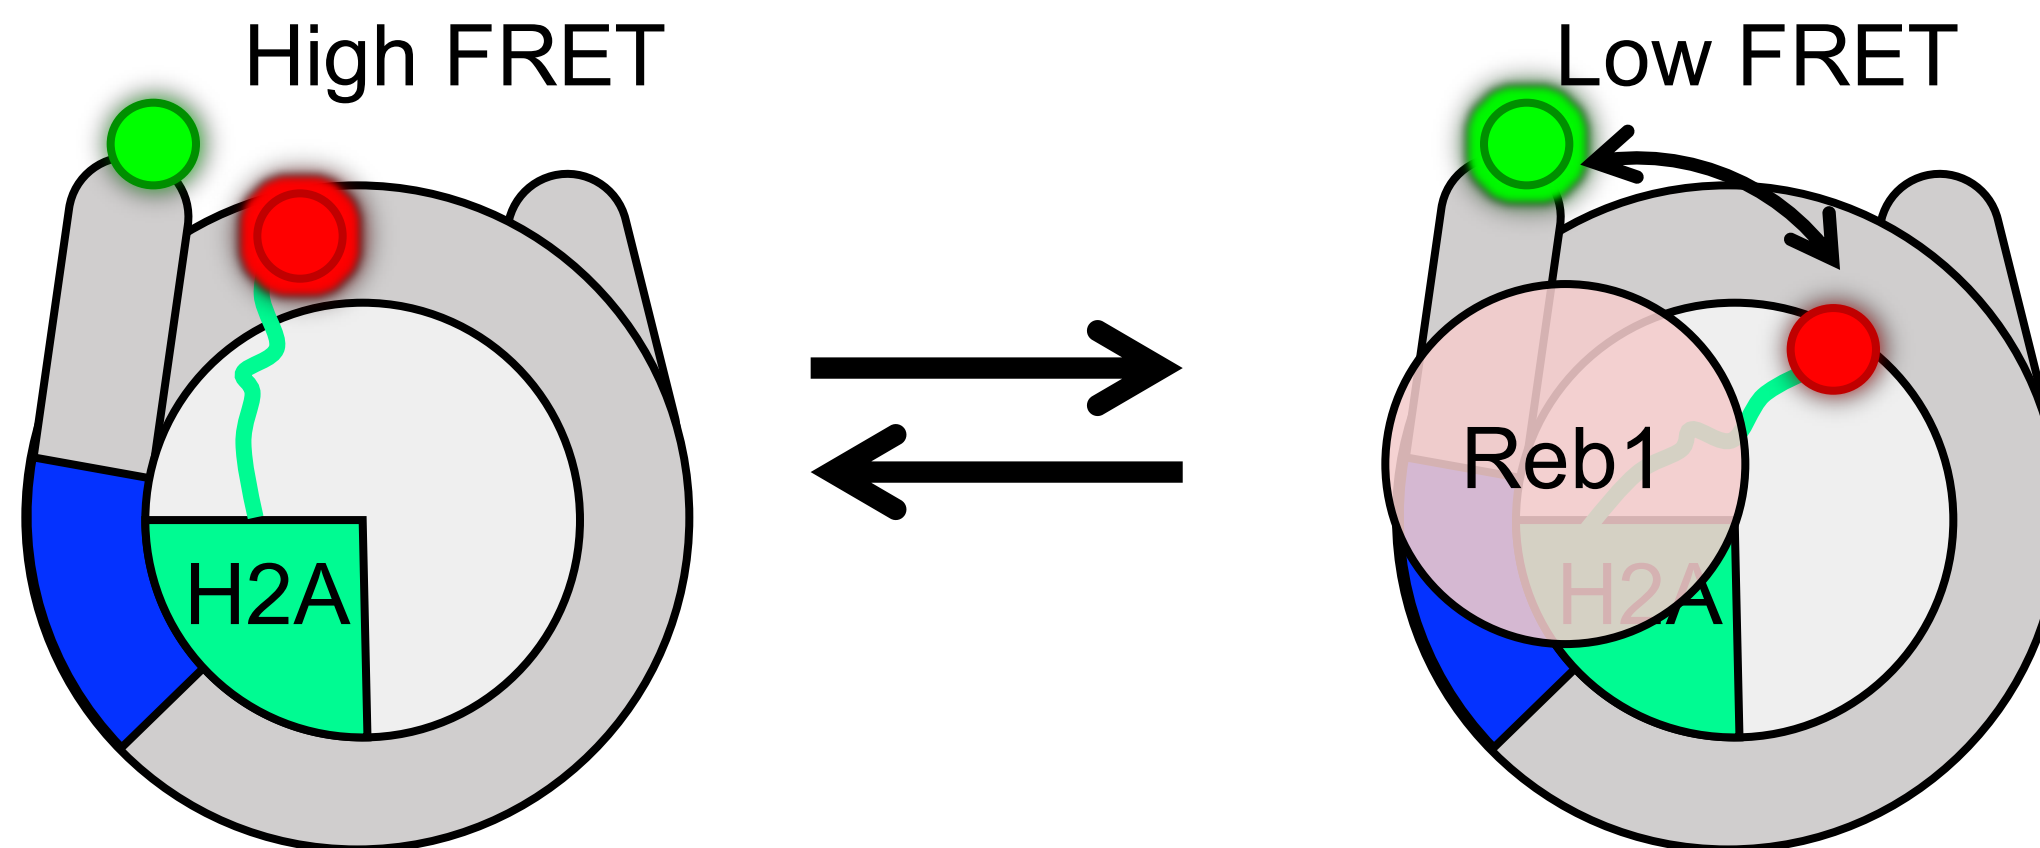**B**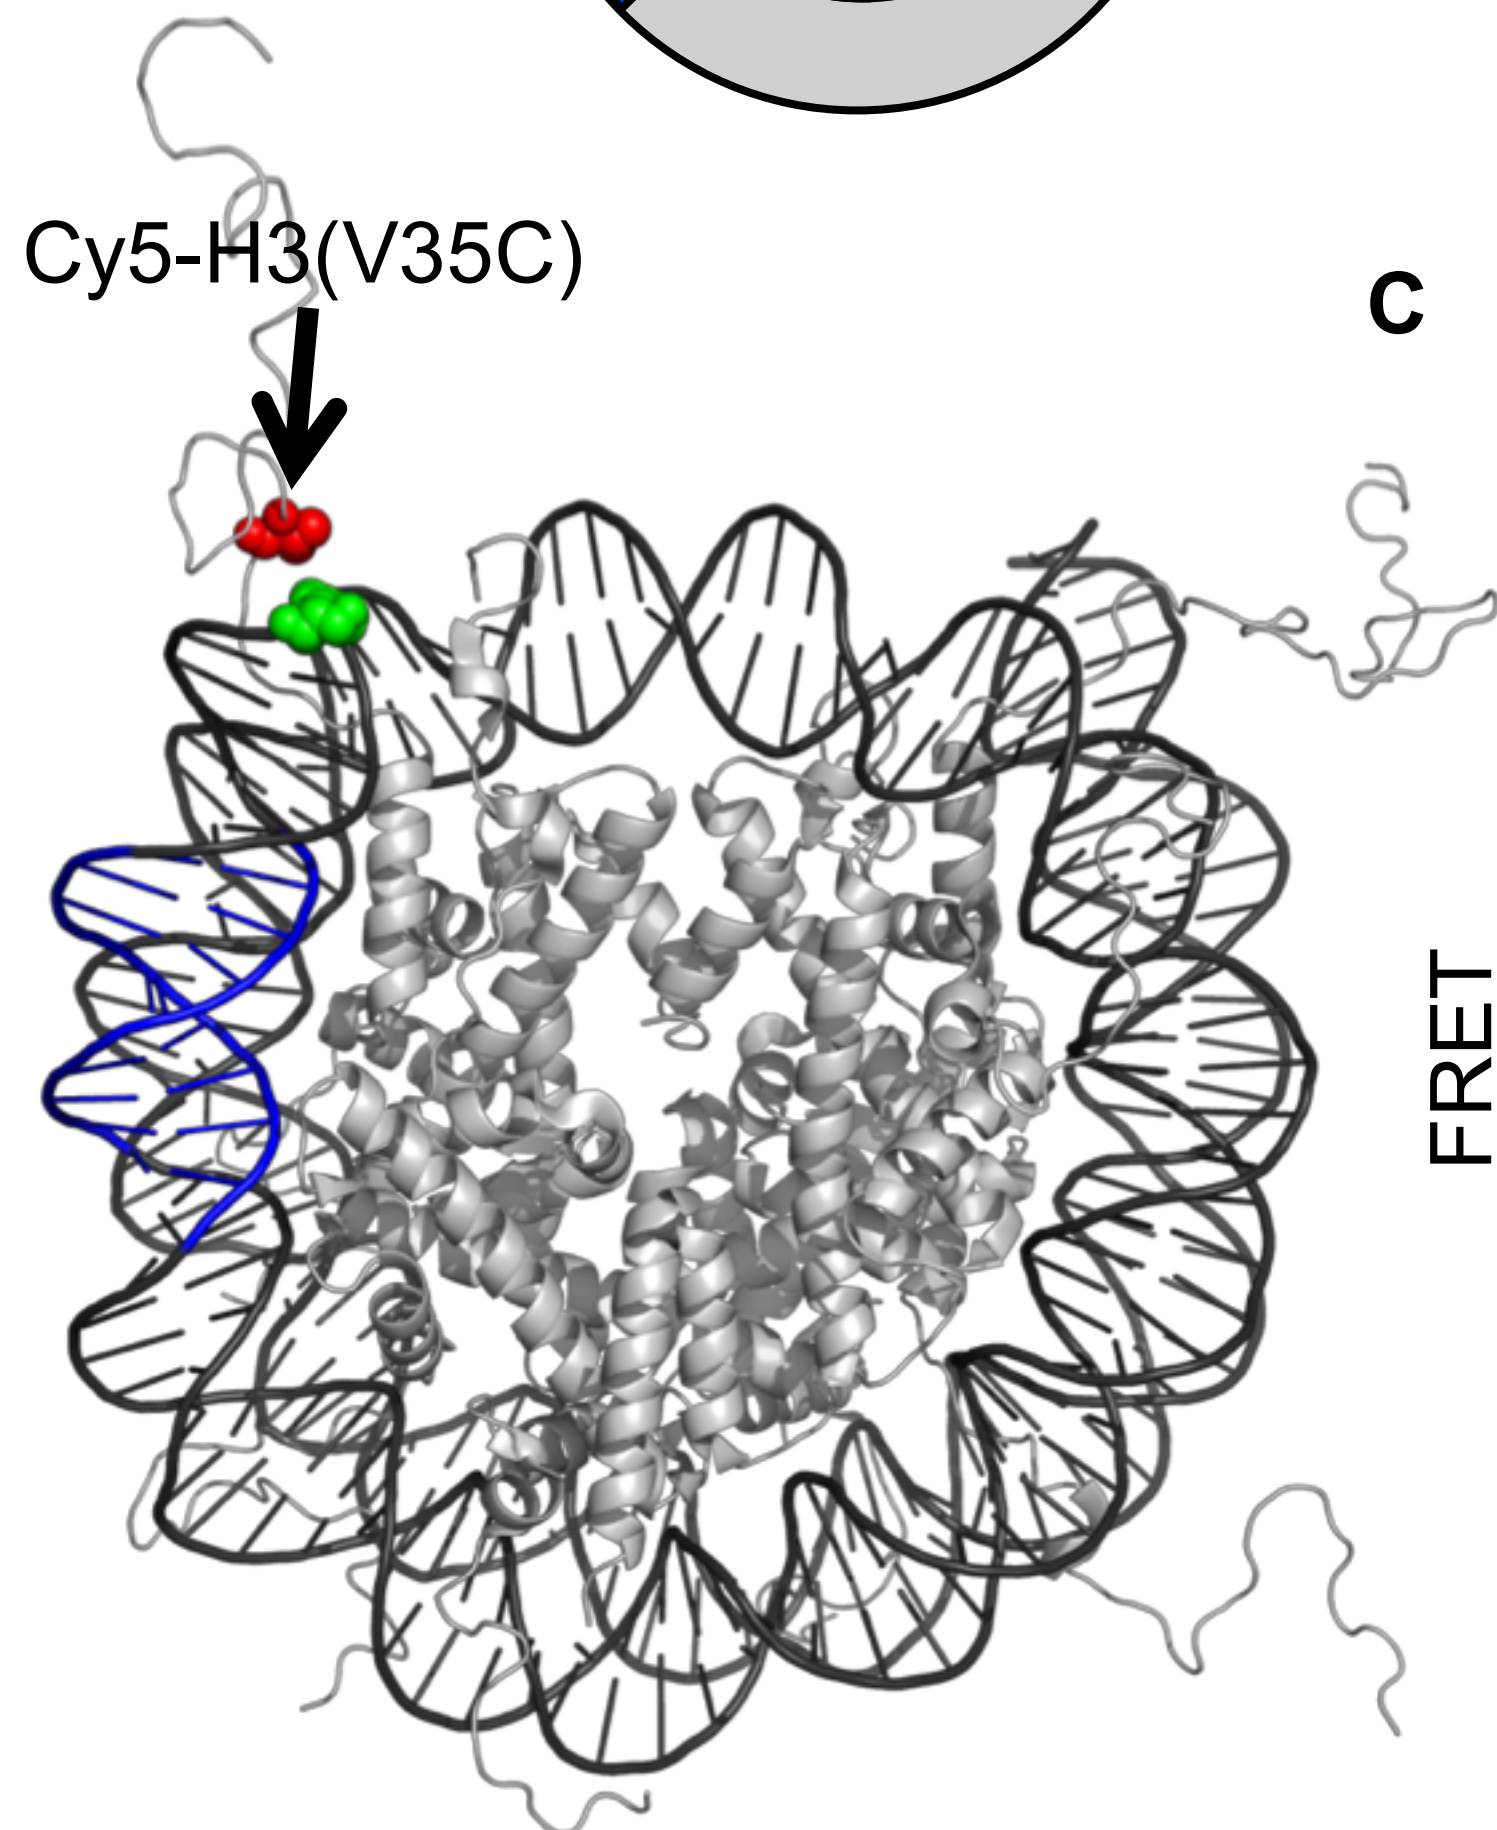**C**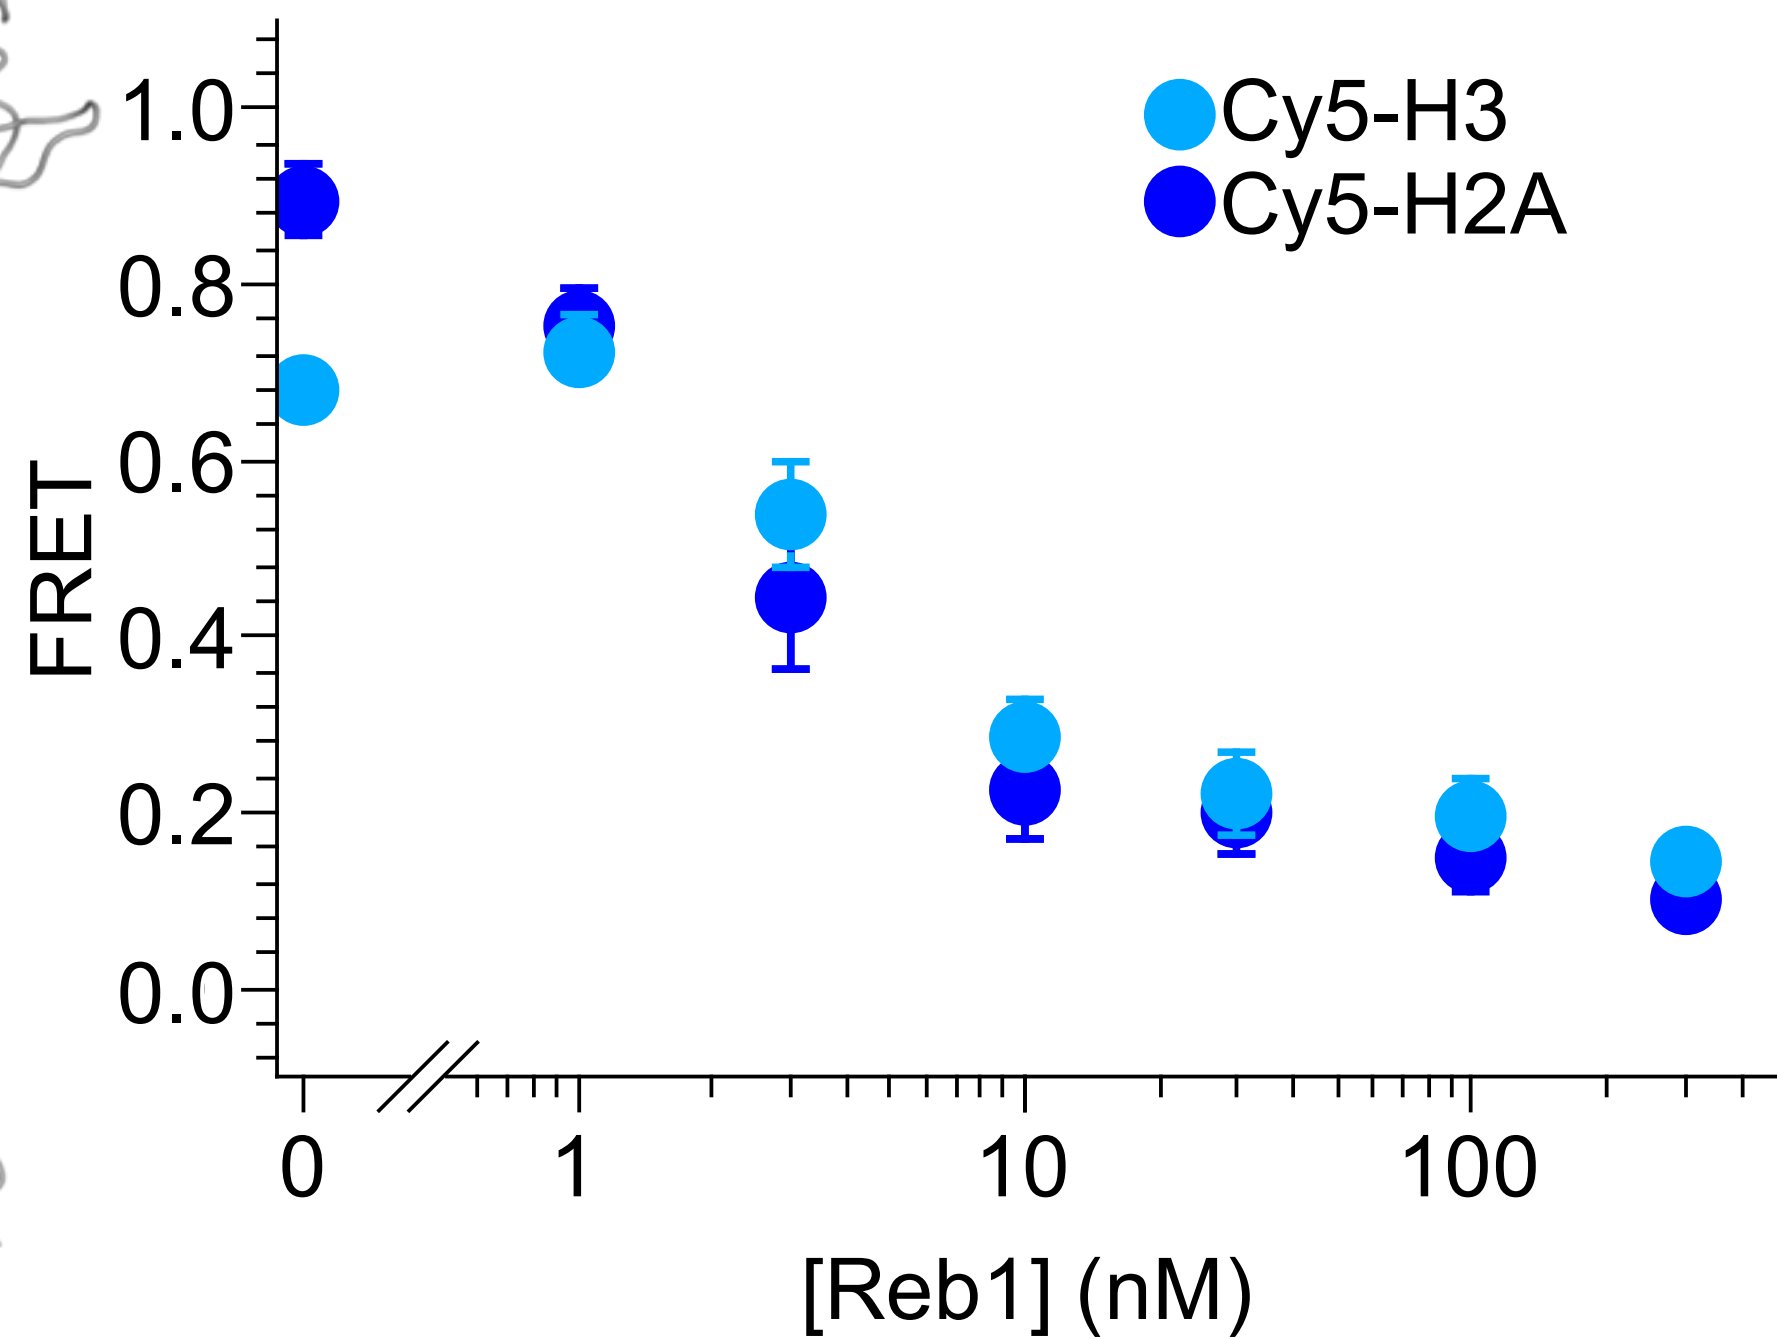

Supplement: supp [file elife-43008-supp-v1.zip]

**A**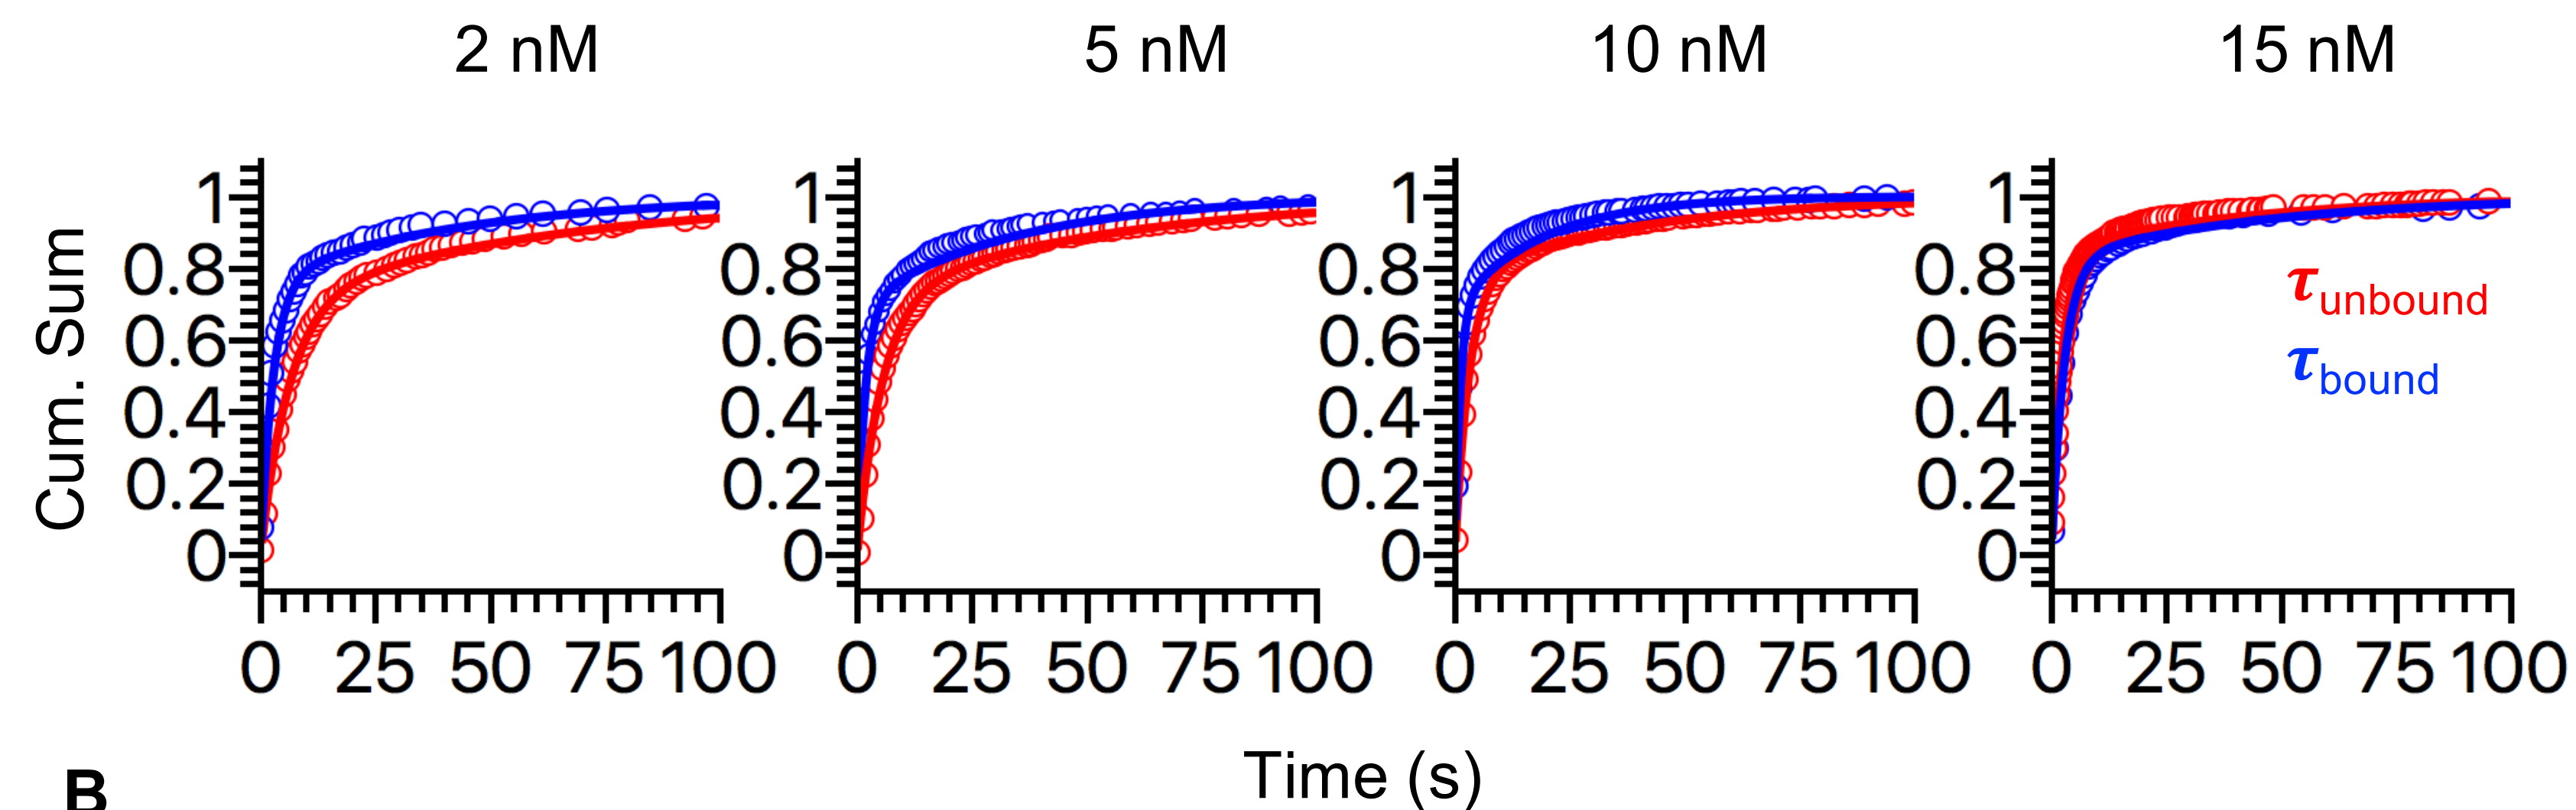**B**

| DNA              | P-value |        |        |        |
|------------------|---------|--------|--------|--------|
| Measurement      | 2 nM    | 5 nM   | 10 nM  | 15 nM  |
| $k_{\text{off}}$ | <1E-16  | <1E-16 | <1E-16 | <1E-16 |
| $k_{\text{on}}$  | <1E-16  | <1E-16 | <1E-16 | <1E-16 |

**C**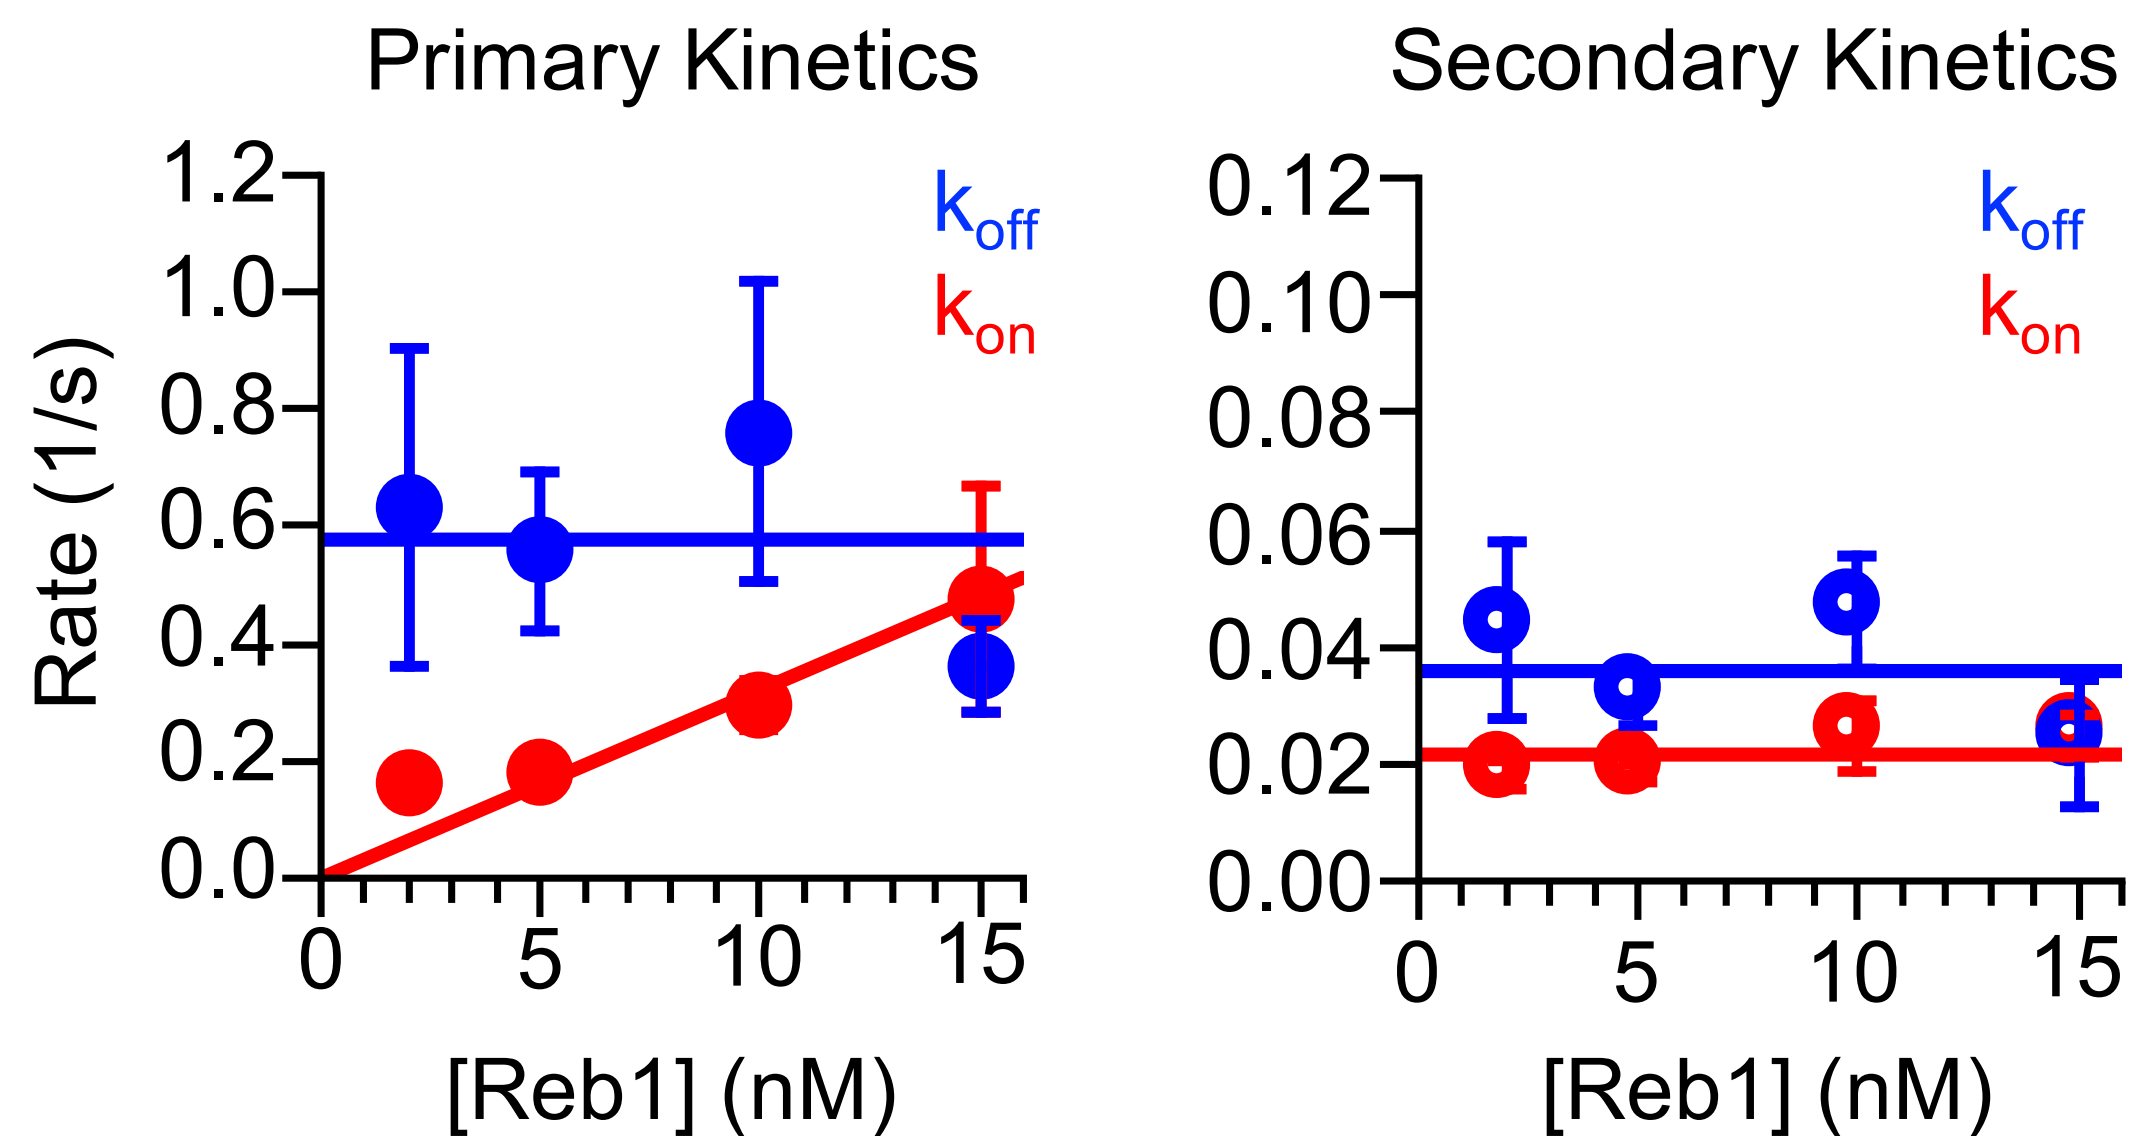**D**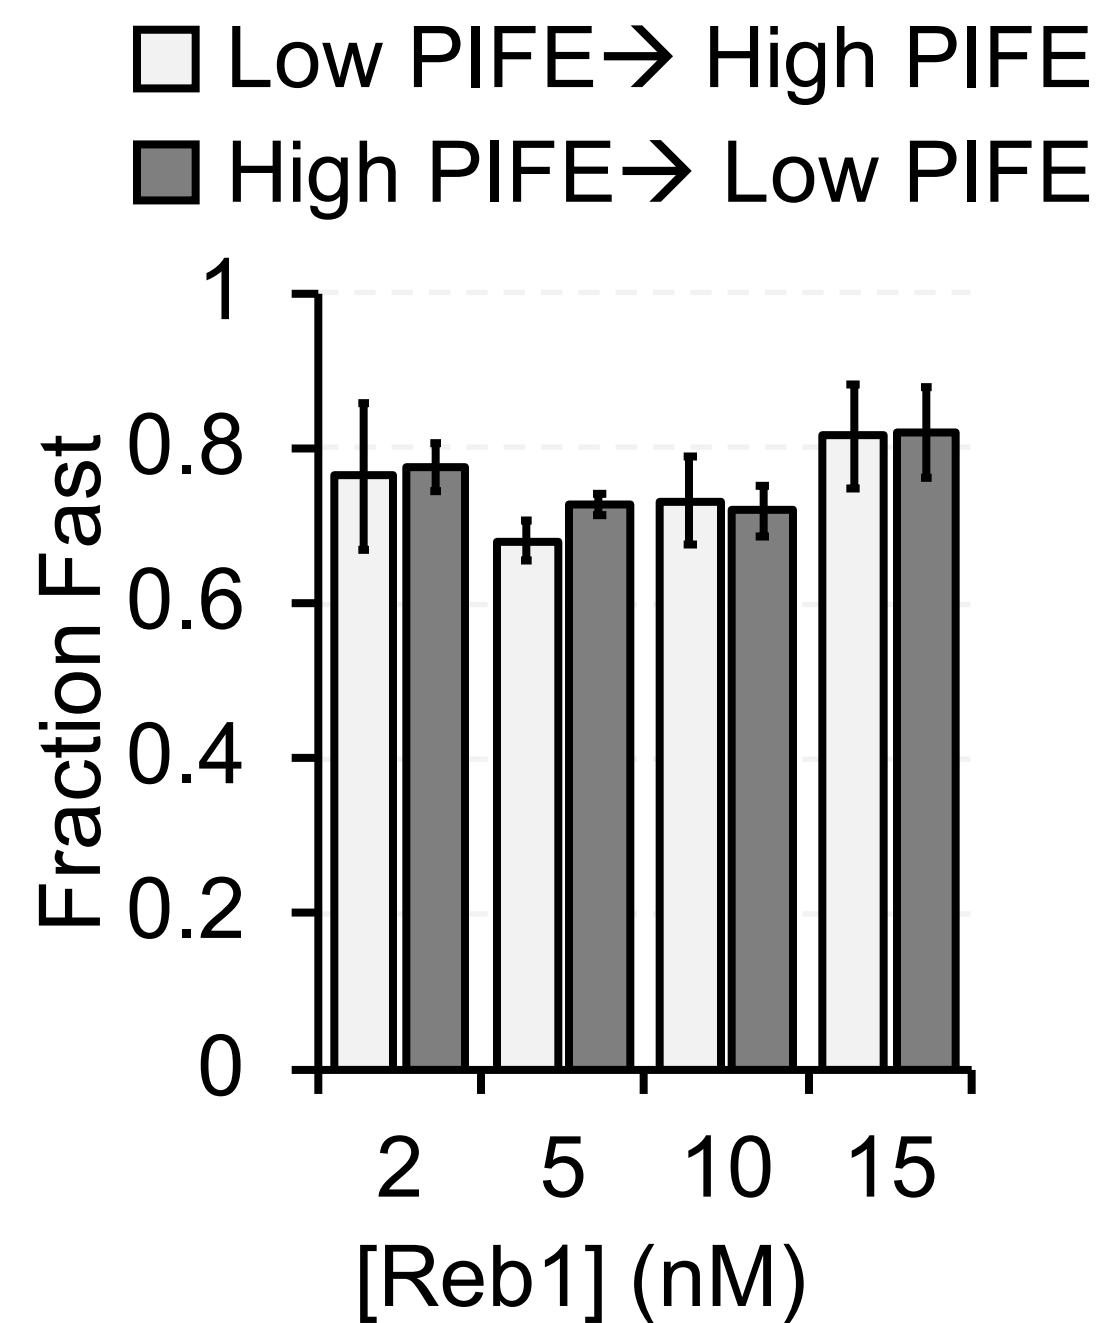

Supplement: supp [file elife-43008-supp-v1.zip]

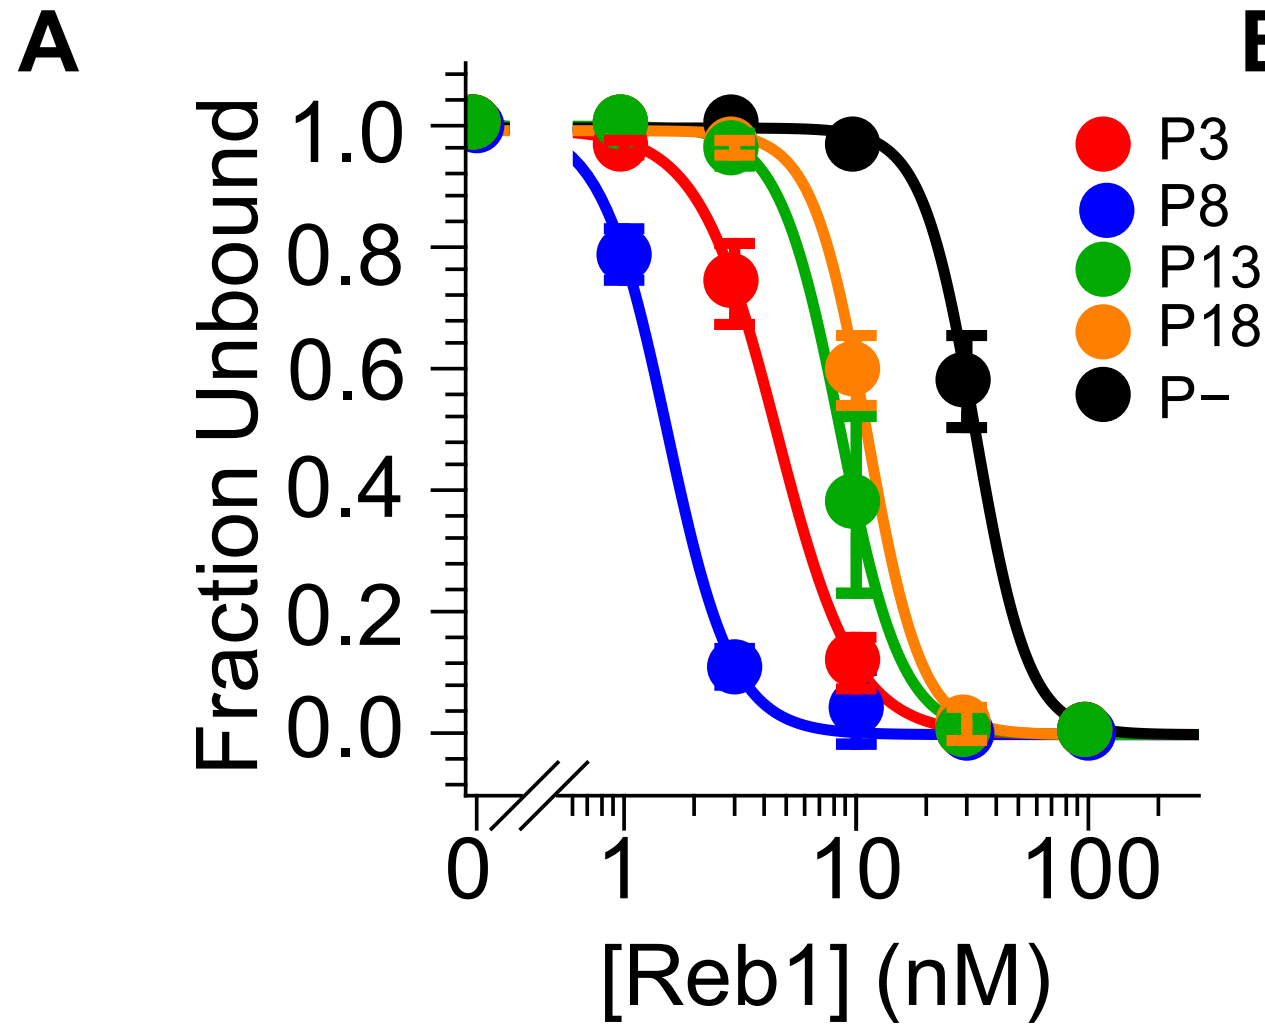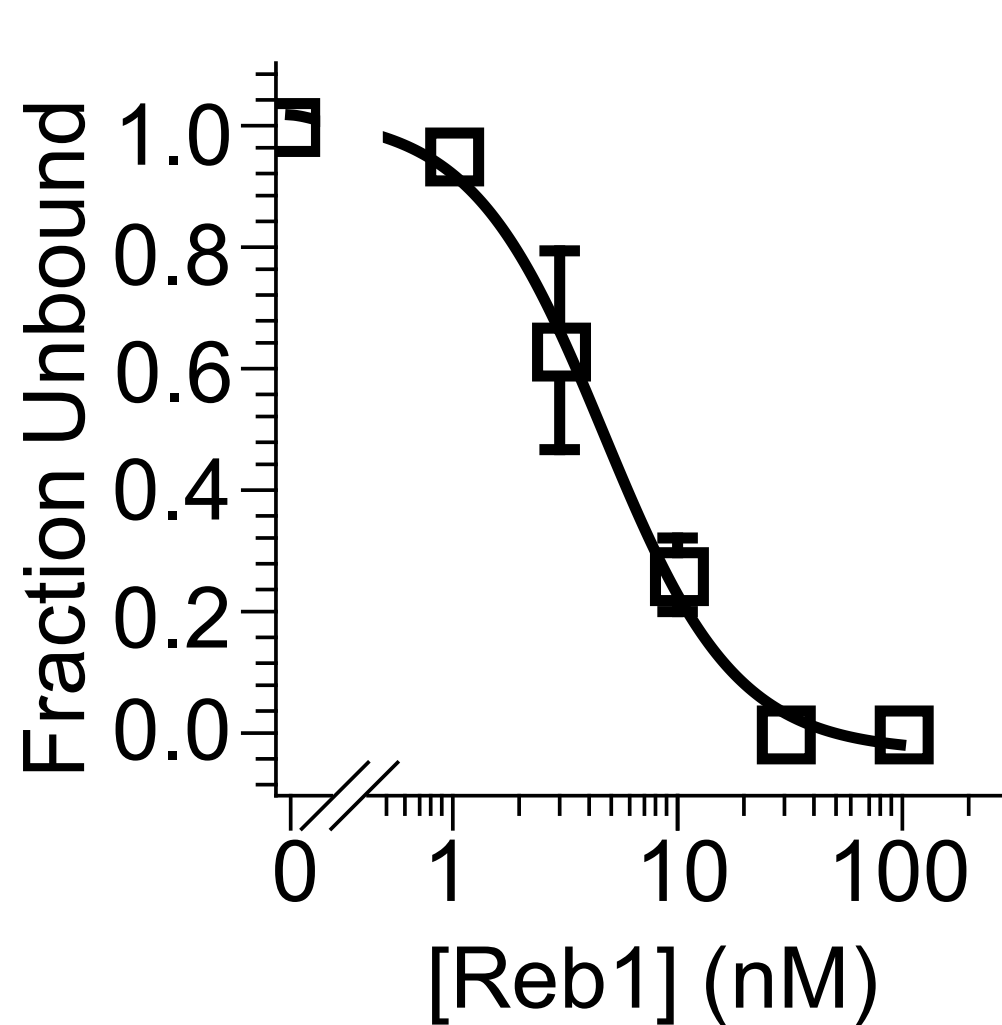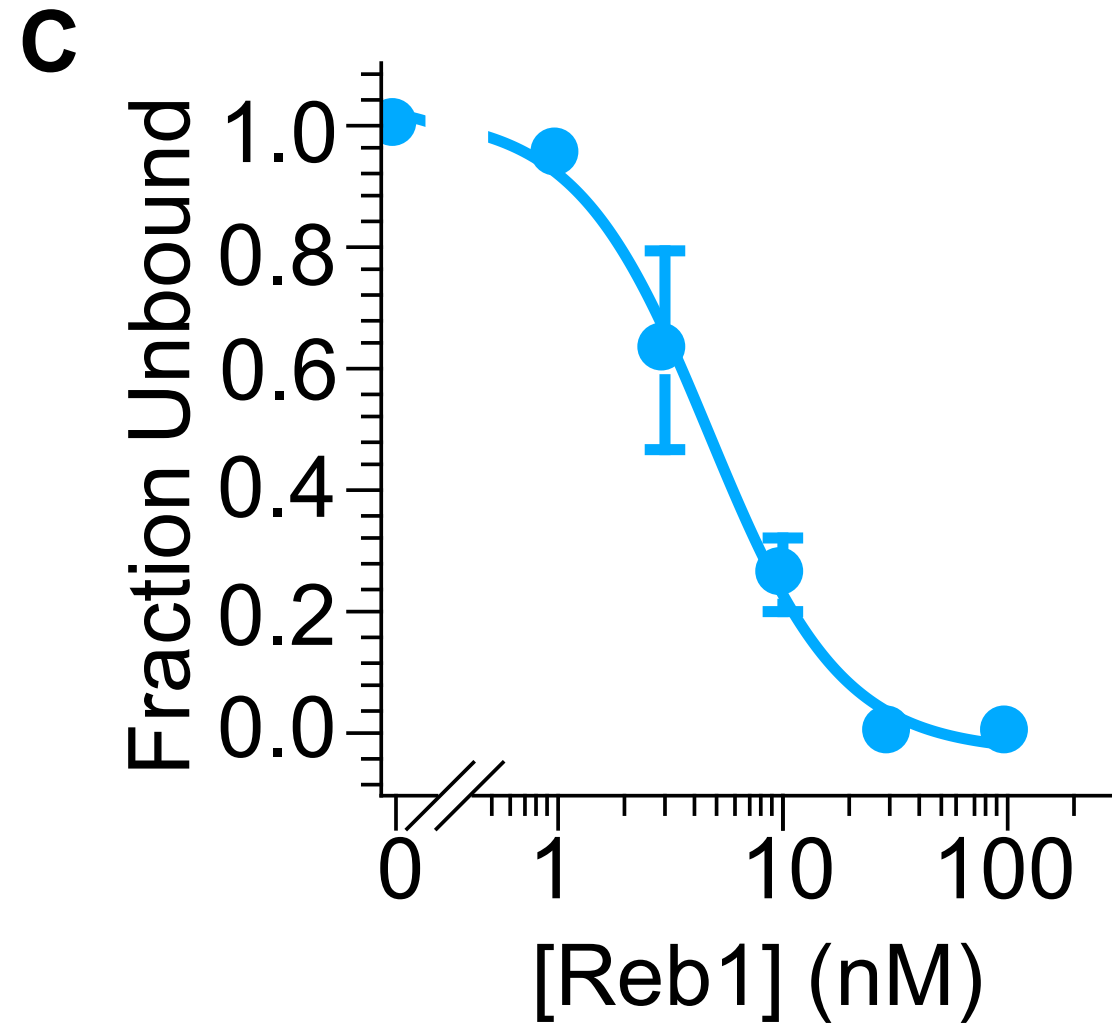

Supplement: supp [file elife-43008-supp-v1.zip]

**A**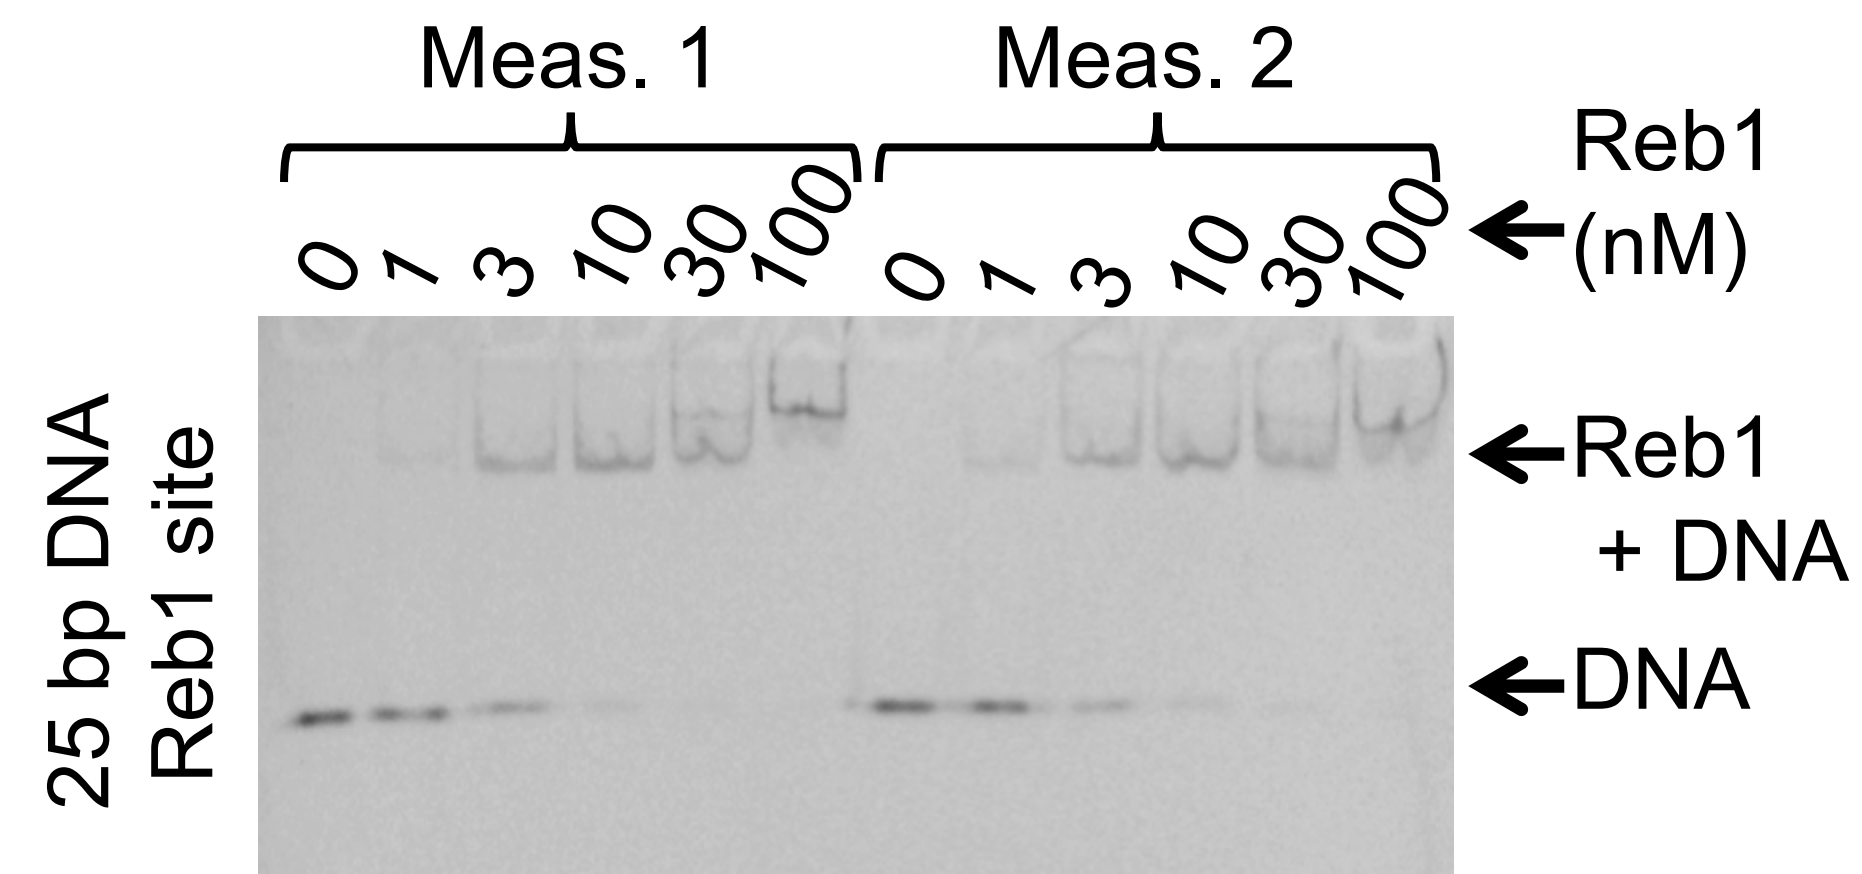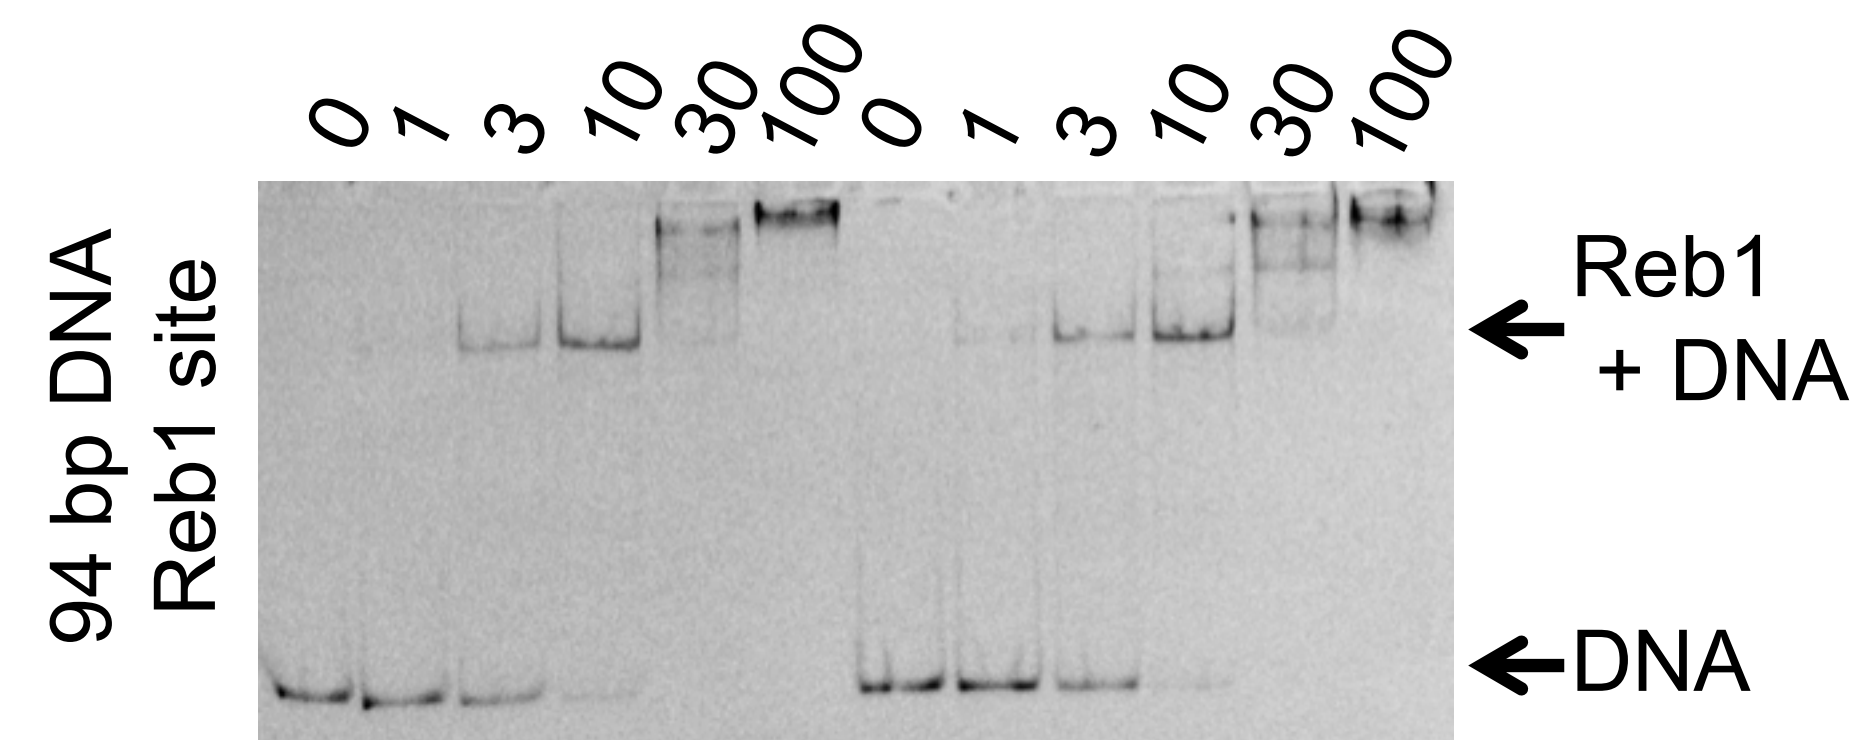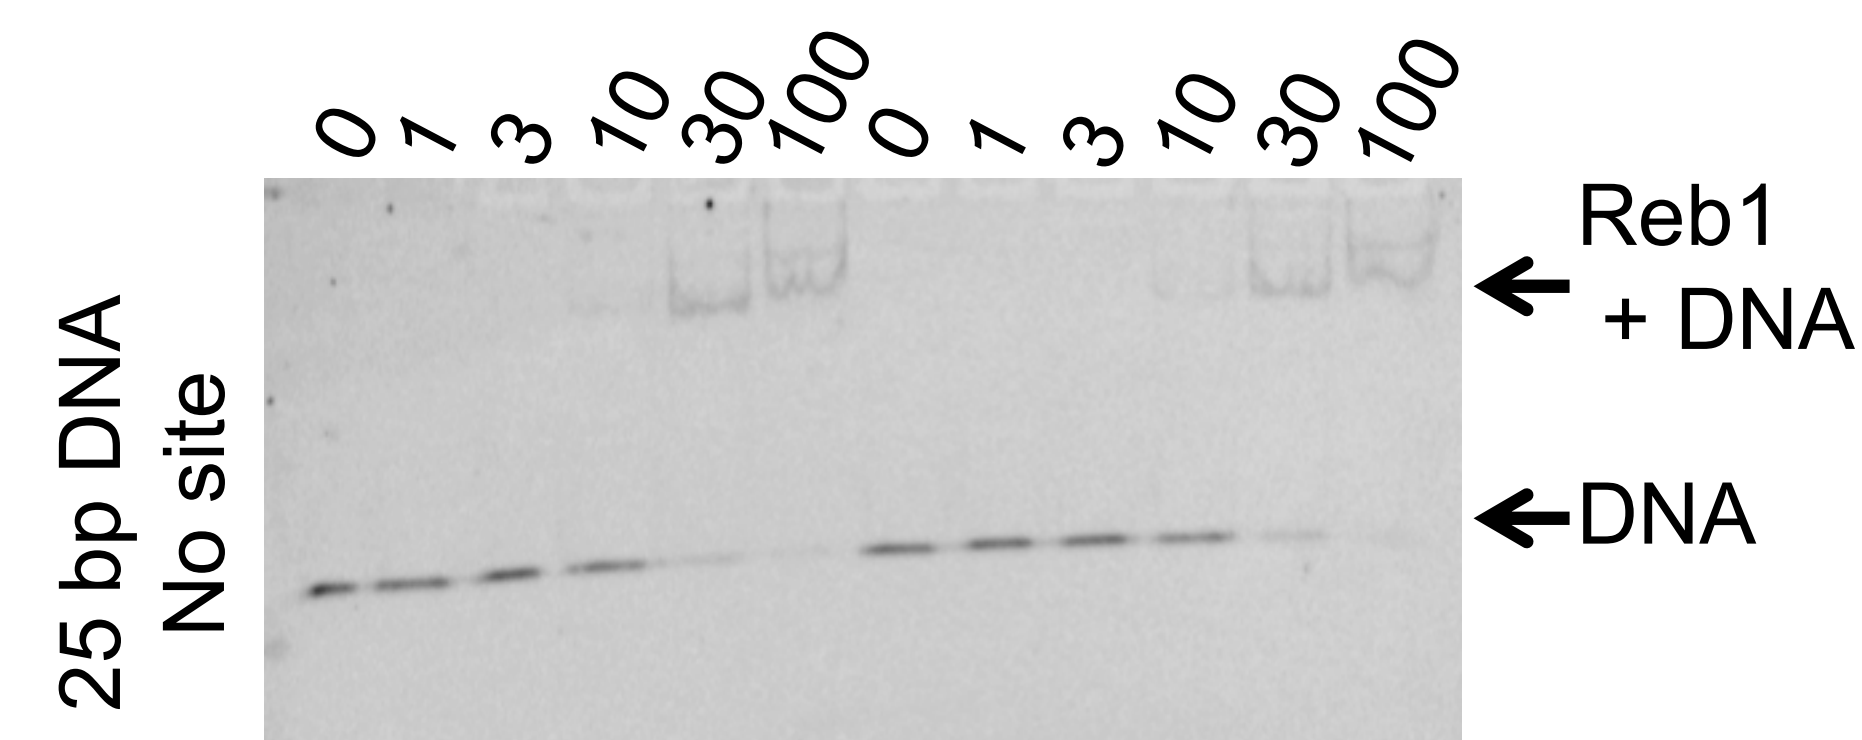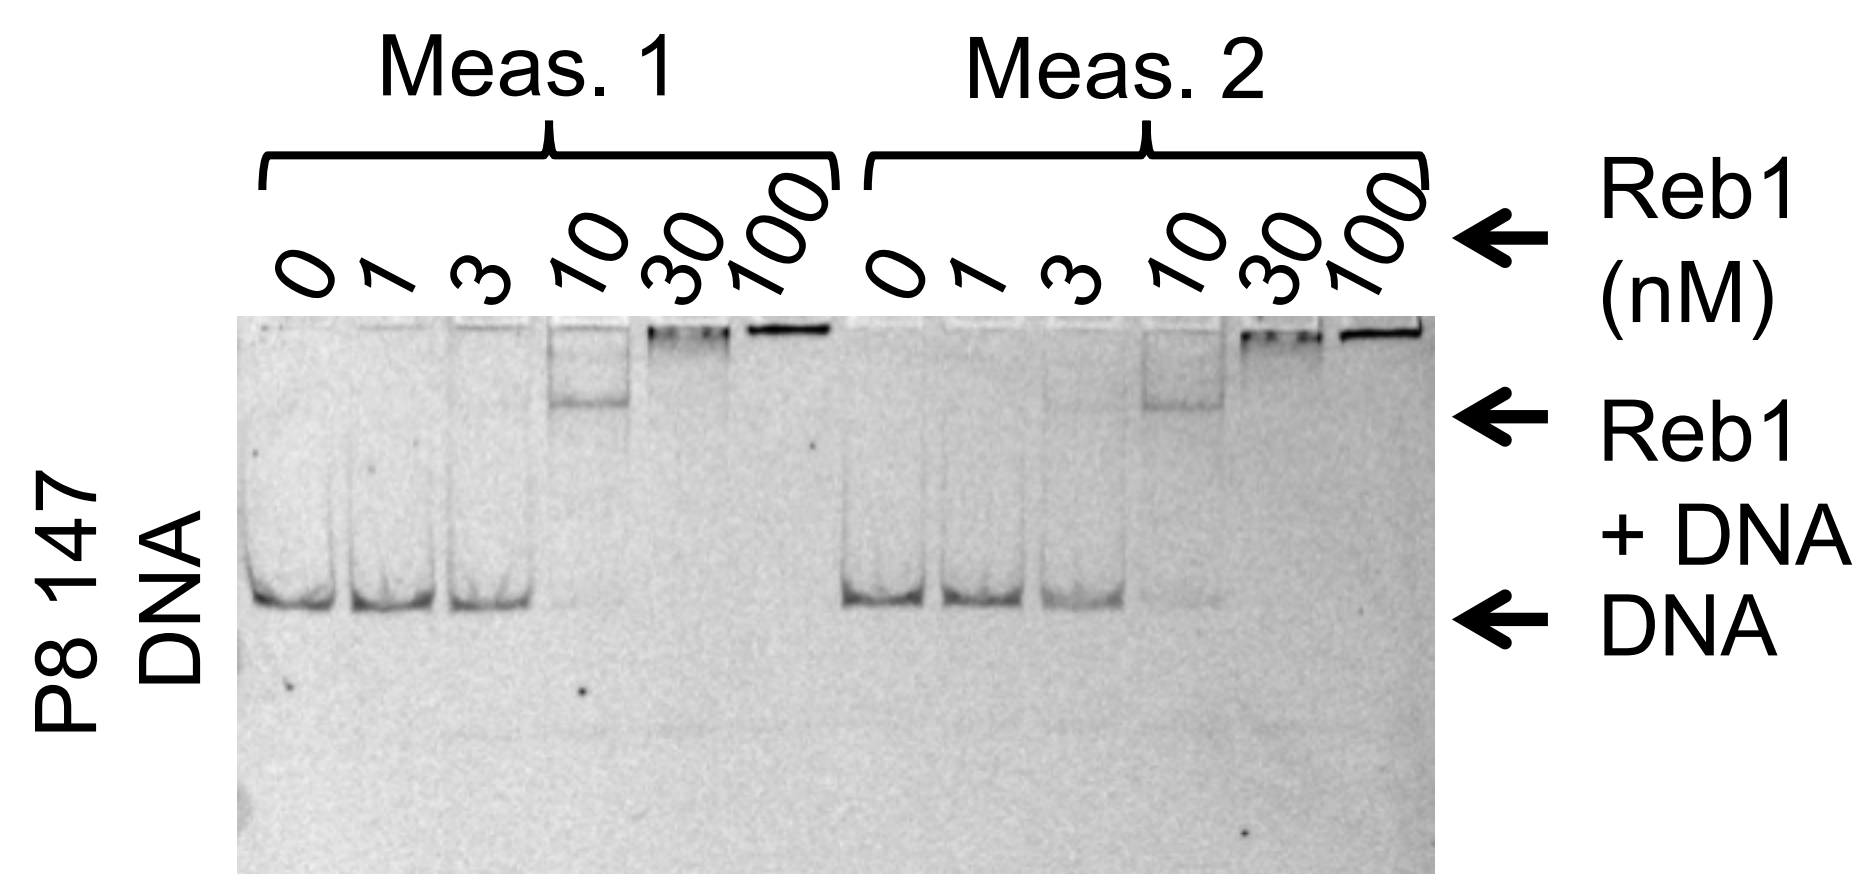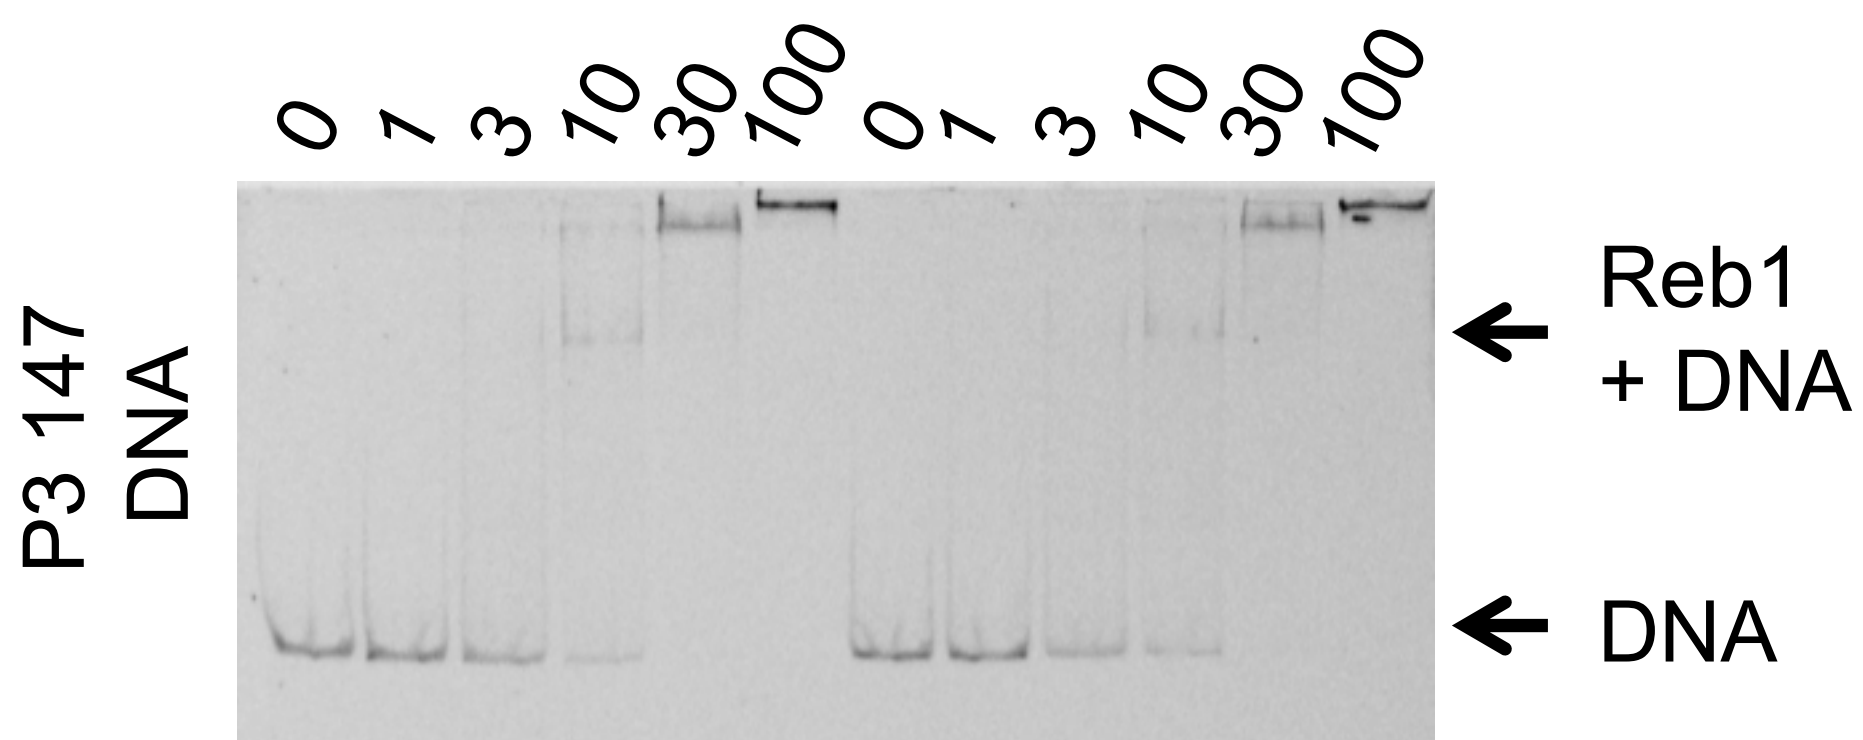**B**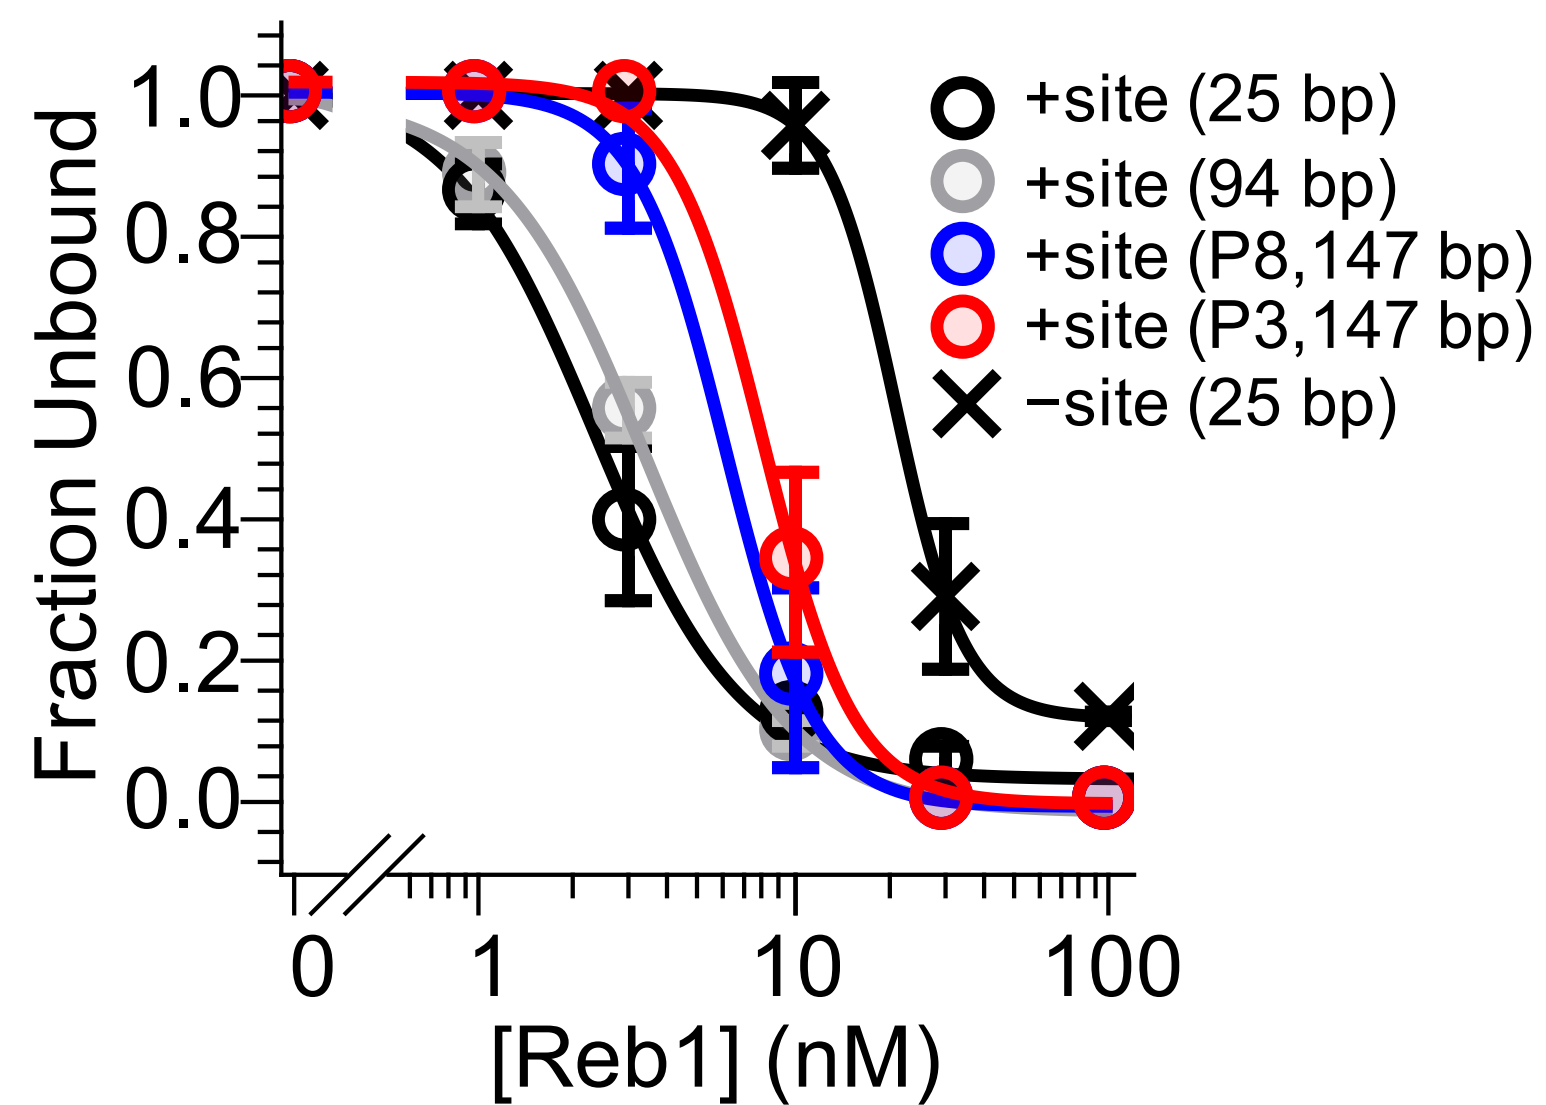

Supplement: supp [file elife-43008-supp-v1.zip]

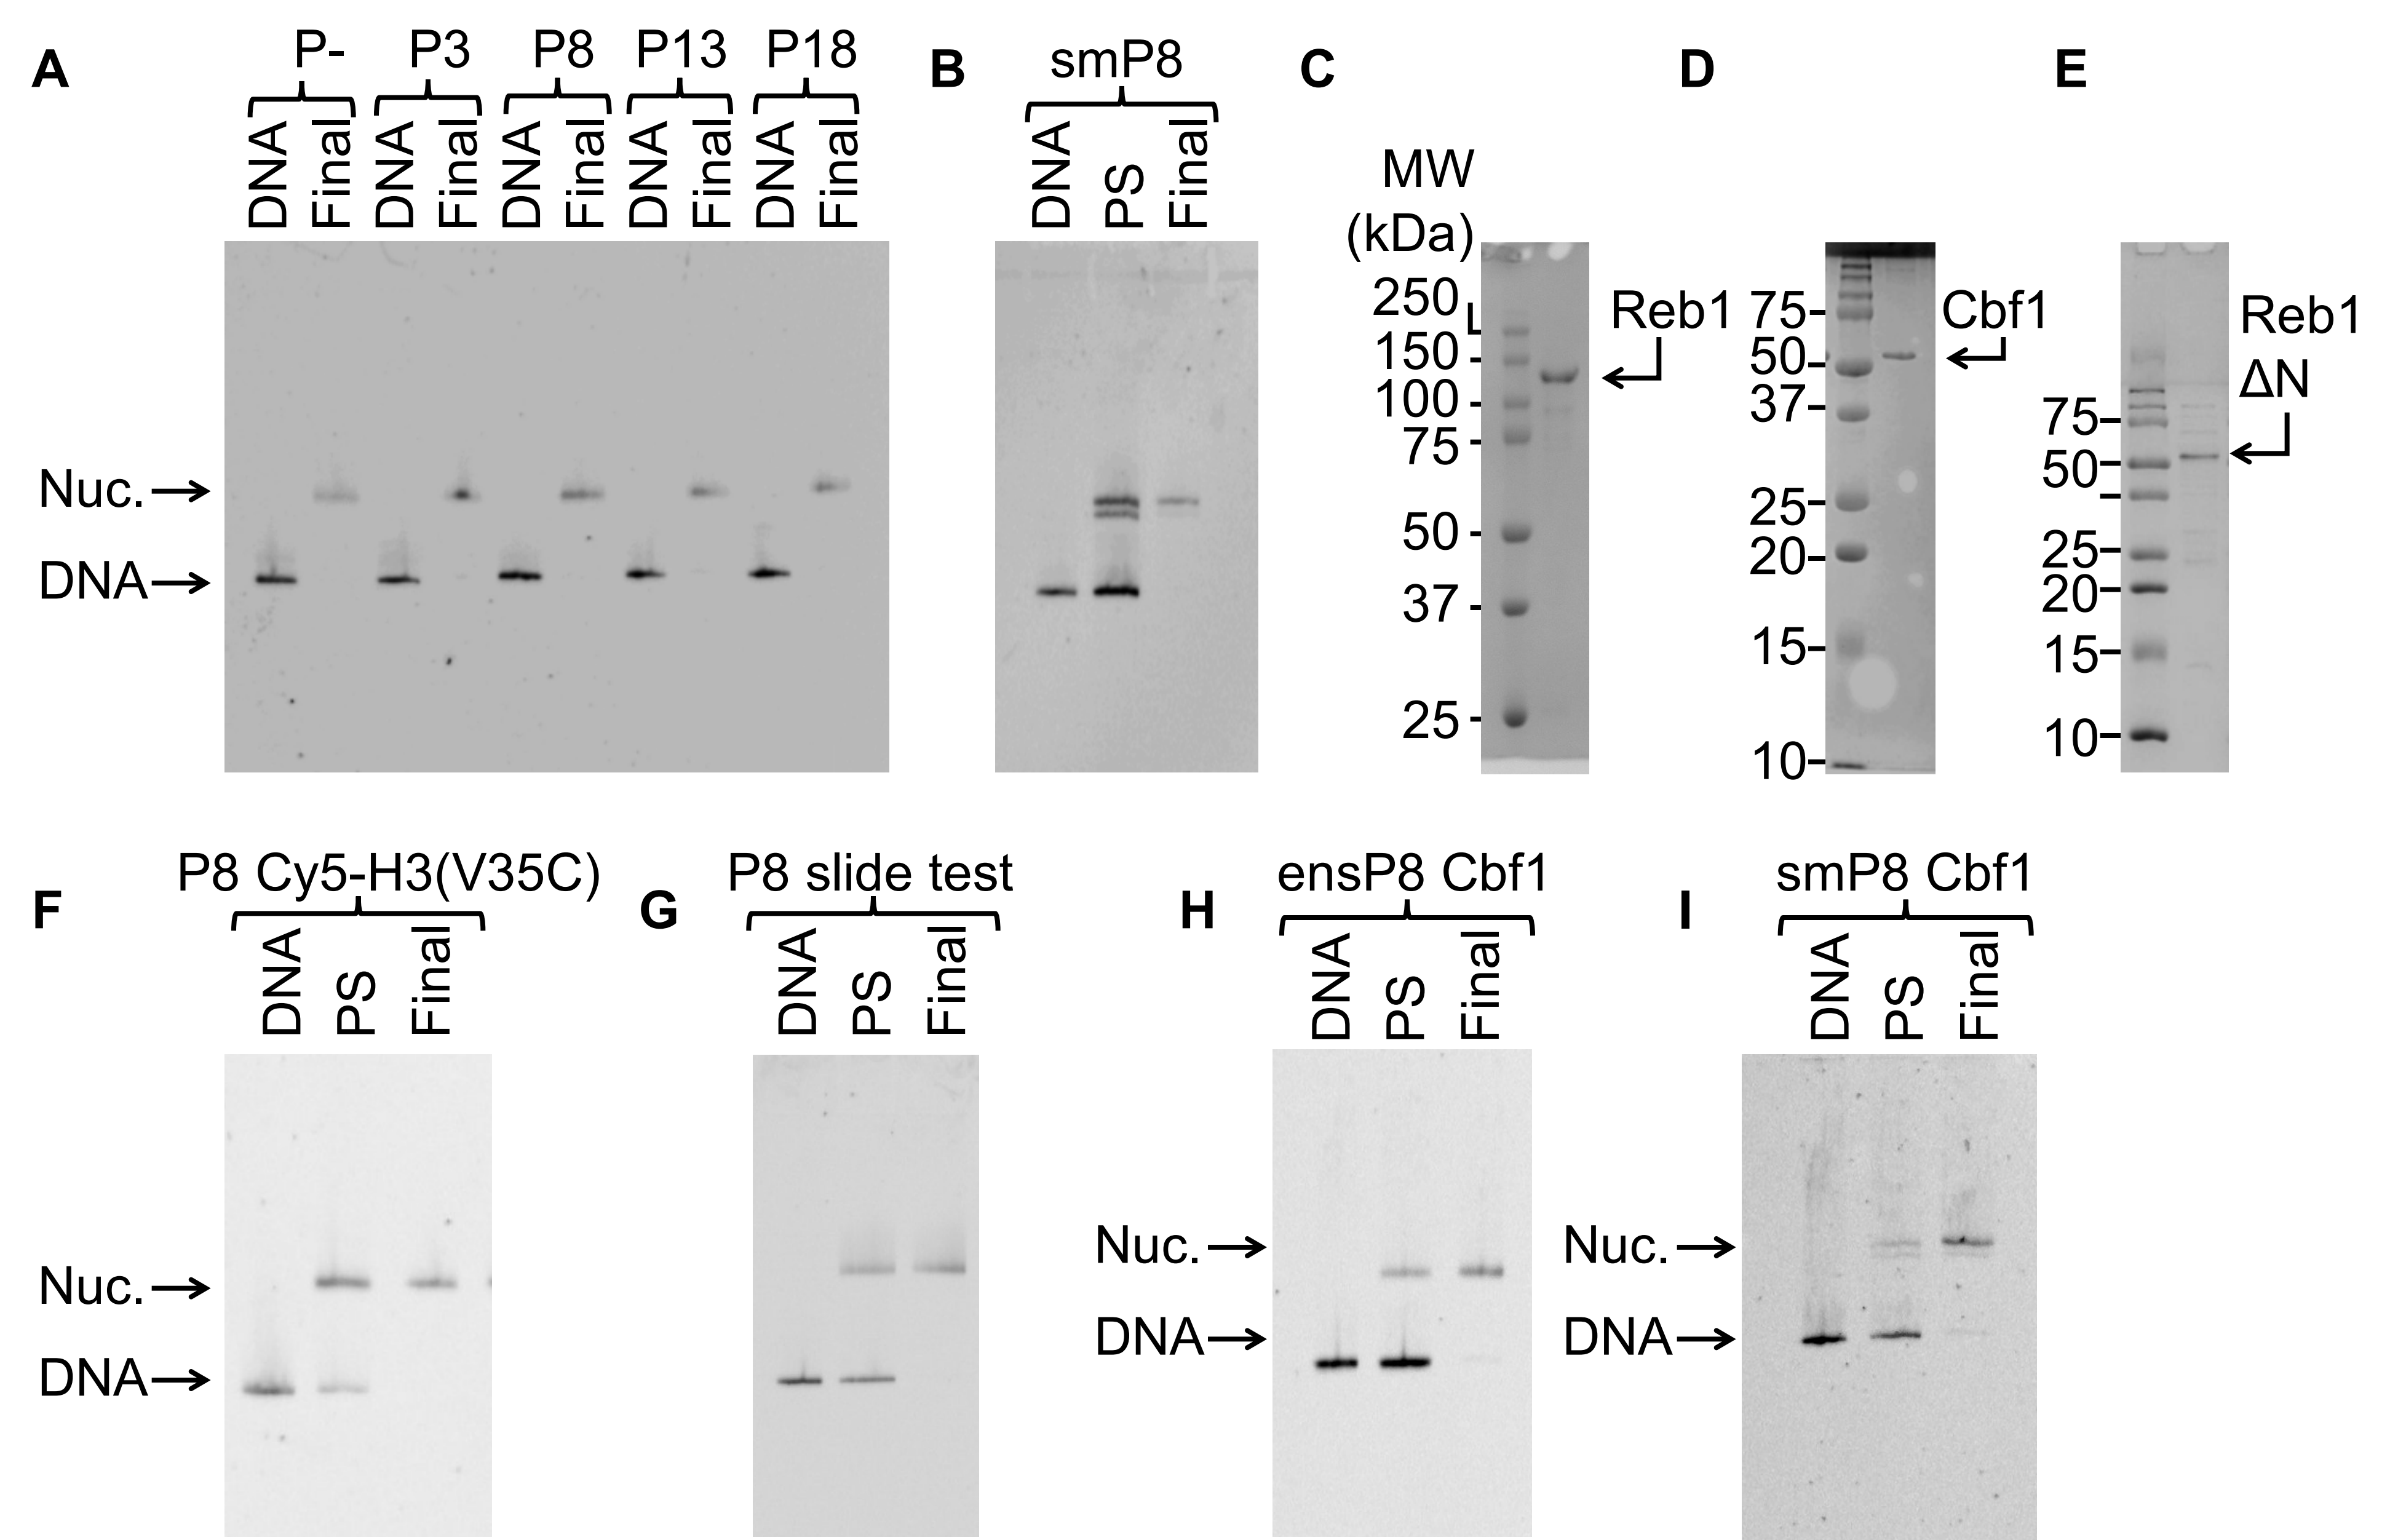

Supplement: supp [file elife-43008-supp-v1.zip]

**A**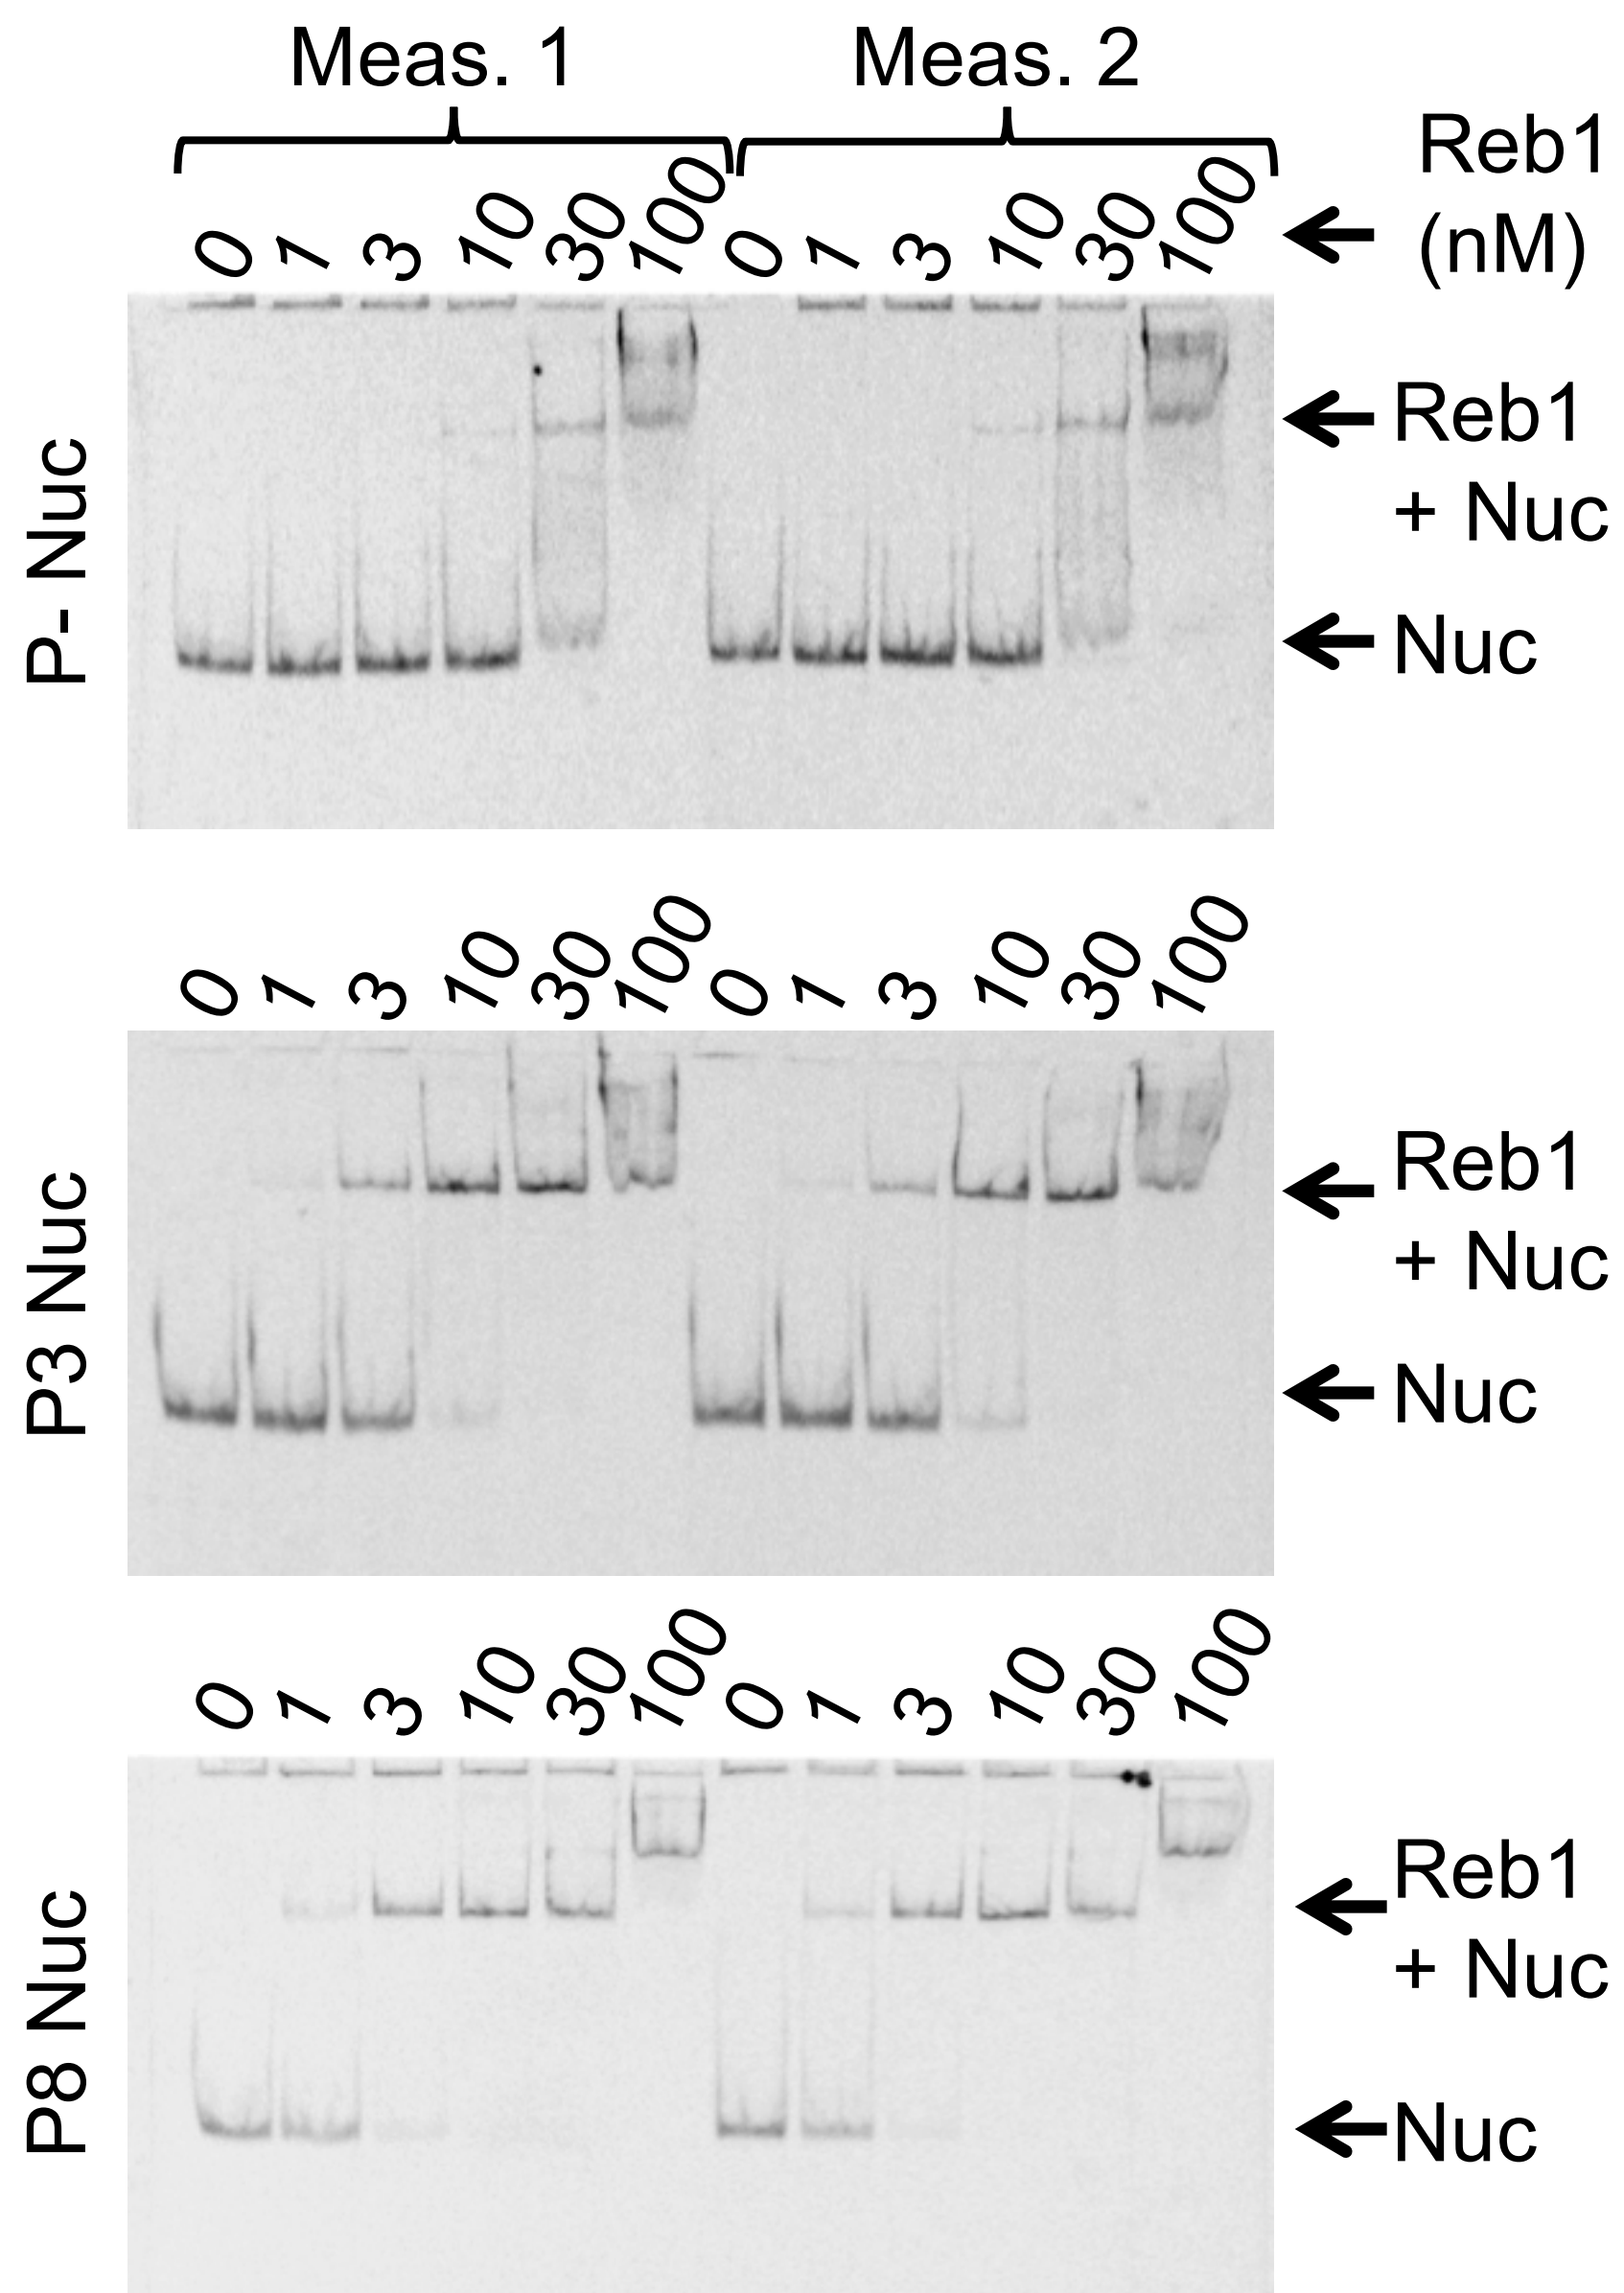**B**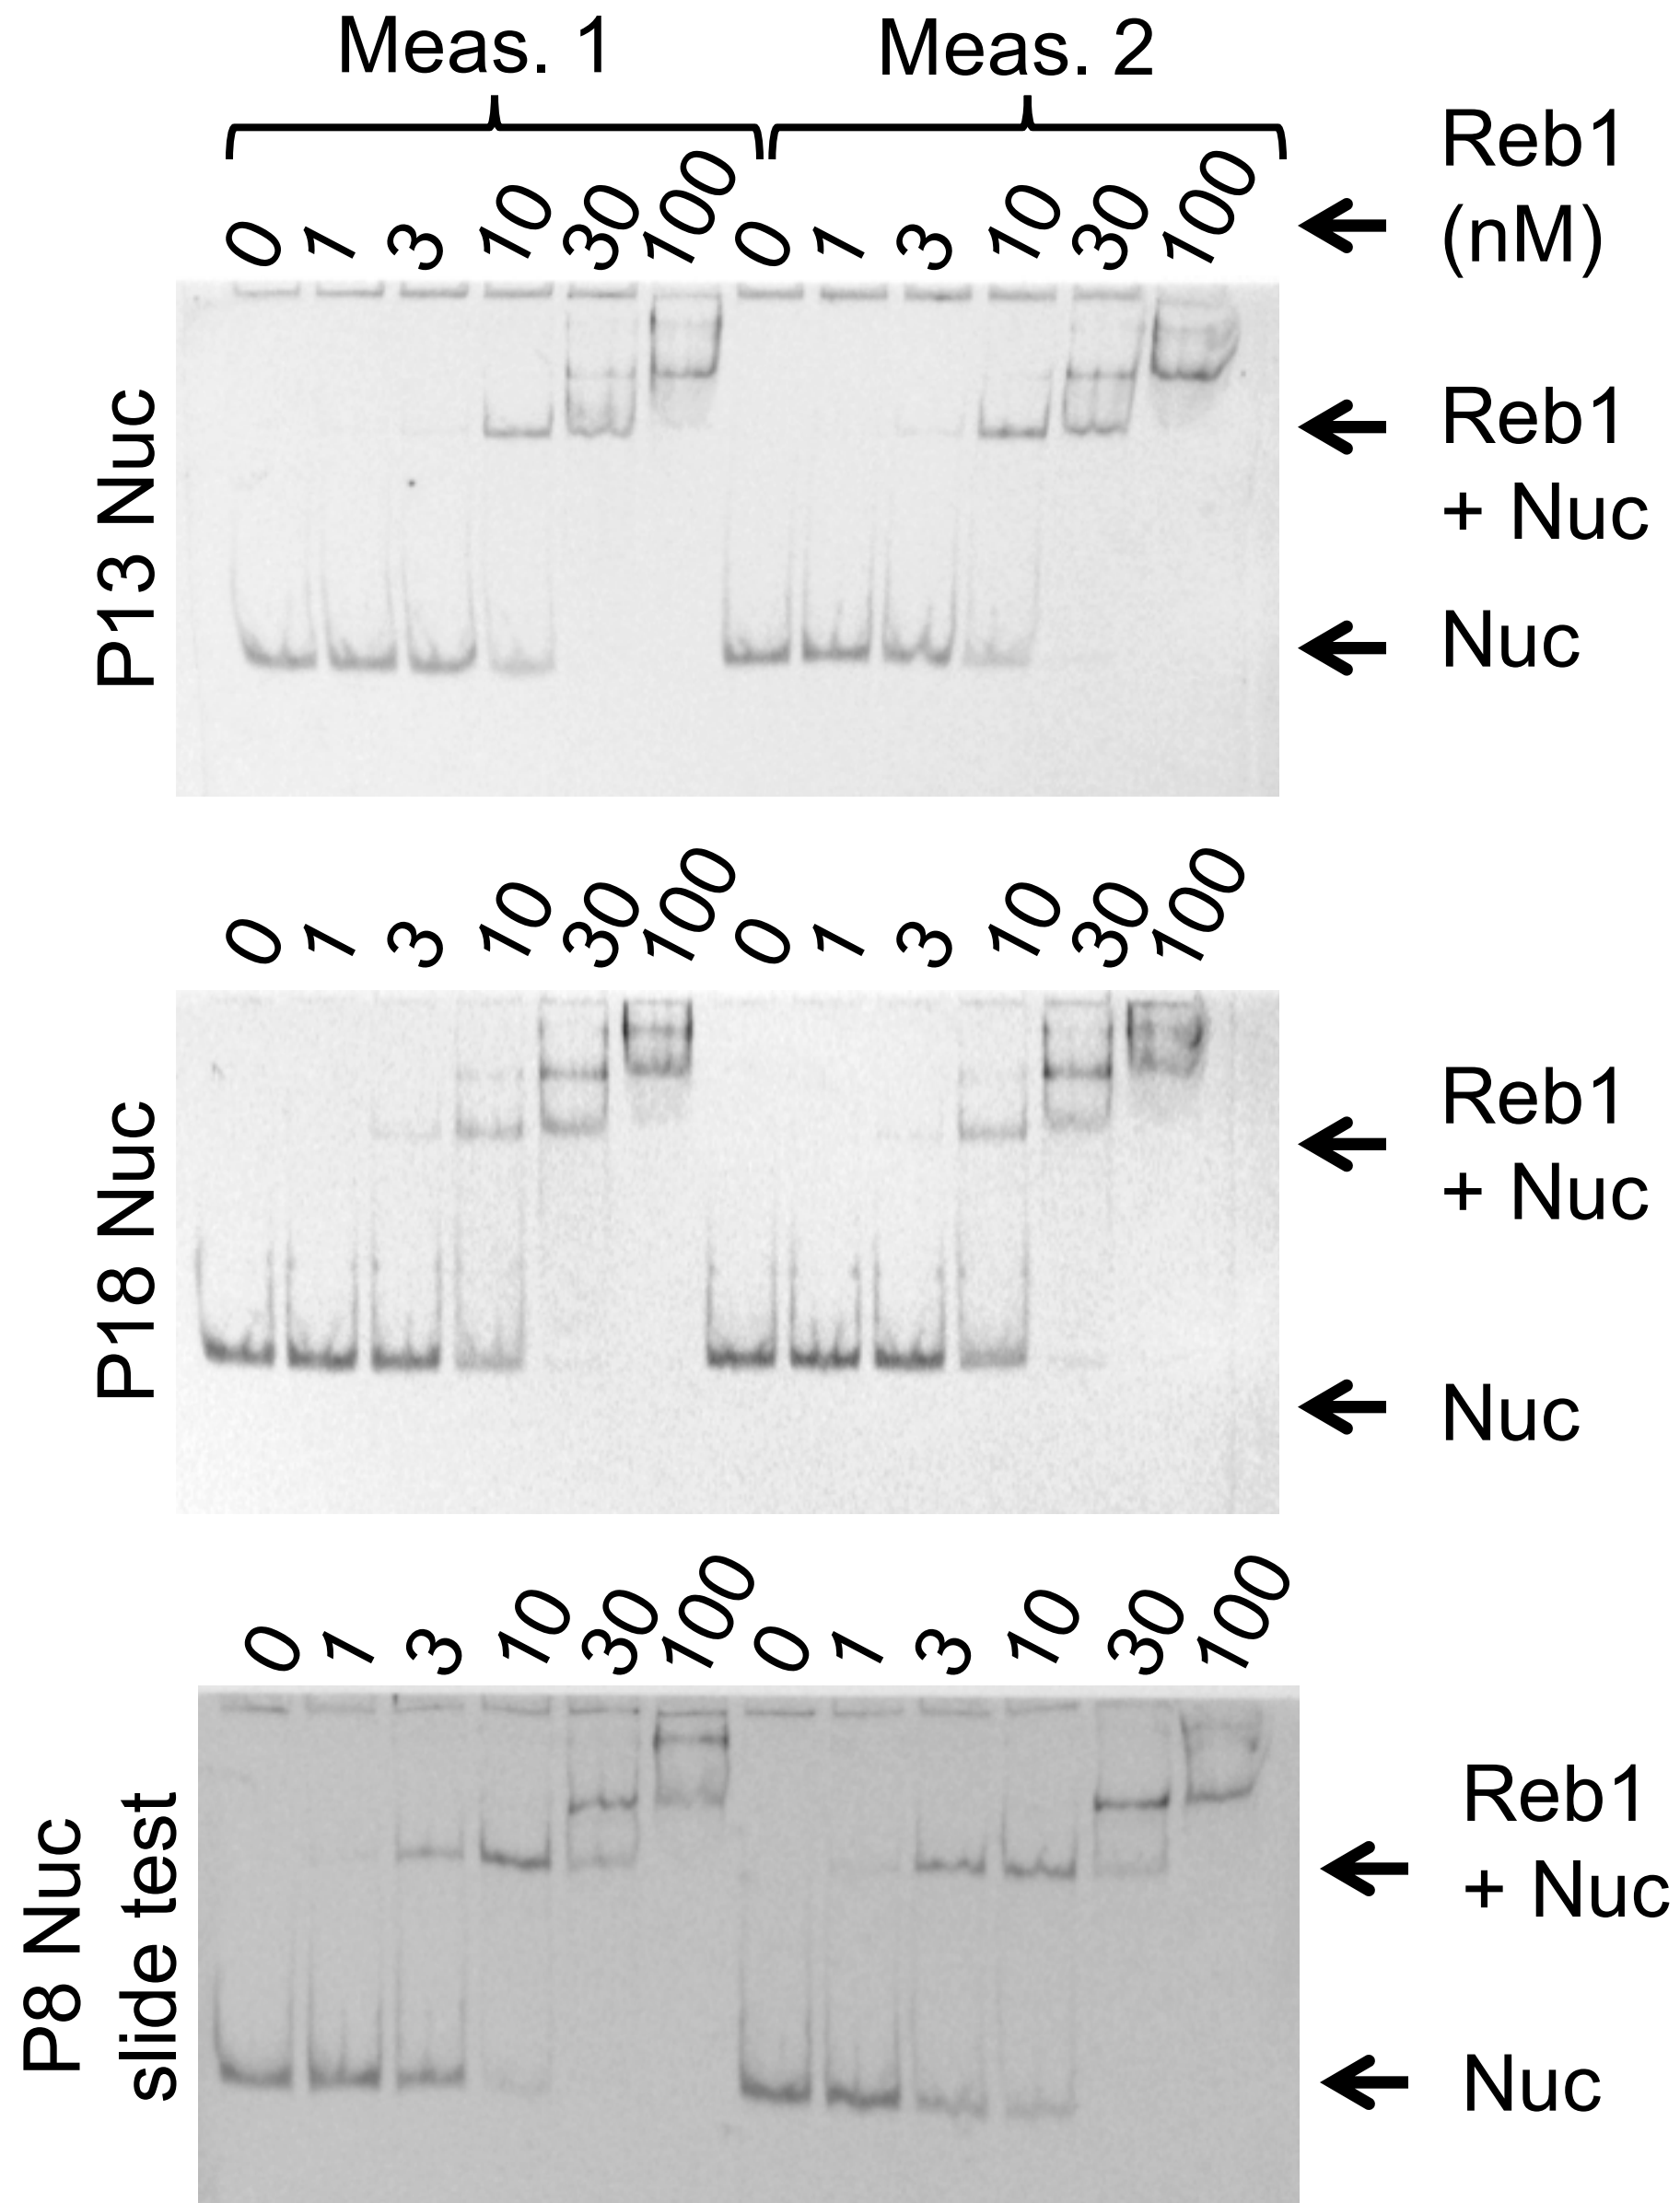**C**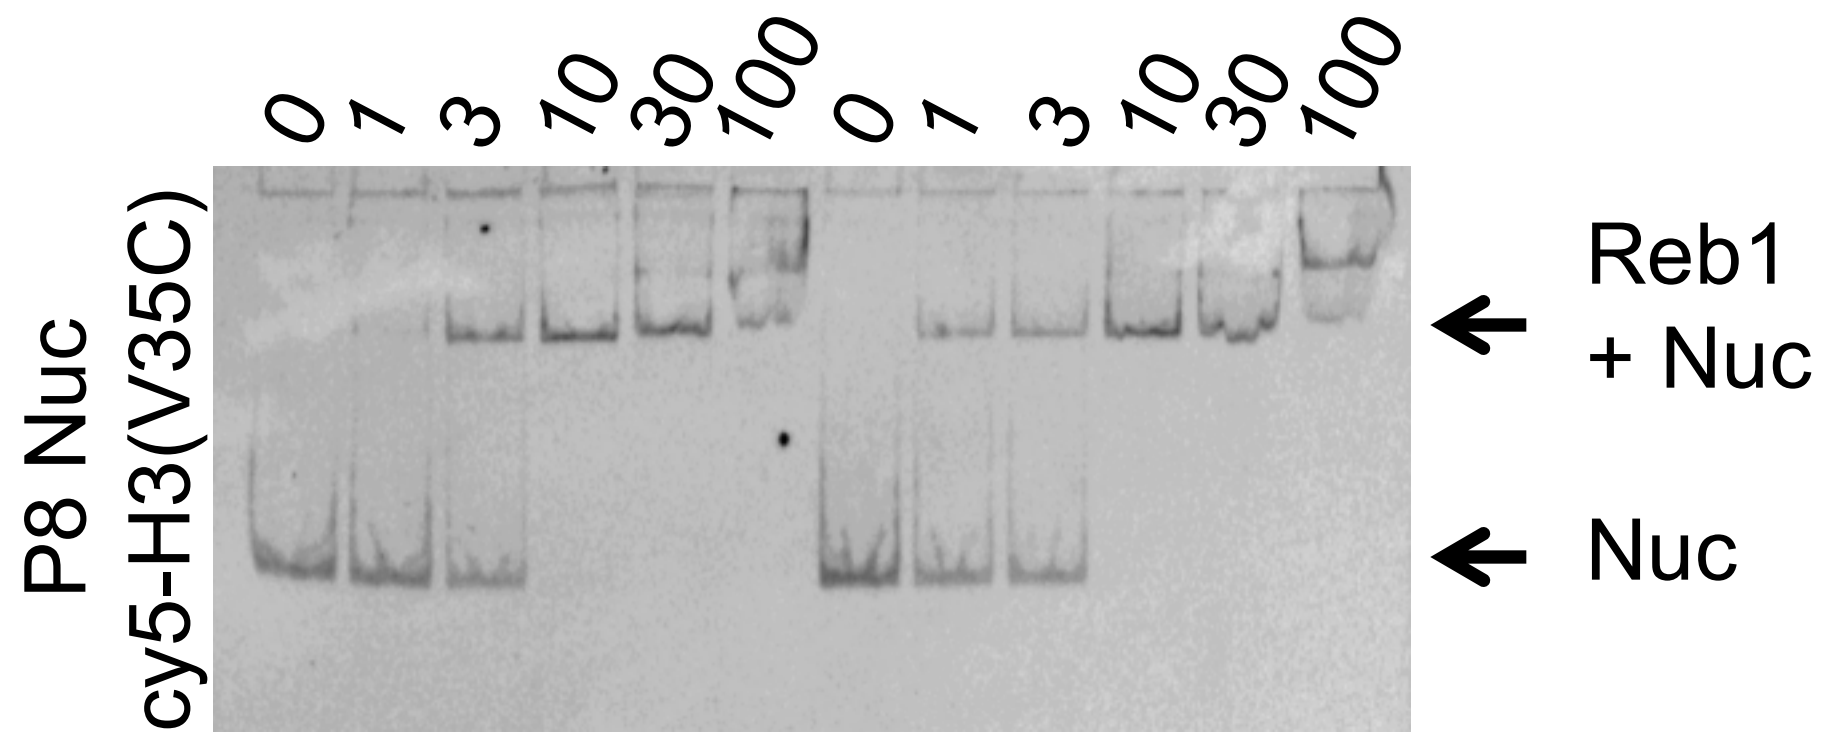

Supplement: supp [file elife-43008-supp-v1.zip]

**A**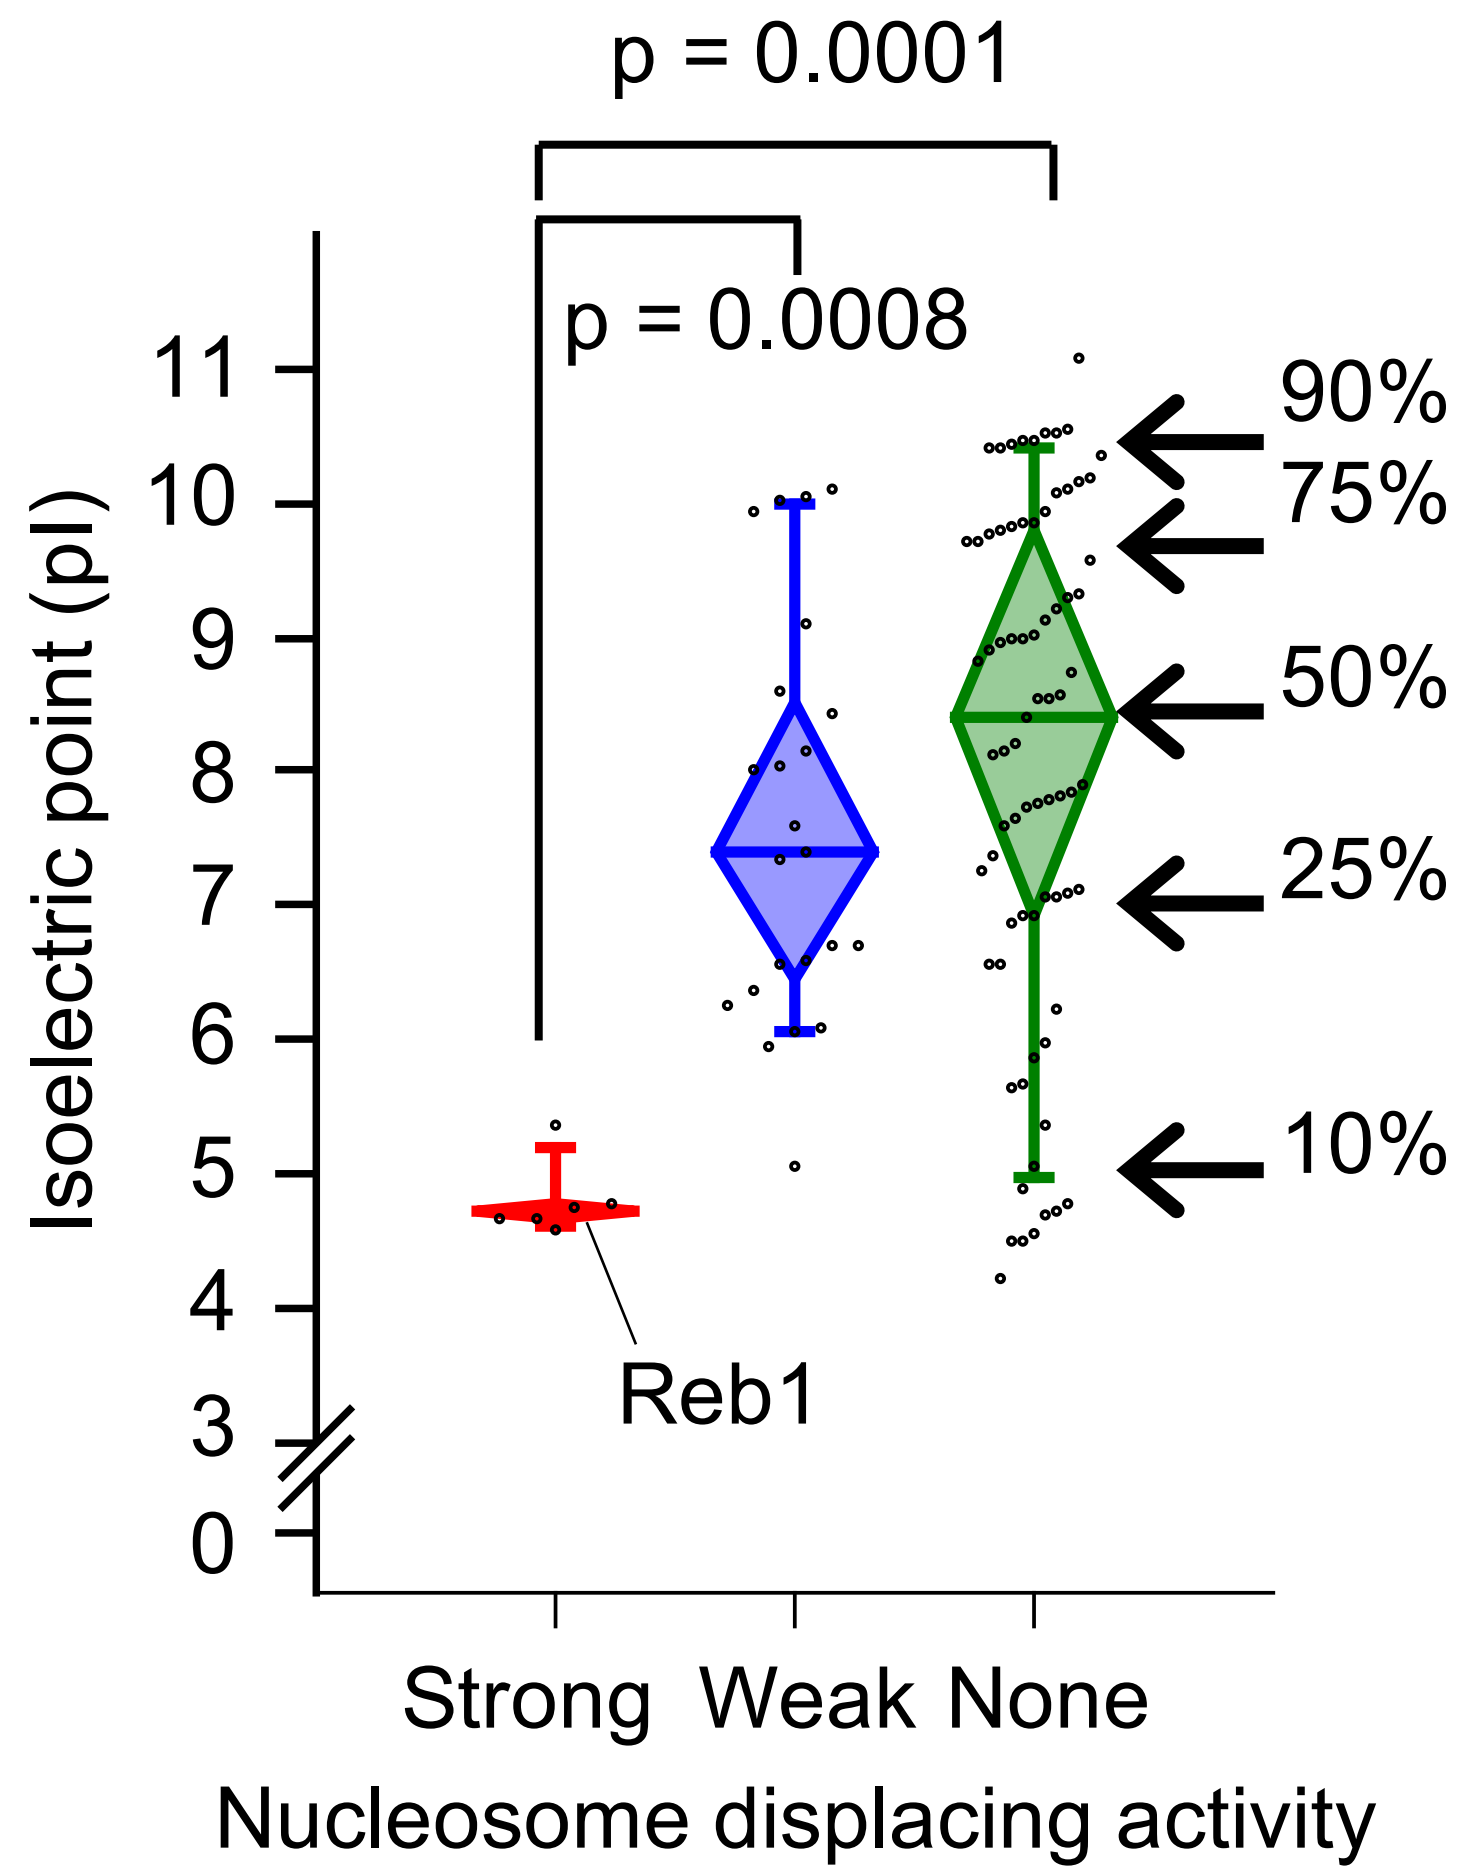**B**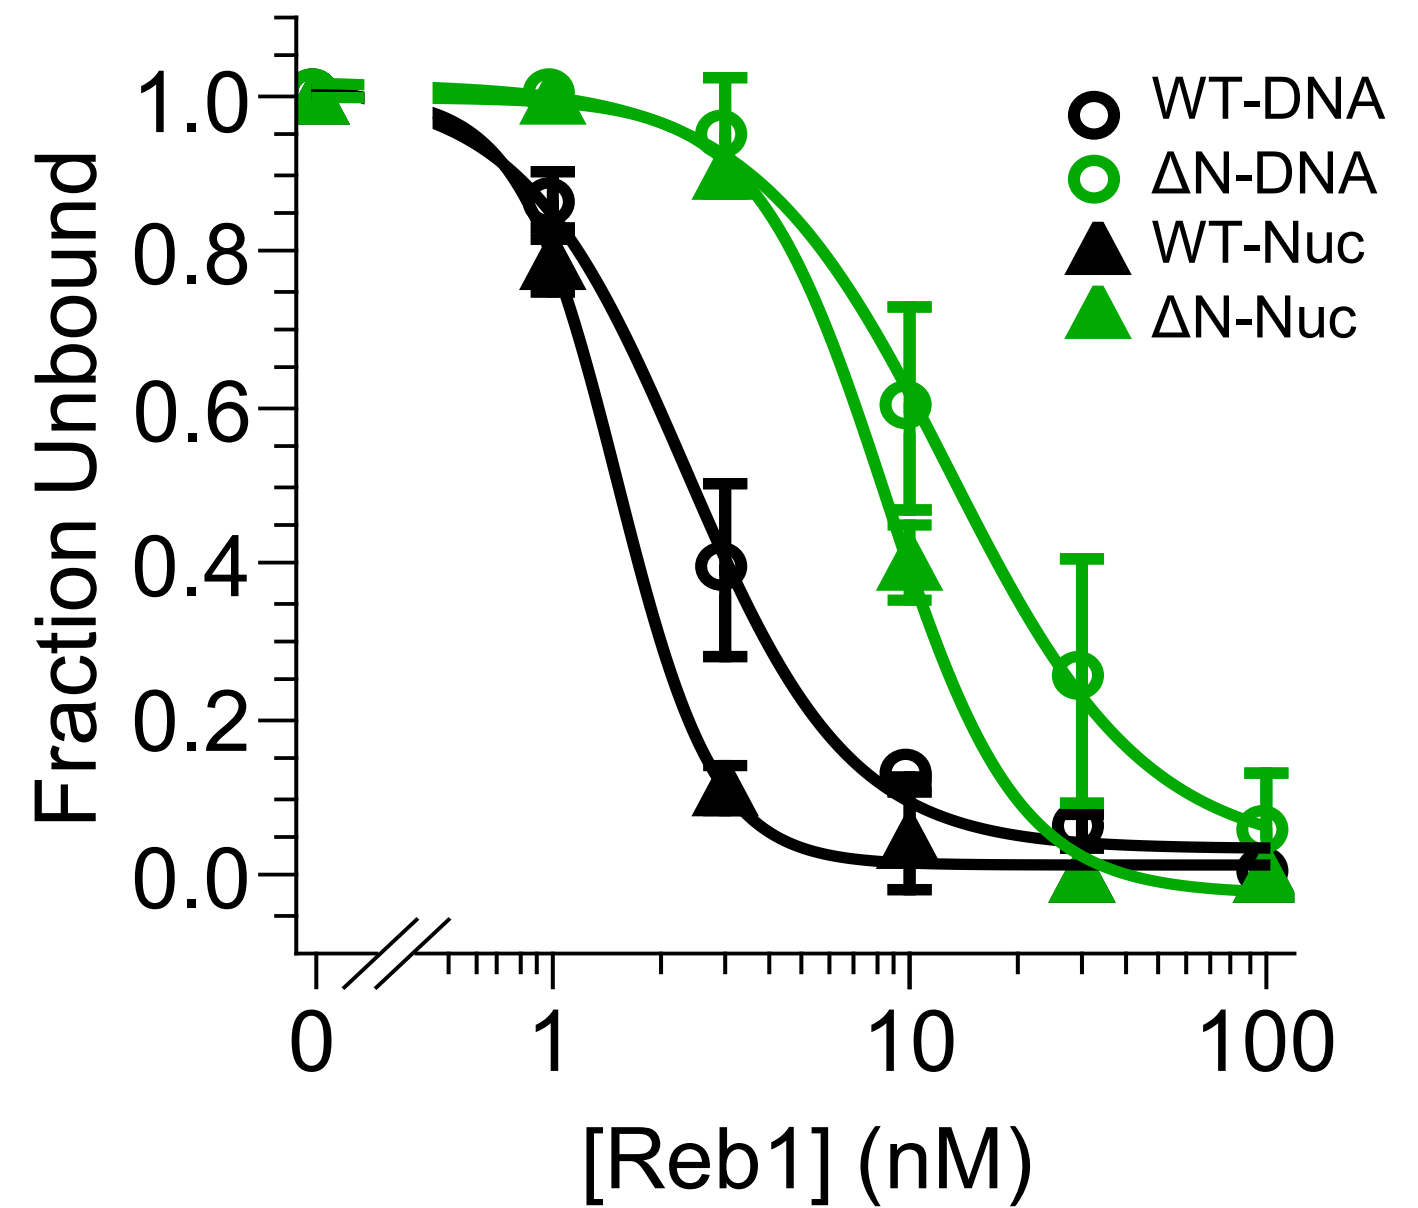

Supplement: supp [file elife-43008-supp-v1.zip]

HHT2

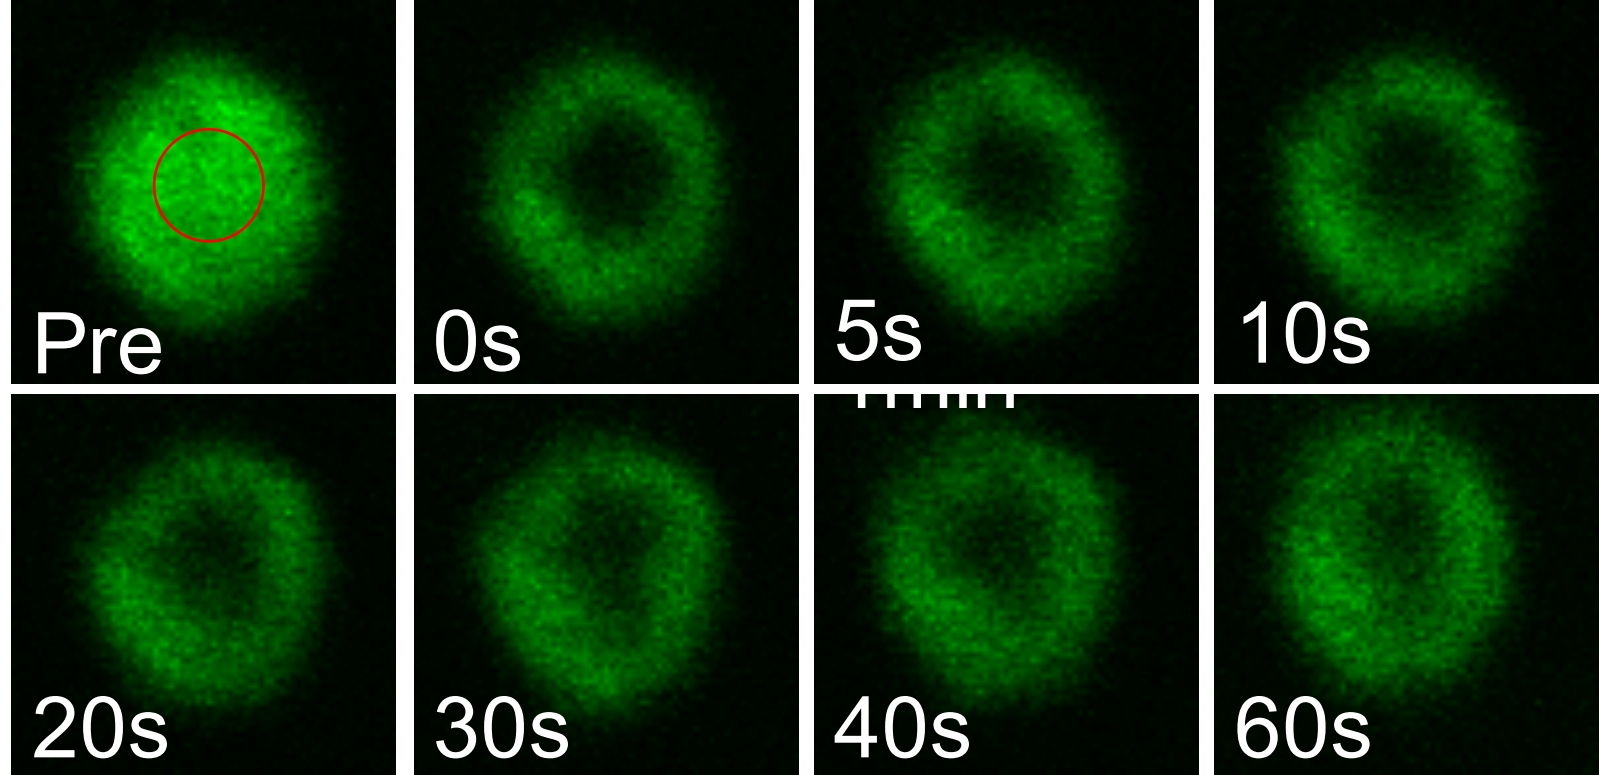

STH1

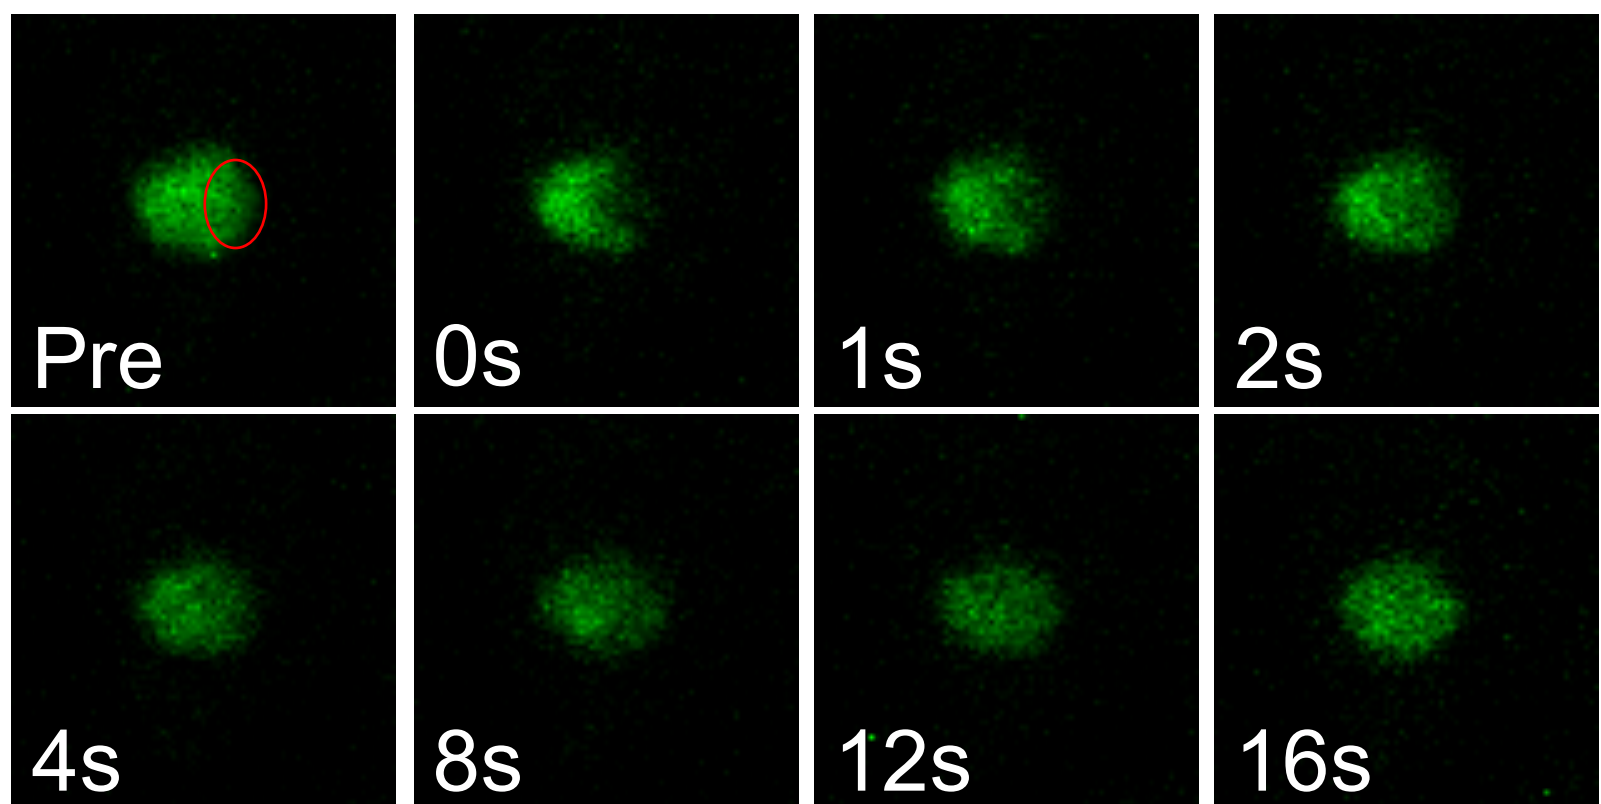

NHP6A

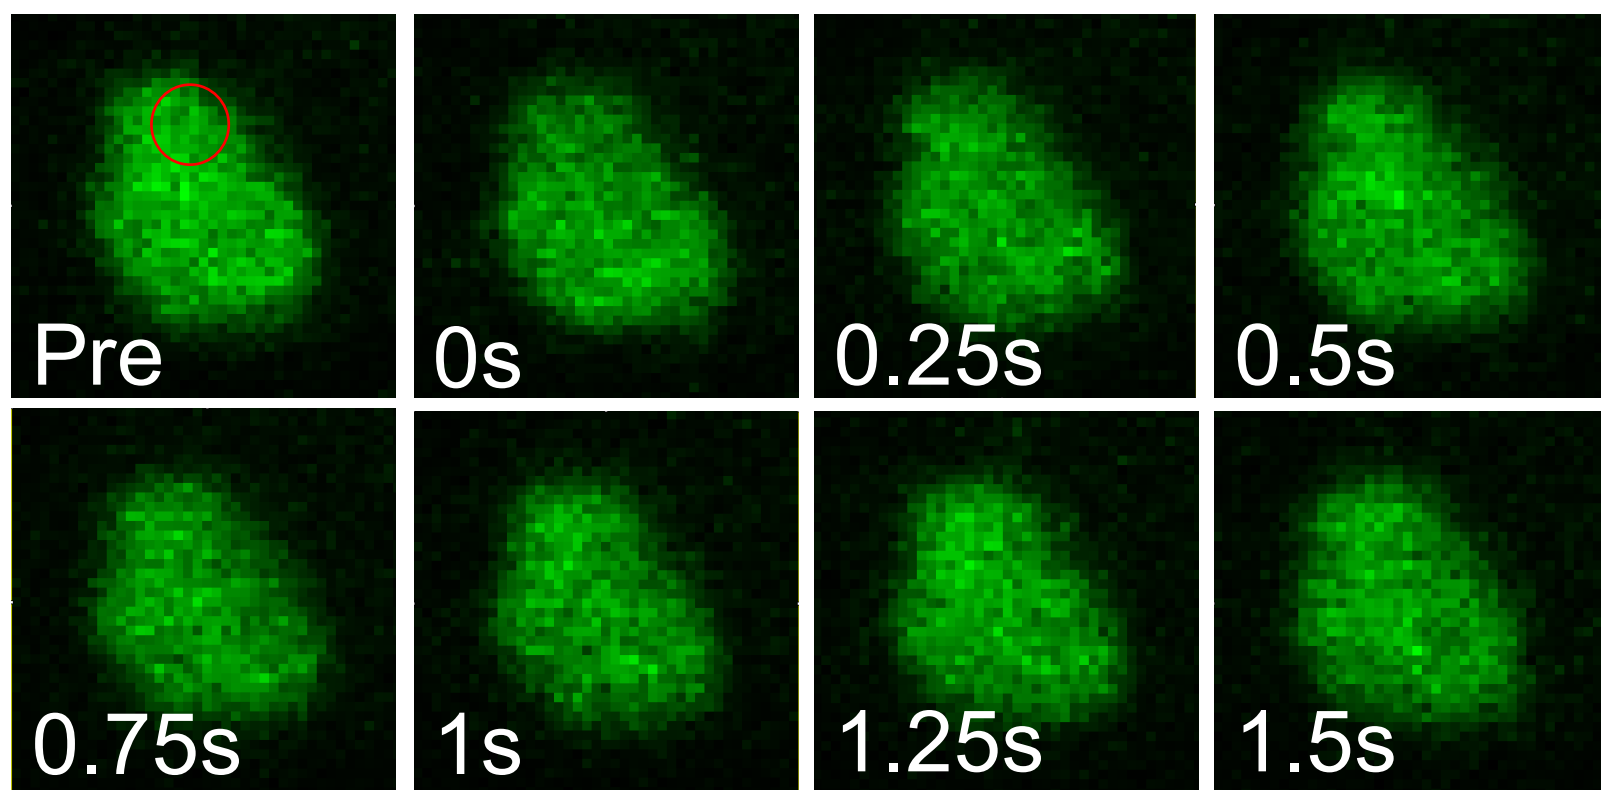

Supplement: supp [file elife-43008-supp-v1.zip]
